# Supplementary material for: Single-cell RNAseq analysis of spinal locomotor circuitry in larval zebrafish
Source: eLife. 2023 Nov 17;12:RP89338. doi: 10.7554/eLife.89338 (PMC10656102; doi:10.7554/eLife.89338)
Supplement: Supplementary file 1. [file elife-89338-supp1.xlsx]

## Sheet: Sheet 1 - Supplemental Table 1
Supplemental Table 1. DEGs in spinal neuron clusters
gene	Gene name
p_val	The Wilcox rank sum p-value
avg_log2FC	The average log base 2 fold change in expression between the cluster and the rest of the neurons
pct.1	The percentage of cells in the cluster expressing the gene
pct.2	The percentage of cells in the rest of the neurons expressing the gene
p_val_adj	The Bonferroni adjusted p value
cluster	The name of the cluster being compared. Unassigned clusters have a numerical stand in
gene	p_val	avg_log2FC	pct.1	pct.2	p_val_adj	cluster
slit3	0	1.39107	0.782	0.173	0	MN
chata	0	1.2527	0.68	0.13	0	MN
slc18a3a	0	1.23449	0.705	0.12	0	MN
mnx1	0	1.09958	0.504	0.036	0	MN
isl2a	0	0.895662	0.524	0.05	0	MN
isl1	4.24512e-294	0.829016	0.504	0.062	9.91449e-290	MN
nr2f1a	5.30462e-291	1.27348	0.726	0.239	1.23889e-286	MN
si:dkey-151g10.6	2.34474e-272	1.06918	0.997	0.989	5.47613e-268	MN
islr2	5.37395e-272	0.937944	0.702	0.182	1.25509e-267	MN
slc5a7a	2.74127e-269	0.985468	0.499	0.072	6.40224e-265	MN
si:ch211-247j9.1	2.57051e-257	0.645926	0.433	0.047	6.00344e-253	MN
alcamb	1.81989e-248	0.946255	0.488	0.079	4.25035e-244	MN
sox4a	3.53963e-243	1.41413	0.786	0.369	8.26682e-239	MN
rplp1	6.87835e-243	1.21118	0.97	0.862	1.60644e-238	MN
alcama	4.92502e-227	0.8875	0.596	0.16	1.15024e-222	MN
rpl36a	6.2391e-223	0.976177	0.968	0.897	1.45714e-218	MN
kif26bb	2.30921e-222	0.571181	0.375	0.039	5.39316e-218	MN
rps12	2.30354e-197	0.963332	0.948	0.805	5.37991e-193	MN
rps15a	4.62711e-194	0.91014	0.956	0.836	1.08066e-189	MN
gpm6aa	7.60066e-192	-0.971071	0.64	0.896	1.77513e-187	MN
rps14	1.56677e-191	0.868862	0.952	0.834	3.6592e-187	MN
rpl37	6.35431e-191	0.877103	0.984	0.905	1.48405e-186	MN
snap25a	6.84373e-185	-1.02406	0.758	0.929	1.59835e-180	MN
rpl12	2.82739e-182	0.966307	0.908	0.746	6.60336e-178	MN
isl2b	1.11624e-181	0.696034	0.327	0.039	2.60698e-177	MN
rps23	8.51092e-179	0.870742	0.948	0.847	1.98772e-174	MN
rpl23	2.65654e-178	0.962041	0.934	0.821	6.20435e-174	MN
rps21	3.11204e-172	0.77349	0.968	0.897	7.26818e-168	MN
agrn	7.05067e-172	0.801557	0.654	0.263	1.64668e-167	MN
rpl38	8.00266e-170	0.792306	0.953	0.873	1.86902e-165	MN
mycn	2.7713e-168	0.838376	0.544	0.176	6.47238e-164	MN
rpl39	9.61211e-168	0.842577	0.976	0.903	2.24491e-163	MN
vamp2	1.90795e-167	-0.939757	0.589	0.844	4.45602e-163	MN
rpl10	4.30016e-167	0.777572	0.939	0.779	1.0043e-162	MN
rpl32	2.01726e-166	0.799035	0.951	0.868	4.7113e-162	MN
rplp2l	5.16748e-166	0.949201	0.886	0.698	1.20687e-161	MN
stx1b	2.06526e-165	-0.968479	0.694	0.904	4.82342e-161	MN
faua	9.72712e-162	0.782752	0.954	0.865	2.27177e-157	MN
nr2f2	4.41119e-160	0.715166	0.556	0.191	1.03023e-155	MN
qkia	5.4014e-160	0.734617	0.649	0.277	1.2615e-155	MN
rps27.1	6.74083e-160	0.79245	0.942	0.847	1.57432e-155	MN
rpl30	2.13179e-157	0.79809	0.922	0.793	4.9788e-153	MN
rps9	6.48242e-157	0.824329	0.894	0.715	1.51397e-152	MN
rpl8	4.0461e-155	0.818897	0.926	0.783	9.44966e-151	MN
BX569787.1	1.25321e-153	0.552529	0.369	0.072	2.92687e-149	MN
sncb	9.70311e-153	-1.2165	0.667	0.848	2.26616e-148	MN
ret	9.40161e-152	0.473686	0.333	0.056	2.19575e-147	MN
aacs	3.23881e-150	0.538731	0.402	0.094	7.56425e-146	MN
atp6v0cb	1.26293e-148	-0.980823	0.543	0.835	2.94957e-144	MN
rpl14	1.63042e-148	0.755375	0.93	0.822	3.80786e-144	MN
jun	1.94799e-147	1.22421	0.874	0.601	4.54954e-143	MN
rpl17	1.37494e-144	0.727624	0.946	0.836	3.21117e-140	MN
nrxn1a	2.06714e-144	-0.879628	0.206	0.59	4.8278e-140	MN
cplx1	2.4826e-143	-0.983626	0.305	0.688	5.79812e-139	MN
nrn1a	1.56379e-142	-1.24075	0.107	0.484	3.65224e-138	MN
rps15	9.50081e-141	0.664478	0.958	0.846	2.21892e-136	MN
slc32a1	1.18453e-138	-1.28103	0.096	0.461	2.76646e-134	MN
rpl10a	1.49746e-138	0.750978	0.898	0.705	3.49731e-134	MN
sinhcafl	2.55733e-138	0.516545	0.439	0.123	5.97265e-134	MN
rps3a	6.97126e-138	0.736766	0.917	0.781	1.62814e-133	MN
CR847968.1	3.77455e-137	0.533037	0.359	0.079	8.81547e-133	MN
rpl35	8.14591e-137	0.717163	0.93	0.838	1.90248e-132	MN
FO082781.1	2.6645e-136	0.678318	0.643	0.283	6.22294e-132	MN
cpe	6.21609e-136	-0.824158	0.321	0.667	1.45177e-131	MN
rps25	7.57406e-136	0.642294	0.962	0.892	1.76892e-131	MN
stxbp1a	2.7463e-135	-0.942688	0.473	0.784	6.41398e-131	MN
rpl7	5.17486e-134	0.676662	0.914	0.731	1.20859e-129	MN
rps20	1.33124e-132	0.715775	0.933	0.814	3.10911e-128	MN
rpl27	3.18687e-132	0.724943	0.897	0.732	7.44295e-128	MN
sncgb	5.1321e-132	-1.03834	0.647	0.868	1.1986e-127	MN
rpl18	5.50578e-132	0.694845	0.919	0.793	1.28587e-127	MN
rpl11	7.97784e-132	0.757437	0.907	0.75	1.86322e-127	MN
rpl26	1.99055e-131	0.739242	0.916	0.78	4.64893e-127	MN
rps28	2.48053e-130	0.74168	0.923	0.797	5.79328e-126	MN
rps19	3.92202e-129	0.668855	0.951	0.85	9.15987e-125	MN
tmsb	2.24122e-128	0.725757	0.647	0.32	5.23437e-124	MN
rps8a	1.75783e-126	0.702216	0.922	0.752	4.10542e-122	MN
rpl36	5.64491e-126	0.681943	0.948	0.853	1.31837e-121	MN
sv2a	6.16907e-126	-0.818289	0.355	0.681	1.44079e-121	MN
rps27a	7.12185e-125	0.618604	0.951	0.859	1.66331e-120	MN
rpl13a	3.23573e-124	0.642952	0.936	0.83	7.55706e-120	MN
rpl28	2.26753e-123	0.646007	0.95	0.846	5.29581e-119	MN
rpl34	1.56712e-121	0.668189	0.897	0.75	3.66002e-117	MN
naca	8.4095e-121	0.65716	0.909	0.767	1.96404e-116	MN
gapdhs	7.05749e-120	-0.939899	0.703	0.876	1.64828e-115	MN
rpl21	1.71169e-119	0.64986	0.911	0.787	3.99765e-115	MN
rpl9	1.33223e-118	0.650044	0.901	0.755	3.11142e-114	MN
rplp0	3.75933e-118	0.623878	0.959	0.86	8.77991e-114	MN
rpl13	7.40199e-118	0.643346	0.919	0.785	1.72873e-113	MN
rpl15	1.34562e-116	0.684384	0.843	0.635	3.1427e-112	MN
pou3f1	1.66342e-115	0.595389	0.458	0.158	3.88493e-111	MN
rplp2	5.80118e-115	0.648761	0.935	0.864	1.35486e-110	MN
mab21l2	1.2305e-114	-1.18132	0.119	0.446	2.87383e-110	MN
rps16	1.66735e-114	0.673852	0.896	0.744	3.89409e-110	MN
rpl19	3.20562e-114	0.636051	0.951	0.857	7.48673e-110	MN
rps4x	3.67076e-112	0.69217	0.875	0.732	8.57307e-108	MN
CR383676.1	1.47055e-111	0.524583	1	1	3.43446e-107	MN
rps5	1.75175e-111	0.645677	0.905	0.76	4.09121e-107	MN
rack1	4.1228e-111	0.636272	0.886	0.714	9.6288e-107	MN
zfhx3	4.66012e-111	-0.968243	0.273	0.589	1.08837e-106	MN
slc17a6b	4.66993e-111	-0.788334	0.044	0.358	1.09066e-106	MN
btf3	8.20601e-111	0.674629	0.864	0.682	1.91651e-106	MN
rps24	1.30561e-109	0.636479	0.931	0.851	3.04926e-105	MN
lhx4	1.2165e-107	0.485342	0.343	0.088	2.84114e-103	MN
robo2	9.45617e-107	-0.811603	0.273	0.583	2.20849e-102	MN
zfhx4	2.17998e-106	-0.921501	0.188	0.516	5.09134e-102	MN
rpl35a	9.28329e-106	0.589363	0.934	0.824	2.16811e-101	MN
rpl27a	1.33895e-105	0.697302	0.826	0.606	3.12713e-101	MN
atp6v1e1b	1.7134e-104	-0.651552	0.34	0.68	4.00165e-100	MN
rps29	3.53333e-104	0.56095	0.983	0.941	8.25209e-100	MN
slc6a17	1.45758e-103	-0.984901	0.145	0.474	3.40419e-99	MN
rpl22	1.2269e-101	0.587579	0.897	0.771	2.86543e-97	MN
rps10	1.45056e-99	0.582115	0.924	0.838	3.38779e-95	MN
rps26l	3.44899e-98	0.603445	0.914	0.79	8.05512e-94	MN
rpl31	4.90469e-96	0.553185	0.957	0.875	1.14549e-91	MN
rps13	5.07845e-96	0.596873	0.921	0.826	1.18607e-91	MN
lhx5	9.05486e-96	-0.520982	0.041	0.327	2.11476e-91	MN
lhx1a	1.44999e-95	-0.721419	0.129	0.441	3.38644e-91	MN
sypa	1.5214e-95	-0.610583	0.272	0.589	3.55322e-91	MN
atp1a3a	8.39381e-93	-0.737139	0.369	0.668	1.96037e-88	MN
aldocb	9.49474e-93	-0.705448	0.487	0.754	2.2175e-88	MN
ywhag2	2.00598e-92	-0.675866	0.644	0.842	4.68498e-88	MN
slc35g2a	4.02422e-91	-0.651681	0.149	0.452	9.39856e-87	MN
rpl18a	1.80382e-90	0.576981	0.891	0.758	4.21282e-86	MN
rpl29	6.2966e-90	0.532463	0.933	0.824	1.47057e-85	MN
calm1b	1.58761e-88	-0.740023	0.424	0.723	3.70787e-84	MN
sh3gl2a	6.57248e-88	-0.549167	0.277	0.596	1.535e-83	MN
eno1a	8.17394e-88	-0.728466	0.276	0.585	1.90902e-83	MN
appb	1.92254e-86	-0.582526	0.378	0.661	4.4901e-82	MN
zgc:114188	2.01873e-86	0.542025	0.914	0.817	4.71475e-82	MN
meis1b	2.98185e-85	0.487462	0.737	0.463	6.96412e-81	MN
dnajc5aa	1.34107e-84	-0.542391	0.409	0.686	3.13206e-80	MN
LOC100537384	3.63424e-84	0.691041	0.682	0.435	8.48776e-80	MN
rps3	7.39348e-84	0.539025	0.826	0.637	1.72675e-79	MN
calm1a	5.29094e-83	-0.580015	0.819	0.931	1.2357e-78	MN
rps7	3.52435e-82	0.553782	0.9	0.803	8.23112e-78	MN
sypb	2.84183e-81	-0.559975	0.257	0.545	6.6371e-77	MN
atp6ap2	3.06942e-80	-0.500852	0.227	0.521	7.16862e-76	MN
ppp3r1a	3.79256e-79	-0.622187	0.38	0.646	8.85752e-75	MN
syt1a	4.17943e-79	-0.680325	0.24	0.521	9.76107e-75	MN
gad2	5.66014e-79	-1.09296	0.065	0.315	1.32193e-74	MN
atp6v1g1	1.39102e-78	-0.586465	0.374	0.655	3.24873e-74	MN
nfil3-5	1.26275e-77	0.50907	0.625	0.356	2.94915e-73	MN
rps11	5.20409e-77	0.509306	0.907	0.803	1.21541e-72	MN
gpm6ab	2.1672e-76	-0.676784	0.661	0.801	5.06149e-72	MN
marcksl1a	3.01099e-76	0.509443	0.795	0.54	7.03217e-72	MN
atp1b2a	3.49407e-76	-0.61866	0.501	0.741	8.1604e-72	MN
hmga1a	4.16055e-76	0.551697	0.734	0.522	9.71696e-72	MN
IGLON5	9.03248e-76	-0.507803	0.25	0.528	2.10954e-71	MN
atp1b1b	1.24894e-75	-1.26433	0.151	0.415	2.9169e-71	MN
h3f3d	2.30581e-75	0.439422	0.981	0.938	5.38523e-71	MN
nrxn3a	3.1359e-75	-0.613304	0.131	0.393	7.3239e-71	MN
clstn1	4.05092e-75	-0.559316	0.451	0.688	9.46091e-71	MN
rps6	1.17301e-74	0.527077	0.75	0.562	2.73957e-70	MN
rpl7a	1.56847e-74	0.493464	0.885	0.743	3.66315e-70	MN
lmo4b	2.09429e-74	0.513294	0.317	0.11	4.89121e-70	MN
slc6a5	2.02698e-73	-1.61737	0.129	0.373	4.734e-69	MN
rpsa	4.8216e-73	0.486873	0.891	0.747	1.12609e-68	MN
npas4a	7.8649e-73	-0.694664	0.165	0.431	1.83685e-68	MN
bsg	1.48172e-72	-0.508316	0.476	0.726	3.46055e-68	MN
sulf2b	3.42036e-71	-0.544449	0.076	0.319	7.98825e-67	MN
sox11a	1.88444e-70	0.667714	0.746	0.526	4.40112e-66	MN
nme2b.1	1.88469e-70	0.529485	0.834	0.695	4.4017e-66	MN
cpeb2	3.54271e-70	-0.557385	0.357	0.625	8.27401e-66	MN
tob1a	4.24138e-70	-0.733652	0.564	0.751	9.90574e-66	MN
vsnl1b	4.76709e-70	-0.623646	0.384	0.644	1.11335e-65	MN
serbp1a	2.09889e-69	0.490425	0.808	0.638	4.90196e-65	MN
spock2	2.93924e-69	-0.504444	0.227	0.492	6.86459e-65	MN
rnasekb	6.64741e-69	-0.474052	0.448	0.702	1.5525e-64	MN
scg2b	1.02665e-67	-1.01465	0.295	0.553	2.39774e-63	MN
pcdh7b	1.08376e-67	-0.492052	0.205	0.468	2.53111e-63	MN
pik3r3b	2.00487e-67	0.618379	0.766	0.584	4.68236e-63	MN
rps27.2	3.71932e-67	0.472751	0.784	0.61	8.68648e-63	MN
camk2n1a	1.63896e-66	-0.602246	0.283	0.538	3.8278e-62	MN
si:ch211-214j24.9	6.5175e-66	-0.473061	0.227	0.485	1.52216e-61	MN
nanos1	9.5965e-66	0.552819	0.718	0.502	2.24126e-61	MN
eef1g	1.07056e-65	0.477957	0.85	0.684	2.5003e-61	MN
si:ch211-222l21.1	1.19128e-65	0.580101	0.903	0.789	2.78224e-61	MN
stmn2a	1.39832e-65	-0.686487	0.433	0.667	3.26577e-61	MN
tppp2	8.28529e-65	0.497828	0.432	0.206	1.93503e-60	MN
atpv0e2	5.27609e-64	-0.438127	0.25	0.507	1.23223e-59	MN
slc2a3a	2.52773e-63	-0.618588	0.189	0.434	5.90351e-59	MN
ebf1a	4.82107e-63	0.501981	0.364	0.156	1.12596e-58	MN
rps18	7.82903e-63	0.499026	0.749	0.572	1.82847e-58	MN
rps17	9.88323e-63	0.503739	0.605	0.386	2.30823e-58	MN
map1aa	1.43464e-62	-0.572691	0.374	0.597	3.3506e-58	MN
ckbb	1.66626e-62	-0.556864	0.653	0.827	3.89155e-58	MN
uba52	2.28361e-62	0.461375	0.869	0.747	5.33337e-58	MN
sik1	5.05085e-62	-0.476001	0.129	0.366	1.17963e-57	MN
calm3a	5.74769e-62	-0.411818	0.288	0.558	1.34237e-57	MN
rpl23a	8.32969e-62	0.482945	0.809	0.658	1.9454e-57	MN
pygmb	5.93187e-61	-0.418203	0.205	0.461	1.38539e-56	MN
cycsb	5.30214e-60	-0.631434	0.44	0.657	1.23832e-55	MN
rps2	7.06877e-60	0.462934	0.882	0.777	1.65091e-55	MN
ephb3	2.77988e-59	0.554049	0.47	0.263	6.4924e-55	MN
mir132-2	7.83363e-59	-0.486613	0.109	0.333	1.82954e-54	MN
cspg5a	8.35099e-59	-0.467048	0.236	0.474	1.95037e-54	MN
nptna	1.60672e-58	-0.402417	0.249	0.524	3.7525e-54	MN
cntn2	1.40567e-57	0.496703	0.352	0.162	3.28295e-53	MN
atp2b3a	3.7186e-57	-0.467699	0.34	0.585	8.6848e-53	MN
foxp1b	8.28197e-57	0.676551	0.406	0.206	1.93425e-52	MN
clta	2.0054e-56	-0.448042	0.261	0.494	4.68362e-52	MN
hoxb8a	2.1514e-56	-0.611606	0.196	0.419	5.02459e-52	MN
hnrnpa0l	2.65452e-56	0.421841	0.888	0.772	6.19963e-52	MN
si:dkeyp-77h1.4	3.0634e-56	-0.449211	0.113	0.331	7.15456e-52	MN
aplp2	3.0981e-56	-0.391898	0.199	0.437	7.23562e-52	MN
onecut1	5.02964e-56	0.436893	0.377	0.171	1.17467e-51	MN
pacsin1a	1.85994e-55	-0.467031	0.407	0.631	4.3439e-51	MN
pcdh17	4.55434e-55	-0.490062	0.122	0.343	1.06367e-50	MN
tpt1	7.67743e-55	0.45202	0.731	0.561	1.79306e-50	MN
myt1b	1.512e-54	0.477443	0.833	0.697	3.53128e-50	MN
appa	2.89371e-54	-0.393402	0.457	0.682	6.75827e-50	MN
serinc1	2.12442e-53	-0.427649	0.445	0.662	4.96159e-49	MN
atp6v0a1b	2.65807e-53	-0.393597	0.274	0.514	6.20792e-49	MN
rpl5b	2.74249e-53	0.398286	0.592	0.38	6.40509e-49	MN
rpl24	5.86305e-53	0.425115	0.88	0.793	1.36932e-48	MN
atp2b4	1.78795e-52	-0.529881	0.348	0.578	4.17575e-48	MN
eno2	4.32957e-52	-0.404693	0.45	0.674	1.01117e-47	MN
fosb	6.12668e-52	-0.83076	0.183	0.395	1.43089e-47	MN
rps26	1.48175e-51	0.428481	0.807	0.678	3.46063e-47	MN
spock1	2.12287e-51	-0.529438	0.23	0.445	4.95797e-47	MN
atp2b3b	6.33213e-51	-0.386042	0.225	0.46	1.47887e-46	MN
pclob	1.44485e-50	-0.467844	0.284	0.506	3.37444e-46	MN
ddit3	4.90569e-50	0.541628	0.636	0.442	1.14572e-45	MN
pou3f3b	8.73473e-50	0.493277	0.581	0.38	2.04e-45	MN
msi2b	9.61933e-50	-0.62237	0.301	0.506	2.2466e-45	MN
bsnb	1.18026e-49	-0.40956	0.192	0.41	2.7565e-45	MN
edil3a	2.22808e-49	-0.447466	0.224	0.457	5.20367e-45	MN
ckmt1	2.27464e-49	-0.425929	0.203	0.424	5.31241e-45	MN
fabp3	3.2238e-49	0.438872	0.796	0.64	7.52918e-45	MN
gnb1b	4.64951e-49	-0.415688	0.626	0.774	1.08589e-44	MN
si:ch73-386h18.1	8.77569e-49	-0.525363	0.378	0.581	2.04956e-44	MN
pcsk1	1.27032e-47	-0.43602	0.173	0.381	2.96682e-43	MN
cplx2l	1.07761e-46	-0.521016	0.394	0.604	2.51676e-42	MN
gnao1a	6.97195e-46	-0.416614	0.442	0.627	1.6283e-41	MN
atp1b3b	4.58068e-45	-0.406959	0.335	0.554	1.06982e-40	MN
map1ab	1.19206e-44	-0.496096	0.213	0.415	2.78405e-40	MN
pnrc2	5.73082e-43	0.427595	0.88	0.799	1.33843e-38	MN
scg3	1.7172e-42	-0.616684	0.151	0.336	4.01053e-38	MN
si:ch211-195b13.1	9.08321e-42	-0.42435	0.294	0.487	2.12138e-37	MN
tmsb2	2.5827e-41	-0.387222	0.141	0.326	6.03189e-37	MN
tmsb4x	4.14565e-41	-0.449009	0.957	0.965	9.68216e-37	MN
atf3	1.25509e-40	0.576105	0.669	0.49	2.93126e-36	MN
strbp	2.9588e-40	-0.421598	0.189	0.373	6.91028e-36	MN
mdkb	1.3252e-38	-0.424308	0.426	0.607	3.095e-34	MN
atp1a1a.1	3.98223e-38	-0.428214	0.456	0.631	9.3005e-34	MN
aldoaa	4.88803e-35	-0.386044	0.419	0.591	1.1416e-30	MN
cacna2d2a	1.02808e-34	-0.405259	0.199	0.37	2.40107e-30	MN
hist2h2l	1.20471e-34	-0.423884	0.411	0.579	2.81361e-30	MN
slc1a2b	1.50921e-34	-0.387175	0.199	0.376	3.52476e-30	MN
snap25b	2.62956e-34	-0.505004	0.47	0.613	6.14134e-30	MN
kcnc3a	4.29269e-34	-0.449724	0.384	0.567	1.00256e-29	MN
si:ch211-153j24.3	2.30081e-33	-0.417655	0.227	0.399	5.37354e-29	MN
stmn4l	8.16031e-33	0.57766	0.699	0.561	1.90584e-28	MN
syt2a	9.08104e-32	-0.535316	0.612	0.716	2.12088e-27	MN
h2afx1	1.14582e-30	-0.382399	0.8	0.864	2.67605e-26	MN
pim1	3.73232e-26	-0.392194	0.367	0.512	8.71683e-22	MN
fosaa	5.53341e-25	-0.39437	0.366	0.508	1.29233e-20	MN
rbfox3a	7.43376e-23	-0.437489	0.413	0.542	1.73615e-18	MN
tuba1c	2.64192e-22	-0.415702	0.785	0.842	6.1702e-18	MN
ppdpfb	1.11931e-21	-0.428118	0.669	0.78	2.61416e-17	MN
olfm1b	6.00723e-21	-0.401028	0.448	0.553	1.40299e-16	MN
fosab	7.01471e-20	-0.459735	0.671	0.757	1.63829e-15	MN
zgc:65851	1.73237e-17	-0.530329	0.185	0.3	4.04596e-13	MN
ache	2.20715e-14	0.470228	0.404	0.316	5.1548e-10	MN
crema	1.43728e-12	-0.582587	0.329	0.41	3.35678e-08	MN
dnajb1b	1.43051e-10	0.61672	0.556	0.493	3.34095e-06	MN
nppc	0	5.53159	0.997	0.146	0	KA
pkd2l1	0	4.17582	0.986	0.037	0	KA
pkd1l2a	0	4.05071	0.966	0.028	0	KA
scg2a	0	3.67945	0.975	0.198	0	KA
urp2	0	3.45356	0.572	0.023	0	KA
si:ch211-153f2.7	0	2.55357	0.912	0.153	0	KA
tac3a	0	2.1726	0.462	0.008	0	KA
slc6a1b	0	2.11504	0.912	0.146	0	KA
tal2	0	2.03133	0.841	0.076	0	KA
esm1	0	1.9567	0.714	0.018	0	KA
eps8l2	0	1.79353	0.793	0.006	0	KA
gadd45ab	0	1.78966	0.793	0.081	0	KA
shisal1a	0	1.64463	0.81	0.03	0	KA
sox1b	0	1.50832	0.705	0.011	0	KA
rhpn2	0	1.49239	0.666	0.012	0	KA
c2cd4a	0	1.43408	0.68	0.013	0	KA
nkx6.1	0	1.34184	0.722	0.046	0	KA
scinlb	0	1.33852	0.711	0.009	0	KA
rfx4	0	1.2639	0.722	0.063	0	KA
foxa	0	1.25967	0.414	0.004	0	KA
tal1	0	1.22343	0.666	0.053	0	KA
bicdl2l	0	1.22158	0.448	0.003	0	KA
CU856539.2	0	1.07918	0.623	0.004	0	KA
myo3b	0	1.02929	0.615	0.004	0	KA
baiap2a	0	0.989448	0.584	0.02	0	KA
espn	0	0.923277	0.575	0.002	0	KA
dcn	0	0.870173	0.45	0.009	0	KA
rasgrf2b	0	0.851031	0.544	0.02	0	KA
dnmbp	0	0.751123	0.476	0.019	0	KA
si:dkey-208c12.2	0	0.750466	0.337	0.002	0	KA
ldlrad2	0	0.748176	0.479	0.016	0	KA
fam84b	0	0.707872	0.473	0.018	0	KA
rassf7b	0	0.688232	0.439	0.002	0	KA
stac	0	0.676849	0.382	0.003	0	KA
gpx3	0	0.597307	0.371	0.005	0	KA
si:ch1073-345a8.1	0	0.590794	0.433	0.003	0	KA
dcdc2b	0	0.552087	0.343	0.003	0	KA
irf6	0	0.514165	0.343	0.002	0	KA
atp11a	5.16567e-307	1.22605	0.714	0.073	1.20644e-302	KA
adgrg1	1.43771e-302	0.938252	0.552	0.034	3.35777e-298	KA
cgnl1	1.05914e-301	0.512025	0.326	0.003	2.47363e-297	KA
LOC101884238	5.7592e-300	0.432789	0.3	0.001	1.34506e-295	KA
foxa2	2.36208e-298	0.892858	0.314	0.002	5.51663e-294	KA
egr3	6.8598e-298	0.663819	0.374	0.008	1.60211e-293	KA
tent5ba	1.04669e-297	1.90825	0.759	0.095	2.44455e-293	KA
RALGDS	1.07252e-294	0.932946	0.552	0.036	2.50487e-290	KA
gad2	1.40063e-290	2.48068	0.946	0.195	3.27118e-286	KA
foxj1b	2.84396e-286	0.454032	0.309	0.003	6.64207e-282	KA
RAMP1	4.88679e-285	1.36647	0.748	0.092	1.14131e-280	KA
gata2a	4.51308e-281	0.997419	0.592	0.045	1.05403e-276	KA
kcnab1a	1.68931e-277	0.780172	0.448	0.021	3.94537e-273	KA
pkib	5.38289e-277	1.08192	0.652	0.066	1.25717e-272	KA
insm1a	1.09255e-276	1.87104	0.807	0.127	2.55165e-272	KA
sdc4	2.19656e-274	1.7859	0.847	0.143	5.13006e-270	KA
igfbp5a	1.60297e-268	0.653565	0.314	0.005	3.74374e-264	KA
kcnf1a	2.11515e-262	0.848035	0.569	0.047	4.93992e-258	KA
XLOC-041436	2.29416e-258	0.688979	0.394	0.016	5.35801e-254	KA
ntn1b	1.0922e-255	0.722807	0.484	0.031	2.55083e-251	KA
RASGRF1	1.20276e-251	1.22273	0.714	0.098	2.80904e-247	KA
si:ch1073-70f20.1	4.20898e-251	4.60517	0.558	0.054	9.83007e-247	KA
sox1a	6.08614e-251	0.492485	0.309	0.006	1.42142e-246	KA
sst1.1	2.22429e-247	4.60274	0.493	0.038	5.19483e-243	KA
ptpn13	5.80139e-243	0.687172	0.388	0.017	1.35491e-238	KA
si:dkey-187e18.1	3.15059e-242	0.664941	0.414	0.021	7.3582e-238	KA
si:ch211-176l24.4	4.27895e-239	0.609525	0.34	0.011	9.99349e-235	KA
scg3	4.32983e-239	2.14263	0.904	0.24	1.01123e-234	KA
nrip2	3.58419e-238	0.538809	0.365	0.014	8.37087e-234	KA
lama5	1.16242e-235	0.413619	0.306	0.007	2.71483e-231	KA
gad1b	3.86882e-235	1.33133	0.824	0.142	9.03564e-231	KA
rnf220b	4.9291e-233	0.461721	0.314	0.008	1.15119e-228	KA
ezrb	3.50755e-230	0.92771	0.603	0.069	8.19188e-226	KA
her6	1.37858e-226	1.27438	0.569	0.061	3.21967e-222	KA
gad1a	4.48138e-226	0.649158	0.408	0.023	1.04663e-221	KA
adgrd2	1.41591e-224	0.561174	0.419	0.025	3.30686e-220	KA
gch1	8.18582e-224	0.735269	0.34	0.013	1.9118e-219	KA
cyr61l2	1.16745e-221	1.08955	0.473	0.038	2.72659e-217	KA
crema	3.28931e-218	2.35386	0.958	0.346	7.68218e-214	KA
raver2	8.80515e-216	0.565947	0.399	0.024	2.05644e-211	KA
fosb	3.25644e-213	2.24911	0.935	0.294	7.60541e-209	KA
rem2	1.37027e-212	1.12961	0.646	0.091	3.20025e-208	KA
lrfn4b	1.65546e-211	0.972028	0.643	0.088	3.86632e-207	KA
cd164l2	1.21611e-210	0.461417	0.303	0.01	2.84022e-206	KA
cfap57	4.46462e-208	0.413322	0.32	0.013	1.04271e-203	KA
tent5d	2.0094e-206	1.46293	0.717	0.124	4.69296e-202	KA
kif19	8.8456e-204	0.669278	0.439	0.035	2.06589e-199	KA
map2k1	7.04183e-199	0.597368	0.425	0.033	1.64462e-194	KA
gata3	1.53639e-198	0.765715	0.501	0.048	3.58825e-194	KA
npr3	4.3171e-186	0.871751	0.493	0.055	1.00826e-181	KA
zbtb4	2.47025e-185	0.521628	0.365	0.024	5.76928e-181	KA
rasa4	2.96781e-179	0.510488	0.354	0.023	6.93131e-175	KA
gem	1.45783e-178	1.12514	0.547	0.075	3.40475e-174	KA
mef2aa	2.98533e-175	0.921712	0.586	0.089	6.97223e-171	KA
epb41l5	8.48256e-171	0.551617	0.382	0.031	1.9811e-166	KA
csrp2	2.24433e-170	0.630038	0.346	0.024	5.24164e-166	KA
fndc3a	5.51855e-170	0.913106	0.569	0.087	1.28886e-165	KA
arg2	7.15599e-169	1.21868	0.533	0.076	1.67128e-164	KA
mink1	4.53489e-168	0.710908	0.45	0.049	1.05912e-163	KA
txn	4.82491e-168	1.30406	0.649	0.124	1.12686e-163	KA
kif5c	1.28784e-166	0.68636	0.499	0.063	3.00775e-162	KA
jam3b	3.62061e-166	0.497469	0.351	0.026	8.45594e-162	KA
ucp2	3.47078e-164	0.951118	0.623	0.112	8.10601e-160	KA
necab1	5.61378e-159	0.4794	0.32	0.022	1.3111e-154	KA
fam19a1a	3.91862e-157	0.498092	0.368	0.032	9.15194e-153	KA
cpne7	1.91622e-156	0.505419	0.337	0.026	4.47534e-152	KA
sall1a	5.43047e-156	0.661658	0.479	0.061	1.26829e-151	KA
pam	2.47029e-152	0.931016	0.671	0.144	5.76937e-148	KA
erfl3	9.7165e-151	0.520522	0.329	0.026	2.26929e-146	KA
scg2b	1.44666e-150	2.01699	0.943	0.45	3.37867e-146	KA
pacrg	3.93394e-148	0.403192	0.331	0.026	9.18771e-144	KA
trib1	1.78262e-147	0.611218	0.399	0.044	4.16331e-143	KA
nr4a3	5.23061e-147	0.992987	0.612	0.122	1.22161e-142	KA
ptprna	2.54099e-145	1.11058	0.714	0.186	5.93447e-141	KA
foxj1a	4.2462e-145	0.718224	0.431	0.053	9.91699e-141	KA
rgs3b	5.18009e-145	0.554956	0.346	0.031	1.20981e-140	KA
sstr2a	3.56816e-142	0.8572	0.408	0.049	8.33344e-138	KA
errfi1a	1.98076e-138	0.654846	0.405	0.049	4.62606e-134	KA
ptbp3	9.37506e-138	1.39442	0.867	0.383	2.18955e-133	KA
urp1	1.49616e-131	6.06274	0.584	0.146	3.49428e-127	KA
mmel1	4.18517e-130	0.69156	0.377	0.044	9.77446e-126	KA
cadpsa	4.36072e-130	0.453428	0.365	0.041	1.01845e-125	KA
slc6a17	5.09188e-130	1.97776	0.856	0.35	1.18921e-125	KA
XLOC-004991	2.16336e-129	0.587395	0.334	0.034	5.05254e-125	KA
si:dkey-30j16.3	8.58379e-129	0.446938	0.331	0.033	2.00475e-124	KA
si:ch211-13k12.2	1.45712e-128	1.11861	0.578	0.123	3.40311e-124	KA
nwd2	5.93507e-128	0.878101	0.609	0.138	1.38614e-123	KA
msi2b	6.4613e-127	1.533	0.892	0.418	1.50904e-122	KA
fosl2	1.11239e-125	1.02462	0.677	0.182	2.59798e-121	KA
pdxkb	2.41611e-123	0.81974	0.55	0.109	5.64281e-119	KA
cacna2d2a	5.47455e-122	1.11939	0.816	0.287	1.27858e-117	KA
ptprn2	5.76389e-117	0.668281	0.513	0.1	1.34616e-112	KA
sqstm1	1.88969e-115	0.676582	0.456	0.079	4.41337e-111	KA
cxadr	1.2218e-114	0.457295	0.343	0.041	2.85351e-110	KA
si:dkey-205h13.1	1.77881e-112	0.621306	0.416	0.065	4.15441e-108	KA
gnai1	2.21877e-112	0.722712	0.592	0.143	5.18194e-108	KA
dusp5	3.80976e-112	0.559927	0.351	0.045	8.89769e-108	KA
magi3a	9.30143e-112	0.452248	0.371	0.051	2.17235e-107	KA
mob2a	1.0303e-111	1.1282	0.428	0.075	2.40627e-107	KA
CABZ01072885.1	3.29427e-110	0.484881	0.414	0.064	7.69377e-106	KA
clstn2	2.03358e-109	0.865177	0.686	0.195	4.74943e-105	KA
rhobtb1	1.73229e-107	0.589778	0.405	0.065	4.04576e-103	KA
rasgrp3	4.6612e-107	0.497278	0.351	0.048	1.08862e-102	KA
clu	1.97959e-106	0.81032	0.36	0.051	4.62334e-102	KA
gadd45ba	3.0728e-106	1.41795	0.799	0.321	7.17652e-102	KA
RASSF5	1.3811e-105	0.611154	0.442	0.081	3.22556e-101	KA
lrrn1	4.97656e-105	0.525113	0.414	0.07	1.16228e-100	KA
fosl1a	1.65757e-104	1.00954	0.626	0.176	3.87126e-100	KA
atp1a3b	6.13257e-104	1.0099	0.731	0.23	1.43226e-99	KA
ip6k2a	7.51119e-103	1.30867	0.731	0.307	1.75424e-98	KA
CABZ01072614.1	5.35677e-102	1.45427	0.997	0.994	1.25107e-97	KA
vgf	6.44018e-101	1.29496	0.85	0.391	1.5041e-96	KA
syngr3b	6.48225e-101	0.859823	0.694	0.228	1.51393e-96	KA
scn5lab	1.28733e-97	0.450291	0.351	0.052	3.00656e-93	KA
gpr137bb	4.3388e-96	0.597951	0.45	0.091	1.01333e-91	KA
spsb4a	2.91228e-94	0.608421	0.411	0.078	6.80163e-90	KA
stat3	1.99871e-93	0.922531	0.686	0.232	4.668e-89	KA
gpx4a	2.56863e-93	0.407551	0.34	0.051	5.99904e-89	KA
clic4	8.29171e-91	0.499461	0.399	0.075	1.93653e-86	KA
hmgb3a	1.66673e-89	-1.32606	0.547	0.877	3.89266e-85	KA
cited4a	1.00624e-87	1.0712	0.776	0.348	2.35007e-83	KA
pisd	1.61357e-87	0.53729	0.411	0.082	3.7685e-83	KA
midn	1.0096e-86	1.18303	0.907	0.586	2.35791e-82	KA
gucy1b1	8.43059e-86	0.38285	0.331	0.052	1.96896e-81	KA
phldb1b	8.69624e-86	0.443771	0.365	0.065	2.03101e-81	KA
camk2n1a	1.38476e-85	1.21484	0.85	0.441	3.23412e-81	KA
hrasb	5.38174e-84	0.618143	0.513	0.136	1.25691e-79	KA
ppm1ab	5.67887e-84	0.622214	0.507	0.132	1.3263e-79	KA
zgc:92140	1.90236e-81	0.66716	0.493	0.131	4.44297e-77	KA
sgsm2	4.12881e-81	0.628509	0.456	0.111	9.64283e-77	KA
cnn3a	5.44347e-81	0.673488	0.405	0.087	1.27132e-76	KA
itm2cb	4.38066e-80	0.959785	0.725	0.3	1.0231e-75	KA
nova2	5.69095e-79	-0.993476	0.705	0.936	1.32912e-74	KA
plk2b	7.60747e-79	0.409903	0.3	0.047	1.77672e-74	KA
atp1b1a	1.02399e-78	0.914797	0.595	0.185	2.39154e-74	KA
sema3aa	1.68539e-78	0.42302	0.351	0.064	3.93622e-74	KA
tubb2b	2.84928e-78	-1.1454	0.586	0.884	6.65449e-74	KA
nova1	1.10651e-77	-1.13161	0.218	0.726	2.58425e-73	KA
bag3	1.10697e-77	0.587716	0.314	0.053	2.58534e-73	KA
mycbp	2.08134e-77	0.386856	0.36	0.069	4.86097e-73	KA
dlg2	2.74779e-77	0.875471	0.442	0.112	6.41747e-73	KA
tnfaip2a	4.43528e-76	0.765799	0.459	0.119	1.03586e-71	KA
cdipt	1.03611e-75	0.382989	0.374	0.075	2.41982e-71	KA
mir22a	1.50527e-75	0.4561	0.329	0.059	3.51556e-71	KA
elavl4	1.91963e-75	-1.10152	0.734	0.939	4.4833e-71	KA
sat1a.2	2.86758e-74	1.03448	0.813	0.44	6.69724e-70	KA
pde10a	4.35769e-74	0.522824	0.465	0.12	1.01774e-69	KA
spock2	6.92907e-74	0.92857	0.776	0.395	1.61828e-69	KA
XR-002458691.1	1.68249e-72	1.15649	0.98	0.904	3.92944e-68	KA
hsdl2	1.80468e-72	0.394469	0.32	0.059	4.21483e-68	KA
pcsk1nl	2.80729e-72	0.826604	0.745	0.348	6.55642e-68	KA
sgsm3	4.43406e-72	0.454525	0.397	0.09	1.03558e-67	KA
gadd45bb	2.20059e-71	0.54053	0.351	0.072	5.13948e-67	KA
usp2a	1.56209e-70	0.590972	0.487	0.139	3.64827e-66	KA
tuba1c	6.03929e-70	-1.31486	0.55	0.847	1.41048e-65	KA
slc6a6b	4.78725e-68	0.464769	0.428	0.107	1.11806e-63	KA
higd1a	1.06286e-64	0.738322	0.688	0.289	2.48232e-60	KA
cpe	2.02127e-63	0.929713	0.867	0.553	4.72067e-59	KA
ptp4a2b	2.2495e-63	0.634121	0.55	0.195	5.25371e-59	KA
nr4a1	7.27731e-63	0.867832	0.578	0.216	1.69962e-58	KA
kcnab2a	1.49789e-62	0.447343	0.569	0.193	3.49831e-58	KA
CSDC2 (1 of many)	1.54697e-62	0.746591	0.558	0.198	3.61294e-58	KA
sall3b	1.56317e-62	0.388783	0.309	0.062	3.65079e-58	KA
myt1b	1.78813e-62	-1.02764	0.36	0.761	4.17617e-58	KA
junba	3.15153e-62	0.659659	0.53	0.179	7.3604e-58	KA
msna	4.12601e-62	0.52572	0.408	0.108	9.6363e-58	KA
ctsla	2.57133e-61	0.694971	0.649	0.267	6.00534e-57	KA
il6st	1.72482e-60	0.468057	0.388	0.1	4.02833e-56	KA
rgs3a	2.65464e-60	0.938897	0.569	0.215	6.1999e-56	KA
esrra	7.84882e-60	0.639216	0.569	0.211	1.83309e-55	KA
slc7a14a	1.92369e-59	0.55192	0.493	0.161	4.49279e-55	KA
si:ch211-156j16.1	7.29724e-59	0.733489	0.507	0.17	1.70427e-54	KA
jak1	3.10056e-58	0.553712	0.425	0.123	7.24137e-54	KA
LOC101883507	2.94306e-57	0.6539	0.442	0.136	6.87351e-53	KA
slc35g2a	1.17682e-56	0.788671	0.717	0.345	2.74847e-52	KA
snap25b	1.52252e-55	-1.0354	0.176	0.605	3.55584e-51	KA
rnf220a	3.23914e-55	0.405324	0.408	0.113	7.56501e-51	KA
slc32a1	6.51637e-55	0.501252	0.805	0.331	1.5219e-50	KA
reep3b	8.78959e-55	0.385053	0.343	0.085	2.05281e-50	KA
rtn4a	1.15318e-54	0.680823	0.482	0.169	2.69326e-50	KA
nanos1	2.01319e-54	-1.19195	0.173	0.589	4.7018e-50	KA
olfm1b	2.33435e-53	-0.911947	0.125	0.554	5.45186e-49	KA
afdna	1.76493e-51	0.527062	0.547	0.214	4.12199e-47	KA
actb1	1.99881e-51	0.863473	0.887	0.609	4.66822e-47	KA
hmgn2	3.49887e-51	-0.953558	0.399	0.742	8.17162e-47	KA
pth1a	6.24368e-51	1.43791	0.535	0.222	1.45821e-46	KA
dscama	1.40845e-50	0.407511	0.45	0.145	3.28944e-46	KA
gpm6ab	2.7047e-50	0.708991	0.941	0.75	6.31683e-46	KA
si:ch73-1a9.3	4.48502e-50	-0.843201	0.844	0.941	1.04748e-45	KA
fam57ba	4.83417e-50	0.474706	0.467	0.164	1.12902e-45	KA
stmn1b	1.42271e-49	-0.929432	0.592	0.83	3.32274e-45	KA
ube2ql1	1.91773e-49	-0.834992	0.258	0.657	4.47886e-45	KA
znf704	3.60313e-49	-0.861782	0.17	0.592	8.41512e-45	KA
ivns1abpa	8.75312e-49	0.582537	0.544	0.221	2.04429e-44	KA
hivep1	1.20264e-48	0.794293	0.555	0.242	2.80878e-44	KA
syngr1a	1.90928e-48	0.506184	0.487	0.181	4.45912e-44	KA
syt2a	2.61249e-48	-1.17907	0.388	0.71	6.10148e-44	KA
ddx5	3.89697e-48	0.746662	0.788	0.489	9.10138e-44	KA
ccnl1a	6.32283e-48	0.624094	0.603	0.289	1.4767e-43	KA
kif1aa	1.77023e-47	-0.708909	0.187	0.581	4.13436e-43	KA
hoxd3a	2.01995e-47	-0.826016	0.297	0.665	4.7176e-43	KA
sik2b	3.69578e-47	0.407739	0.363	0.106	8.63149e-43	KA
oip5-as1	5.3041e-47	-0.73743	0.136	0.535	1.23877e-42	KA
si:dkey-151g10.6	6.69785e-47	-0.862296	0.977	0.992	1.56428e-42	KA
rbfox3a	9.95945e-47	-1.02209	0.144	0.535	2.32603e-42	KA
stmn4l	1.32586e-46	0.887397	0.841	0.58	3.09655e-42	KA
CR936968.2	4.11798e-46	0.544203	0.453	0.163	9.61753e-42	KA
epha4b	4.48673e-46	-0.941004	0.153	0.545	1.04788e-41	KA
h2afx1	7.04183e-46	-0.924636	0.694	0.859	1.64462e-41	KA
zfhx3	1.73027e-45	-1.11996	0.156	0.53	4.04105e-41	KA
elavl3	2.99068e-45	-0.685591	0.949	0.98	6.98474e-41	KA
lrrc4ba	3.08148e-45	0.607615	0.598	0.274	7.19679e-41	KA
jund	3.86632e-44	0.848991	0.833	0.606	9.02978e-40	KA
npdc1b	4.29357e-44	0.481085	0.391	0.13	1.00276e-39	KA
kcnc3a	4.6318e-44	-1.07616	0.17	0.544	1.08176e-39	KA
vsnl1b	5.49023e-44	-1.0656	0.255	0.598	1.28224e-39	KA
b3gat1a	1.23603e-43	0.511508	0.524	0.214	2.88674e-39	KA
rab11fip4a	1.54891e-43	0.507062	0.547	0.235	3.61747e-39	KA
LOC110439372	2.59705e-43	0.706061	1	0.997	6.06541e-39	KA
dusp4	3.42202e-43	0.574748	0.445	0.166	7.99214e-39	KA
rpl32	1.88819e-42	-0.806018	0.737	0.902	4.40987e-38	KA
rps20	2.78241e-42	-0.869652	0.68	0.858	6.49832e-38	KA
cbx7a	3.71991e-42	1.28079	0.717	0.43	8.68786e-38	KA
ptmab	5.68134e-41	-0.63957	0.989	0.989	1.32688e-36	KA
mknk1	1.15261e-40	0.403053	0.346	0.108	2.69193e-36	KA
dab2ipb	1.44011e-40	0.464363	0.527	0.221	3.36337e-36	KA
fam168a	2.89148e-40	-0.671096	0.476	0.764	6.75305e-36	KA
tox	3.45038e-40	-0.680478	0.144	0.511	8.05836e-36	KA
slc2a3a	5.37937e-40	0.568034	0.674	0.345	1.25635e-35	KA
rbfox1	7.15614e-40	-0.795531	0.19	0.54	1.67132e-35	KA
eef1g	7.33382e-40	-0.699083	0.436	0.75	1.71281e-35	KA
jpt1b	1.3844e-39	-0.668391	0.34	0.668	3.23327e-35	KA
rpl37	2.34666e-39	-0.767628	0.864	0.931	5.48062e-35	KA
XLOC-026010	5.74858e-39	0.380322	0.365	0.122	1.34258e-34	KA
si:dkey-175g6.2	8.86594e-39	0.517689	0.544	0.23	2.07064e-34	KA
rps3a	9.55843e-39	-0.729641	0.615	0.833	2.23237e-34	KA
ybx1	4.09554e-38	-0.630195	0.581	0.824	9.56514e-34	KA
si:dkey-7j14.5	6.83543e-38	-0.786003	0.076	0.424	1.59641e-33	KA
rap1b	7.03395e-38	0.393633	0.354	0.118	1.64278e-33	KA
robo2	8.86508e-38	-0.826315	0.181	0.524	2.07044e-33	KA
aplp1	2.22041e-37	-0.712013	0.343	0.659	5.18576e-33	KA
pcdh7a	3.35874e-37	-0.696932	0.091	0.432	7.84433e-33	KA
sox4a	6.38477e-37	-1.25677	0.173	0.504	1.49116e-32	KA
ckmt1	1.90207e-36	-0.642988	0.048	0.388	4.44229e-32	KA
wu:fb55g09	2.47709e-36	-0.698543	0.244	0.575	5.78524e-32	KA
ptmaa	3.24919e-36	-0.609513	0.986	0.988	7.58848e-32	KA
sncgb	3.91053e-36	-1.35514	0.728	0.815	9.13304e-32	KA
rpl18	5.21404e-36	-0.71633	0.688	0.837	1.21774e-31	KA
hmgb1a	7.58649e-36	-0.676932	0.779	0.897	1.77182e-31	KA
mir132-2	1.286e-35	0.629324	0.541	0.253	3.00346e-31	KA
grin1a	3.45309e-35	-0.693274	0.068	0.398	8.06468e-31	KA
sik1	4.23778e-35	0.637383	0.567	0.283	9.89733e-31	KA
foxo3b	8.20486e-35	-0.585956	0.108	0.442	1.91625e-30	KA
marcksb	2.45693e-34	-0.583104	0.153	0.482	5.73817e-30	KA
si:ch211-196l7.4	3.97596e-34	-0.659082	0.606	0.817	9.28584e-30	KA
xbp1	5.34553e-34	0.679404	0.734	0.46	1.24845e-29	KA
si:ch73-386h18.1	5.49124e-34	-0.799532	0.241	0.549	1.28248e-29	KA
serpini1	7.64854e-34	0.495125	0.467	0.21	1.78632e-29	KA
tmsb4x	8.18839e-34	-0.657001	0.904	0.967	1.9124e-29	KA
marcksl1a	1.7388e-33	-0.789439	0.337	0.629	4.06098e-29	KA
CR786577.1	1.97065e-33	0.535981	0.411	0.17	4.60246e-29	KA
rps12	2.68263e-33	-0.788529	0.734	0.852	6.26528e-29	KA
rps14	2.94275e-33	-0.698797	0.739	0.875	6.8728e-29	KA
rps15	3.27425e-33	-0.651622	0.773	0.884	7.64701e-29	KA
ndufa4	6.27282e-33	-0.769197	0.11	0.424	1.46502e-28	KA
gap43	8.49703e-33	-0.930666	0.218	0.524	1.98448e-28	KA
hoxd10a	1.28838e-32	-0.687439	0.074	0.389	3.009e-28	KA
prnprs3	1.90554e-32	0.481543	0.459	0.207	4.45039e-28	KA
eif4ebp1	3.92978e-32	-0.549369	0.102	0.42	9.17801e-28	KA
fosab	5.31635e-32	1.03564	0.864	0.724	1.24163e-27	KA
sh3bp5la	5.7165e-32	0.452884	0.391	0.157	1.33509e-27	KA
znf503	6.53042e-32	-0.628638	0.079	0.39	1.52518e-27	KA
rpl35	9.15557e-32	-0.663924	0.754	0.871	2.13828e-27	KA
hnrnpaba	1.08488e-31	-0.569572	0.637	0.813	2.53374e-27	KA
golga7ba	1.24643e-31	-0.571807	0.193	0.509	2.91103e-27	KA
ywhah	1.27788e-31	-0.598493	0.657	0.823	2.98449e-27	KA
faua	1.28166e-31	-0.688106	0.805	0.895	2.99333e-27	KA
rpl30	2.34456e-31	-0.694851	0.669	0.84	5.47572e-27	KA
ptn	3.73518e-31	0.505457	0.303	0.103	8.72352e-27	KA
gjd1a	3.81087e-31	-0.597772	0.139	0.448	8.90028e-27	KA
jun	4.26454e-31	0.732098	0.881	0.659	9.95983e-27	KA
glra1	4.42539e-31	-0.57904	0.085	0.392	1.03355e-26	KA
baz2ba	4.52903e-31	-0.585589	0.303	0.606	1.05776e-26	KA
rrad	4.68923e-31	0.633558	0.535	0.261	1.09517e-26	KA
gpr185b	4.79279e-31	0.522598	0.397	0.168	1.11936e-26	KA
zgc:153704	6.23401e-31	0.565804	0.442	0.197	1.45595e-26	KA
rpl31	1.03712e-30	-0.592103	0.813	0.903	2.4222e-26	KA
cspg5a	1.4626e-30	-0.583601	0.125	0.432	3.41589e-26	KA
hsp90ab1	2.4963e-30	-0.493565	0.98	0.985	5.83011e-26	KA
rpl39	2.65072e-30	-0.682378	0.864	0.927	6.19075e-26	KA
zgc:114188	4.01542e-30	-0.601714	0.7	0.853	9.37802e-26	KA
fscn1a	4.73325e-30	-0.481478	0.102	0.404	1.10545e-25	KA
rack1	5.51792e-30	-0.608672	0.555	0.775	1.28871e-25	KA
rpl36a	5.58956e-30	-0.69715	0.864	0.92	1.30544e-25	KA
nr2f1a	7.1682e-30	-0.758433	0.091	0.39	1.67413e-25	KA
vsnl1a	8.30423e-30	-0.575889	0.051	0.343	1.93945e-25	KA
CT583728.23	1.10351e-29	0.420772	0.51	0.251	2.57726e-25	KA
rpl19	1.51771e-29	-0.653884	0.796	0.889	3.54462e-25	KA
rpl27a	3.27337e-29	-0.674729	0.433	0.682	7.64496e-25	KA
prr12b	4.41225e-29	-0.505049	0.17	0.471	1.03048e-24	KA
tmsb	4.62201e-29	-0.712177	0.136	0.428	1.07947e-24	KA
nrn1a	4.70125e-29	-1.01912	0.116	0.403	1.09798e-24	KA
fabp3	5.25512e-29	-0.623809	0.456	0.698	1.22733e-24	KA
FO082781.1	7.20807e-29	-0.648243	0.102	0.4	1.68345e-24	KA
gabrb4	9.96496e-29	-0.522894	0.167	0.468	2.32732e-24	KA
tuba2	2.19857e-28	-0.560756	0.365	0.635	5.13476e-24	KA
trarg1a	2.52599e-28	-0.761753	0.068	0.351	5.89946e-24	KA
adcyap1b	2.78331e-28	-0.963639	0.15	0.436	6.50041e-24	KA
cadm3	9.26291e-28	-0.518939	0.289	0.574	2.16335e-23	KA
zfhx4	9.45464e-28	-0.885798	0.17	0.448	2.20813e-23	KA
rpl36	1.2522e-27	-0.60694	0.802	0.885	2.92452e-23	KA
si:ch211-195b15.8	1.29493e-27	0.839428	0.785	0.637	3.0243e-23	KA
spry4	1.33437e-27	0.621093	0.533	0.3	3.11641e-23	KA
syt2b	1.90152e-27	-0.965019	0.125	0.4	4.441e-23	KA
rps15a	2.95123e-27	-0.663882	0.79	0.874	6.8926e-23	KA
rpl7a	4.26137e-27	-0.587101	0.615	0.794	9.95244e-23	KA
rps21	4.76859e-27	-0.603114	0.853	0.921	1.1137e-22	KA
h3f3d	1.06446e-26	-0.542318	0.921	0.952	2.48604e-22	KA
rplp1	1.21597e-26	-0.803338	0.844	0.895	2.83989e-22	KA
scn8aa	1.25828e-26	-0.53433	0.201	0.481	2.93872e-22	KA
esrrga	1.73594e-26	-0.855581	0.088	0.361	4.05428e-22	KA
rps25	4.62682e-26	-0.533179	0.856	0.914	1.08059e-21	KA
vdac2	6.03709e-26	-0.570981	0.295	0.551	1.40996e-21	KA
naca	6.41356e-26	-0.599307	0.671	0.815	1.49789e-21	KA
stmn2a	7.13667e-26	-0.899947	0.414	0.619	1.66677e-21	KA
ca10a	7.23721e-26	0.396884	0.306	0.117	1.69025e-21	KA
kcna1a	9.85138e-26	-0.529668	0.042	0.304	2.30079e-21	KA
ywhag1	1.04449e-25	-0.627877	0.232	0.5	2.4394e-21	KA
nat8l	2.17213e-25	-0.681323	0.173	0.441	5.073e-21	KA
meis2a	2.80906e-25	-0.515757	0.091	0.358	6.56055e-21	KA
sumo2b	3.25059e-25	-0.449314	0.19	0.469	7.59176e-21	KA
rps23	4.94548e-25	-0.62583	0.796	0.88	1.15502e-20	KA
qkia	7.83548e-25	-0.531303	0.127	0.395	1.82998e-20	KA
myt1la	8.42212e-25	-0.436699	0.054	0.312	1.96699e-20	KA
pou2f2a	8.52461e-25	-0.589743	0.156	0.421	1.99092e-20	KA
si:ch211-222l21.1	1.11532e-24	-0.730238	0.734	0.826	2.60484e-20	KA
cbx1b	1.35088e-24	-0.490662	0.176	0.447	3.15498e-20	KA
rpl7	1.45421e-24	-0.548667	0.592	0.794	3.39631e-20	KA
islr2	1.8335e-24	-0.676222	0.076	0.339	4.28214e-20	KA
LOC110439627	1.85895e-24	0.424472	0.694	0.442	4.34158e-20	KA
dyrk1b	1.96962e-24	0.401576	0.484	0.248	4.60004e-20	KA
rps7	2.52496e-24	-0.54999	0.739	0.836	5.89705e-20	KA
scrt2	3.03675e-24	-0.412031	0.062	0.319	7.09232e-20	KA
chd3	3.95183e-24	-0.45758	0.136	0.402	9.2295e-20	KA
pcloa	4.54683e-24	-0.46618	0.249	0.523	1.06191e-19	KA
rps4x	4.59233e-24	-0.576425	0.623	0.781	1.07254e-19	KA
lhx1a	8.04753e-24	-0.662507	0.119	0.375	1.8795e-19	KA
ppp3r1a	9.54381e-24	-0.636624	0.363	0.591	2.22896e-19	KA
hmgn7	1.38978e-23	-0.479367	0.544	0.727	3.24582e-19	KA
rpl17	1.76741e-23	-0.585432	0.776	0.872	4.1278e-19	KA
nrxn1a	3.19935e-23	-0.644222	0.261	0.504	7.47209e-19	KA
btf3	3.32872e-23	-0.584969	0.578	0.742	7.77423e-19	KA
zgc:110158	3.43008e-23	-0.46583	0.255	0.515	8.01095e-19	KA
marcksl1b	4.76547e-23	-0.527062	0.969	0.969	1.11298e-18	KA
pde4ba	4.80942e-23	-0.418101	0.122	0.384	1.12324e-18	KA
rpl9	7.04096e-23	-0.530376	0.652	0.805	1.64442e-18	KA
rpl22	1.02522e-22	-0.548468	0.686	0.814	2.39441e-18	KA
rps5	1.07423e-22	-0.54347	0.66	0.809	2.50886e-18	KA
macf1a	1.47681e-22	0.420485	0.518	0.294	3.4491e-18	KA
atp1b3b	1.77136e-22	-0.615043	0.278	0.511	4.137e-18	KA
rps27.1	2.24612e-22	-0.569586	0.799	0.878	5.24582e-18	KA
ywhag2	2.50158e-22	-0.703042	0.739	0.793	5.84245e-18	KA
foxn3	2.73681e-22	-0.382419	0.065	0.311	6.39183e-18	KA
nptna	3.35331e-22	-0.646578	0.235	0.466	7.83166e-18	KA
gabrg2	4.21388e-22	-0.446802	0.187	0.444	9.84152e-18	KA
myca	5.68153e-22	0.405756	0.354	0.161	1.32692e-17	KA
rerea	6.42216e-22	-0.448765	0.28	0.526	1.4999e-17	KA
ank1b	6.97613e-22	-0.399957	0.065	0.304	1.62928e-17	KA
ppiab	9.06244e-22	-0.613858	0.836	0.856	2.11653e-17	KA
map1aa	1.76459e-21	-0.589942	0.334	0.553	4.1212e-17	KA
atf7ip	2.25911e-21	-0.548537	0.414	0.622	5.27616e-17	KA
rpl29	2.52978e-21	-0.496057	0.788	0.858	5.9083e-17	KA
hpca	3.55667e-21	-0.480614	0.071	0.303	8.30659e-17	KA
rps10	4.20036e-21	-0.49272	0.807	0.865	9.80993e-17	KA
ptprga	4.28614e-21	-0.562366	0.201	0.446	1.00103e-16	KA
mab21l2	5.65247e-21	-0.938662	0.144	0.374	1.32013e-16	KA
meis2b	6.22819e-21	-0.466024	0.085	0.321	1.45459e-16	KA
nfil3-5	7.20639e-21	-0.562723	0.204	0.444	1.68305e-16	KA
rps2	7.33584e-21	-0.494457	0.686	0.814	1.71329e-16	KA
kdm1a	8.81502e-21	-0.40237	0.227	0.478	2.05875e-16	KA
hoxb3a	1.11334e-20	-0.487081	0.19	0.427	2.60021e-16	KA
nme2b.1	1.36013e-20	-0.535809	0.595	0.742	3.17659e-16	KA
basp1	1.36131e-20	-0.408846	0.153	0.396	3.17934e-16	KA
bach2b	2.76049e-20	-0.414211	0.15	0.389	6.44713e-16	KA
irf2bpl	2.79153e-20	0.397308	0.674	0.468	6.51961e-16	KA
ier5l	2.94861e-20	-0.44167	0.142	0.378	6.88648e-16	KA
mknk2b	3.10119e-20	-0.706035	0.612	0.767	7.24283e-16	KA
rtn1b	3.85363e-20	-0.515257	0.442	0.637	9.00015e-16	KA
appb	5.40833e-20	-0.54338	0.411	0.598	1.26312e-15	KA
scn8ab	5.81944e-20	-0.49928	0.116	0.344	1.35913e-15	KA
rsf1b.1	7.75711e-20	-0.392737	0.105	0.338	1.81167e-15	KA
atp2b2	8.15969e-20	-0.47663	0.17	0.404	1.9057e-15	KA
rhoab	8.86225e-20	-0.440831	0.178	0.412	2.06978e-15	KA
cdk5r1b	9.02899e-20	-0.435394	0.221	0.455	2.10872e-15	KA
tmeff1b	9.30077e-20	-0.392583	0.235	0.477	2.17219e-15	KA
hmgn6	1.17009e-19	-0.477089	0.589	0.748	2.73273e-15	KA
rps13	1.21929e-19	-0.491309	0.79	0.856	2.84766e-15	KA
csnk1a1	1.29594e-19	0.390569	0.833	0.685	3.02667e-15	KA
rpl38	1.36515e-19	-0.535337	0.858	0.897	3.18831e-15	KA
hoxa11b	1.52189e-19	-0.544239	0.113	0.338	3.55438e-15	KA
rpl21	2.22813e-19	-0.512689	0.731	0.827	5.2038e-15	KA
atp2b3a	2.5321e-19	-0.546245	0.329	0.533	5.91371e-15	KA
stx1b	2.61322e-19	-0.674065	0.867	0.846	6.10318e-15	KA
hmgb1b	2.93785e-19	-0.47411	0.708	0.813	6.86134e-15	KA
atp1a1a.1	2.94281e-19	-0.679562	0.402	0.598	6.87294e-15	KA
nr2f2	3.04836e-19	-0.500369	0.085	0.304	7.11944e-15	KA
pou3f3b	3.38556e-19	-0.523571	0.218	0.45	7.90697e-15	KA
ncl	3.73209e-19	-0.453449	0.354	0.579	8.7163e-15	KA
cplx2	3.74221e-19	-0.478482	0.193	0.424	8.73994e-15	KA
slit3	4.43796e-19	-0.624332	0.13	0.351	1.03648e-14	KA
rps26l	4.81597e-19	-0.512836	0.762	0.827	1.12477e-14	KA
rpl34	5.61938e-19	-0.518423	0.697	0.796	1.31241e-14	KA
rps29	5.69412e-19	-0.457864	0.924	0.955	1.32986e-14	KA
hunk	7.06227e-19	-0.50692	0.088	0.303	1.64939e-14	KA
hist2h2l	8.27298e-19	-0.596833	0.343	0.548	1.93215e-14	KA
h3f3a	8.34304e-19	-0.417774	0.847	0.896	1.94852e-14	KA
si:ch211-153j24.3	9.61637e-19	0.668503	0.535	0.34	2.2459e-14	KA
ip6k2b	1.00021e-18	0.483031	0.516	0.327	2.336e-14	KA
dido1	1.06955e-18	-0.404041	0.309	0.537	2.49792e-14	KA
rai1	1.18435e-18	-0.415127	0.178	0.407	2.76605e-14	KA
ptpn5	1.34315e-18	0.391614	0.414	0.225	3.13694e-14	KA
kdm6bb	1.50658e-18	-0.455133	0.292	0.514	3.51862e-14	KA
cicb	1.69654e-18	0.392549	0.55	0.338	3.96227e-14	KA
rpl14	1.72668e-18	-0.487038	0.805	0.854	4.03267e-14	KA
anp32a	2.06731e-18	-0.437733	0.439	0.637	4.82821e-14	KA
CABZ01029822.1	2.23715e-18	0.773594	0.425	0.25	5.22487e-14	KA
atp1b1b	2.25764e-18	0.628901	0.535	0.33	5.27271e-14	KA
rpl10a	2.49987e-18	-0.523892	0.62	0.767	5.83844e-14	KA
vamp1a	2.63424e-18	-0.761658	0.312	0.499	6.15227e-14	KA
atp5fa1	3.35166e-18	-0.521769	0.388	0.573	7.82781e-14	KA
zc4h2	3.76079e-18	-0.414172	0.241	0.464	8.78332e-14	KA
zgc:153426	3.85969e-18	-0.482583	0.215	0.434	9.0143e-14	KA
rpl35a	7.62705e-18	-0.463502	0.782	0.858	1.7813e-13	KA
rnf44	9.26277e-18	-0.401487	0.224	0.45	2.16332e-13	KA
ankrd12	1.03879e-17	-0.442182	0.453	0.648	2.4261e-13	KA
serbp1a	1.06864e-17	-0.452916	0.541	0.694	2.4958e-13	KA
h2afy2	1.4398e-17	-0.394628	0.337	0.544	3.36266e-13	KA
rps19	1.61257e-17	-0.466573	0.819	0.882	3.76615e-13	KA
ptprda	2.36275e-17	-0.50455	0.125	0.331	5.51821e-13	KA
cpeb4b	2.56173e-17	0.392857	0.589	0.385	5.98293e-13	KA
si:ch211-288g17.3	3.17262e-17	-0.382947	0.266	0.485	7.40965e-13	KA
rpl8	3.36412e-17	-0.491751	0.745	0.827	7.8569e-13	KA
rps27a	3.93898e-17	-0.451011	0.822	0.888	9.19949e-13	KA
rps24	4.74191e-17	-0.459475	0.813	0.877	1.10747e-12	KA
idh2	1.70509e-16	-0.479941	0.317	0.508	3.98223e-12	KA
hmga1a	2.21262e-16	-0.460166	0.391	0.593	5.16757e-12	KA
gnb1a	2.87164e-16	-0.423897	0.578	0.72	6.70671e-12	KA
rpl12	3.02463e-16	-0.531973	0.694	0.796	7.06403e-12	KA
rpl10	3.02956e-16	-0.492069	0.782	0.825	7.07554e-12	KA
hp1bp3	3.33174e-16	-0.395055	0.402	0.589	7.78128e-12	KA
tubb5	3.53535e-16	-0.609403	0.142	0.341	8.25681e-12	KA
hoxa9b	4.27014e-16	-0.465488	0.295	0.489	9.97292e-12	KA
rpl27	4.371e-16	-0.463145	0.66	0.785	1.02085e-11	KA
ubc	7.90644e-16	0.559299	0.799	0.693	1.84655e-11	KA
slc25a5	1.6364e-15	-0.49174	0.938	0.952	3.8218e-11	KA
rps16	1.63757e-15	-0.455449	0.7	0.791	3.82454e-11	KA
rpl13	2.44171e-15	-0.425253	0.748	0.826	5.70261e-11	KA
rpl15	2.542e-15	-0.460041	0.569	0.7	5.93684e-11	KA
rps8a	2.61944e-15	-0.456873	0.694	0.805	6.11771e-11	KA
lnx1	3.51122e-15	0.565849	0.456	0.301	8.20045e-11	KA
hoxc10a	4.23826e-15	-0.381822	0.144	0.337	9.89846e-11	KA
tnrc6c1	4.50018e-15	-0.399946	0.414	0.611	1.05102e-10	KA
pik3r3b	5.14655e-15	-0.773522	0.544	0.639	1.20198e-10	KA
rpl13a	7.72391e-15	-0.428824	0.805	0.862	1.80392e-10	KA
atp5mc3b	7.90312e-15	-0.636896	0.55	0.664	1.84577e-10	KA
rps3	9.22848e-15	-0.422679	0.564	0.696	2.15531e-10	KA
edil3a	9.23715e-15	-0.601857	0.229	0.407	2.15734e-10	KA
cplx2l	9.54846e-15	-0.701872	0.416	0.557	2.23004e-10	KA
rplp2l	1.08227e-14	-0.533861	0.649	0.756	2.52765e-10	KA
sox11b	1.19134e-14	-0.704952	0.139	0.323	2.78239e-10	KA
tmem59l	2.21636e-14	-0.403731	0.337	0.512	5.1763e-10	KA
ephb3	3.17188e-14	-0.409746	0.142	0.332	7.40794e-10	KA
ank2b	7.81299e-14	-0.396788	0.436	0.604	1.82472e-09	KA
rps9	8.13543e-14	-0.468907	0.688	0.769	1.90003e-09	KA
calm2a	1.53575e-13	-0.418325	0.728	0.802	3.58674e-09	KA
clta	4.6228e-13	-0.396926	0.275	0.443	1.07965e-08	KA
atp2b4	5.28753e-13	-0.597101	0.385	0.526	1.2349e-08	KA
zgc:65894	6.41374e-13	-0.463656	0.462	0.596	1.49793e-08	KA
pacsin1a	6.97045e-13	-0.453598	0.448	0.58	1.62795e-08	KA
ppiaa	9.95581e-13	-0.386829	0.431	0.576	2.32518e-08	KA
gng3	1.37087e-12	-0.412255	0.575	0.691	3.20168e-08	KA
rpl18a	1.39812e-12	-0.398759	0.703	0.801	3.26531e-08	KA
hoxa10b	1.99661e-12	-0.445193	0.193	0.358	4.66307e-08	KA
ckbb	4.34825e-12	-0.557074	0.751	0.783	1.01553e-07	KA
rpl23	1.02379e-11	-0.486612	0.822	0.853	2.39107e-07	KA
cox4i1	1.04493e-11	-0.481209	0.524	0.618	2.44044e-07	KA
mdkb	1.32748e-11	0.558841	0.657	0.551	3.10034e-07	KA
vdrb	1.8368e-11	0.3993	0.569	0.42	4.28984e-07	KA
atp5mf	2.47925e-11	-0.401827	0.402	0.535	5.79029e-07	KA
klf6a	2.87178e-11	-0.400545	0.351	0.534	6.70705e-07	KA
rpl26	3.82019e-11	-0.41684	0.765	0.82	8.92204e-07	KA
dnajb1b	6.11508e-11	-1.32705	0.391	0.519	1.42818e-06	KA
btg2	8.0576e-11	0.393316	0.476	0.332	1.88185e-06	KA
atp1b2a	1.24119e-10	-0.532682	0.626	0.681	2.8988e-06	KA
atp2b3b	2.37288e-10	-0.387122	0.266	0.407	5.54186e-06	KA
nr4a2a	1.41916e-256	1.6672	0.695	0.049	3.31445e-252	dI2
foxd3	1.21058e-162	1.65907	0.711	0.088	2.82731e-158	dI2
nr4a2b	2.49204e-113	1.02246	0.513	0.064	5.82016e-109	dI2
pou4f2	1.57072e-107	0.635847	0.385	0.035	3.66841e-103	dI2
foxp2	3.40521e-102	1.76614	0.754	0.18	7.95287e-98	dI2
hmx3a	1.79576e-77	0.819619	0.417	0.06	4.194e-73	dI2
pou4f1	2.18283e-75	0.7946	0.348	0.042	5.09799e-71	dI2
lhx5	1.06852e-52	0.890374	0.69	0.234	2.49554e-48	dI2
nrn1a	1.11288e-47	1.0038	0.861	0.365	2.59912e-43	dI2
slc17a6b	9.00847e-45	0.879366	0.695	0.258	2.10393e-40	dI2
r3hdm1	3.85468e-41	0.606922	0.508	0.151	9.00259e-37	dI2
si:ch73-386h18.1	1.80006e-40	0.967767	0.888	0.513	4.20403e-36	dI2
si:ch211-106h4.9	3.27156e-40	0.501635	0.358	0.08	7.64072e-36	dI2
nos1apb	1.9203e-38	0.812515	0.615	0.239	4.48487e-34	dI2
bdnf	3.94631e-34	0.58259	0.465	0.143	9.2166e-30	dI2
slc17a6a	3.39868e-32	0.607688	0.551	0.196	7.93763e-28	dI2
pcdh11	3.44573e-29	0.70049	0.668	0.313	8.04751e-25	dI2
zfhx4	3.36529e-27	0.981234	0.765	0.416	7.85963e-23	dI2
cntnap2a	4.61487e-26	0.510071	0.492	0.191	1.0778e-21	dI2
fbrsl1	6.34855e-26	0.566106	0.561	0.25	1.4827e-21	dI2
NPAS3	2.57133e-25	0.550283	0.561	0.238	6.00534e-21	dI2
zfhx3	1.4761e-24	0.63104	0.834	0.491	3.44744e-20	dI2
brinp2	6.89136e-24	0.448094	0.326	0.1	1.60948e-19	dI2
foxp4	5.07002e-23	0.747373	0.599	0.288	1.1841e-18	dI2
jun	6.69679e-20	-1.23378	0.417	0.684	1.56404e-15	dI2
strbp	8.17298e-20	0.430356	0.631	0.312	1.9088e-15	dI2
rnd3a	1.7184e-17	0.494247	0.513	0.257	4.01333e-13	dI2
XLOC-035513	7.55069e-16	0.382251	0.422	0.19	1.76346e-11	dI2
ek1	7.15105e-15	0.397393	0.439	0.207	1.67013e-10	dI2
zgc:122979	9.61555e-15	0.486704	0.396	0.182	2.24571e-10	dI2
islr2	1.03986e-14	-0.728366	0.064	0.331	2.42859e-10	dI2
runx1t1	3.68599e-14	0.435506	0.487	0.262	8.60863e-10	dI2
mab21l2	4.40877e-14	-0.843492	0.102	0.368	1.02967e-09	dI2
cdk5r2a	2.13037e-13	0.456832	0.663	0.431	4.97547e-09	dI2
vgf	2.4627e-13	-0.887662	0.176	0.432	5.75163e-09	dI2
adcyap1b	5.49714e-13	0.512351	0.626	0.408	1.28386e-08	dI2
pcdh9	5.80257e-13	0.4493	0.572	0.341	1.35519e-08	dI2
hoxd3a	6.71146e-13	0.501285	0.786	0.634	1.56746e-08	dI2
slc32a1	1.26125e-12	-0.96898	0.139	0.372	2.94566e-08	dI2
birc6-as2	1.66438e-12	0.430682	0.545	0.32	3.88716e-08	dI2
lrrc4bb	1.79655e-12	0.407375	0.572	0.353	4.19585e-08	dI2
syt1a	2.25342e-12	0.432726	0.679	0.436	5.26287e-08	dI2
mn1b	4.55825e-12	0.432992	0.428	0.23	1.06458e-07	dI2
hmgb3a	4.71275e-12	0.477343	0.941	0.85	1.10066e-07	dI2
ephb3	1.04544e-10	-0.469085	0.107	0.326	2.44162e-06	dI2
lhx9	0	1.93455	0.805	0.024	0	dI1
barhl2	3.99395e-229	2.36069	0.897	0.051	9.32786e-225	dI1
barhl1b	1.5053e-137	0.8425	0.506	0.025	3.51563e-133	dI1
LOC100537342	1.85922e-84	1.48709	0.609	0.068	4.34221e-80	dI1
ebf3a	2.69801e-60	1.82878	0.793	0.165	6.30121e-56	dI1
sox11b	1.78413e-44	2.22954	0.851	0.301	4.16684e-40	dI1
uncx	1.35702e-32	0.97945	0.552	0.128	3.16933e-28	dI1
CR383676.1	2.68494e-25	0.753631	1	1	6.27068e-21	dI1
gapdhs	2.3728e-20	-1.63353	0.54	0.835	5.54168e-16	dI1
mab21l2	2.9344e-20	1.17192	0.759	0.351	6.8533e-16	dI1
nrn1a	1.05784e-19	0.807424	0.839	0.375	2.47059e-15	dI1
zgc:194659	4.37054e-19	0.770134	0.448	0.137	1.02074e-14	dI1
elavl4	1.12428e-18	-1.06398	0.621	0.93	2.62576e-14	dI1
celf2	1.77176e-17	0.617225	0.621	0.24	4.13795e-13	dI1
zfhx4	3.71812e-17	0.937184	0.77	0.422	8.68367e-13	dI1
ppdpfb	3.99437e-17	1.40901	0.897	0.748	9.32884e-13	dI1
ddit3	1.59262e-16	0.82646	0.862	0.488	3.71957e-12	dI1
pcdh19	2.123e-16	0.552474	0.517	0.18	4.95827e-12	dI1
aldocb	2.35881e-16	-1.20264	0.31	0.689	5.509e-12	dI1
CR751227.2	2.39734e-16	0.444892	0.425	0.128	5.59898e-12	dI1
atp1a3a	3.5021e-16	-1.07527	0.138	0.596	8.17916e-12	dI1
rarga	1.72645e-15	0.584556	0.506	0.191	4.03213e-11	dI1
pacsin1a	1.97832e-15	-0.89849	0.149	0.578	4.62035e-11	dI1
ckbb	5.04614e-15	-1.08221	0.517	0.785	1.17853e-10	dI1
sncgb	6.67424e-15	-1.59767	0.598	0.812	1.55877e-10	dI1
calm1b	1.13144e-14	-1.52708	0.31	0.649	2.64247e-10	dI1
zfhx3	2.44665e-14	0.845717	0.805	0.499	5.71415e-10	dI1
tshz3b	4.65618e-14	0.563176	0.506	0.202	1.08745e-09	dI1
pik3r3b	8.58862e-14	0.789805	0.931	0.628	2.00587e-09	dI1
sncb	8.64857e-14	-1.25949	0.563	0.803	2.01987e-09	dI1
vsnl1b	8.67902e-14	-1.08824	0.184	0.581	2.02699e-09	dI1
hoxb3a	9.82667e-14	0.773618	0.69	0.406	2.29502e-09	dI1
cplx1	1.0708e-13	-1.16172	0.207	0.592	2.50086e-09	dI1
syt2a	1.30776e-13	-1.15673	0.356	0.694	3.05427e-09	dI1
cycsb	1.54141e-13	-1.01322	0.207	0.606	3.59996e-09	dI1
stmn2a	2.0641e-13	-1.14951	0.253	0.61	4.8207e-09	dI1
hoxb9a	6.67666e-13	0.799645	0.805	0.572	1.55933e-08	dI1
atp5fa1	8.31138e-13	-0.753922	0.172	0.567	1.94112e-08	dI1
atp6v0cb	8.34484e-13	-1.11885	0.563	0.76	1.94894e-08	dI1
cpeb2	1.13958e-12	-0.846501	0.184	0.56	2.66148e-08	dI1
ywhag2	2.39007e-12	-0.94552	0.552	0.793	5.58202e-08	dI1
gdf11	2.65174e-12	0.419427	0.333	0.105	6.19315e-08	dI1
atp1b2a	2.84573e-12	-0.9561	0.368	0.682	6.64619e-08	dI1
atp1b3b	3.61186e-12	-0.797153	0.115	0.502	8.4355e-08	dI1
adcyap1b	4.20387e-12	0.599014	0.747	0.41	9.81814e-08	dI1
rtn1b	4.97268e-12	-0.719293	0.264	0.63	1.16137e-07	dI1
si:ch211-195b13.1	7.05277e-12	-0.699128	0.057	0.442	1.64717e-07	dI1
hspa8	9.56058e-12	-0.648981	0.816	0.925	2.23287e-07	dI1
nfil3-5	1.22281e-11	0.666381	0.724	0.422	2.85587e-07	dI1
rps20	1.36851e-11	0.725575	0.92	0.844	3.19616e-07	dI1
khdrbs1b	1.93539e-11	0.588066	0.632	0.327	4.52011e-07	dI1
cox7b	1.95946e-11	-0.729131	0.207	0.58	4.57632e-07	dI1
atp1a1a.1	2.09614e-11	-0.929768	0.241	0.59	4.89553e-07	dI1
cox4i1	2.17141e-11	-0.771168	0.253	0.618	5.07133e-07	dI1
eno1a	2.27647e-11	-0.95872	0.161	0.509	5.31669e-07	dI1
atp6v0a1b	2.31489e-11	-0.661061	0.092	0.456	5.40643e-07	dI1
si:ch73-386h18.1	2.77145e-11	0.602413	0.793	0.522	6.47272e-07	dI1
pou3f2b	3.00078e-11	0.736593	0.563	0.282	7.00833e-07	dI1
znf704	3.54741e-11	0.83893	0.782	0.559	8.28497e-07	dI1
atp2b3a	3.80024e-11	-0.757511	0.184	0.525	8.87545e-07	dI1
nptna	4.47875e-11	-0.797498	0.103	0.456	1.04601e-06	dI1
ldhba	4.846e-11	-0.642512	0.046	0.397	1.13178e-06	dI1
tob1a	5.00425e-11	-0.93664	0.414	0.706	1.16874e-06	dI1
atp2b4	5.95473e-11	-0.872529	0.172	0.522	1.39073e-06	dI1
slc25a5	6.48297e-11	-0.751141	0.851	0.953	1.5141e-06	dI1
atp6v1e1b	6.55956e-11	-0.832539	0.299	0.594	1.53199e-06	dI1
BX005003.1	8.42835e-11	0.807332	0.598	0.32	1.96844e-06	dI1
kcnc3a	9.28334e-11	-0.951178	0.172	0.524	2.16812e-06	dI1
hmgb3a	1.03828e-10	-0.800056	0.667	0.857	2.42489e-06	dI1
stx1b	1.3961e-10	-0.877786	0.713	0.85	3.2606e-06	dI1
sypb	1.78861e-10	-0.660855	0.126	0.474	4.17729e-06	dI1
ppiab	1.95927e-10	-0.777619	0.713	0.857	4.57588e-06	dI1
sypa	2.53287e-10	-0.705628	0.184	0.509	5.91551e-06	dI1
nkx1.2lb	2.45444e-168	1.44627	0.591	0.043	5.73234e-164	v2s
pax8	1.86078e-82	0.837663	0.54	0.076	4.34584e-78	v2s
irx1a	1.2842e-80	0.713857	0.438	0.05	2.99926e-76	v2s
mab21l2	2.00106e-63	1.91664	0.898	0.343	4.67348e-59	v2s
pax2a	1.17172e-56	0.904748	0.599	0.126	2.73654e-52	v2s
cacna2d3	1.62388e-45	0.566798	0.482	0.1	3.79257e-41	v2s
slc6a5	2.20246e-43	1.02898	0.818	0.294	5.14385e-39	v2s
tshz2	2.73809e-33	1.05188	0.62	0.232	6.3948e-29	v2s
zfhx3	8.12041e-30	1.03484	0.861	0.494	1.89652e-25	v2s
CR383676.1	1.13327e-28	0.636919	1	1	2.64676e-24	v2s
ptprda	8.1805e-28	0.790342	0.701	0.306	1.91056e-23	v2s
slc32a1	2.08189e-27	0.608658	0.854	0.35	4.86225e-23	v2s
slc30a2	5.69038e-24	0.567141	0.416	0.123	1.32899e-19	v2s
ppdpfb	6.04307e-24	1.22611	0.898	0.746	1.41136e-19	v2s
si:ch73-386h18.1	2.77114e-23	0.908989	0.796	0.52	6.472e-19	v2s
lhx1a	2.54631e-22	0.655925	0.737	0.347	5.94692e-18	v2s
lhx5	5.48834e-22	0.521719	0.599	0.241	1.2818e-17	v2s
nova2	2.5668e-17	0.565162	0.971	0.918	5.99475e-13	v2s
zfhx4	1.77006e-15	0.62898	0.745	0.42	4.13398e-11	v2s
eef1a1l1	1.99708e-14	-0.640599	0.825	0.914	4.66419e-10	v2s
tnrc6c1	7.17149e-14	0.64088	0.796	0.592	1.6749e-09	v2s
gap43	2.1489e-13	-0.841552	0.204	0.511	5.01875e-09	v2s
gapdhs	2.41129e-13	-1.02799	0.664	0.834	5.63157e-09	v2s
aplp1	2.42107e-13	-0.628625	0.358	0.644	5.6544e-09	v2s
stmn2a	2.48972e-13	-0.950588	0.358	0.611	5.81474e-09	v2s
sox11b	6.38469e-13	1.60103	0.518	0.305	1.49114e-08	v2s
srrm4	1.63334e-12	0.421849	0.365	0.151	3.81466e-08	v2s
hoxd3a	2.26431e-12	0.610332	0.818	0.634	5.28829e-08	v2s
zgc:194659	6.56136e-12	0.384822	0.336	0.137	1.53241e-07	v2s
fthl27	8.618e-12	0.627993	0.883	0.719	2.01273e-07	v2s
tubb4b	1.01976e-11	-0.616677	0.336	0.607	2.38164e-07	v2s
atp1a1a.1	1.29436e-11	-0.729792	0.307	0.592	3.02299e-07	v2s
atp1b2a	1.41304e-11	-0.732477	0.445	0.683	3.30015e-07	v2s
ywhag2	2.74489e-11	-0.683502	0.606	0.794	6.4107e-07	v2s
elavl3	3.42503e-11	0.451077	0.993	0.977	7.99916e-07	v2s
aldocb	5.03732e-11	-0.796166	0.489	0.688	1.17647e-06	v2s
nrn1a	6.11099e-11	-0.931884	0.124	0.391	1.42722e-06	v2s
actb2	1.23421e-10	-0.613188	0.62	0.826	2.8825e-06	v2s
camkvb	0	1.42175	0.687	0.038	0	v0c
chrna3	2.92066e-297	0.794159	0.469	0.013	6.82121e-293	v0c
ndnfl	3.87121e-243	1.27334	0.697	0.059	9.0412e-239	v0c
chgb	1.03861e-237	3.64578	0.972	0.171	2.42568e-233	v0c
PCP4	4.49015e-210	3.76941	0.943	0.185	1.04867e-205	v0c
si:dkey-215k6.1	6.09655e-206	1.04065	0.682	0.068	1.42385e-201	v0c
nxph3	1.28042e-203	1.06585	0.744	0.084	2.99043e-199	v0c
evx1	1.93714e-194	0.719019	0.483	0.031	4.52418e-190	v0c
evx2	5.31294e-180	0.725756	0.502	0.038	1.24084e-175	v0c
pcp4a	2.60403e-173	2.58141	0.943	0.224	6.08172e-169	v0c
il1rapl2	1.8865e-164	0.554107	0.365	0.019	4.40593e-160	v0c
oxr1b	4.08046e-138	1.01686	0.659	0.102	9.52991e-134	v0c
trarg1a	4.2129e-128	1.61048	0.948	0.305	9.83923e-124	v0c
sh3kbp1	2.56796e-125	0.676744	0.555	0.074	5.99746e-121	v0c
calb2b	2.40374e-124	1.82626	0.744	0.156	5.61394e-120	v0c
calm1b	9.978e-115	2.38756	0.995	0.627	2.33036e-110	v0c
gabra5	3.11863e-106	0.824801	0.602	0.106	7.28356e-102	v0c
XLOC-028064	1.42518e-105	1.40994	0.777	0.2	3.32851e-101	v0c
nrn1a	1.01458e-101	1.36821	0.976	0.358	2.36954e-97	v0c
uts2b	1.0495e-98	0.673827	0.308	0.026	2.4511e-94	v0c
slc17a6a	2.63886e-91	0.873827	0.758	0.185	6.16306e-87	v0c
thsd7ba	3.38589e-91	0.871163	0.611	0.127	7.90774e-87	v0c
atp2b4	3.63175e-91	1.58699	0.962	0.497	8.48196e-87	v0c
mctp1a	9.87753e-90	0.735388	0.417	0.058	2.3069e-85	v0c
stxbp1a	7.20572e-88	1.59004	0.986	0.689	1.6829e-83	v0c
calm1a	1.59344e-86	1.45606	1	0.896	3.72149e-82	v0c
si:dkey-178e17.1	3.57794e-86	0.482271	0.318	0.033	8.35629e-82	v0c
snap25a	3.66189e-86	1.34974	0.995	0.878	8.55234e-82	v0c
ndst3	1.80432e-83	0.519583	0.408	0.058	4.21399e-79	v0c
npffr1l2	2.42758e-83	0.45238	0.341	0.039	5.66962e-79	v0c
nrxn1a	9.17681e-82	1.14999	0.962	0.466	2.14324e-77	v0c
slc8a2b	8.27863e-80	0.842718	0.716	0.198	1.93347e-75	v0c
tmem121ab	6.12222e-79	0.446555	0.327	0.039	1.42984e-74	v0c
rgs6	1.04259e-78	0.38339	0.327	0.038	2.43496e-74	v0c
lrrtm1	1.1039e-78	1.00444	0.735	0.221	2.57816e-74	v0c
syt2a	1.14161e-74	1.31742	0.991	0.675	2.66623e-70	v0c
vsnl1b	1.46171e-73	1.2807	0.976	0.557	3.41383e-69	v0c
nxph1	2.86537e-73	0.514244	0.512	0.098	6.69206e-69	v0c
fibcd1	7.86838e-72	0.570342	0.464	0.088	1.83766e-67	v0c
gphna	5.28907e-71	0.704567	0.545	0.125	1.23526e-66	v0c
LOC101883723	5.8468e-71	0.711982	0.588	0.145	1.36552e-66	v0c
kcnd1	1.51919e-70	0.49025	0.389	0.061	3.54807e-66	v0c
atp1a1a.1	4.05252e-70	1.2393	0.948	0.569	9.46467e-66	v0c
olfm1a	1.31917e-68	0.940197	0.536	0.129	3.08091e-64	v0c
calm3a	1.03834e-67	1.21861	0.91	0.468	2.42503e-63	v0c
sox6	1.05988e-67	0.663069	0.46	0.091	2.47536e-63	v0c
mafba	7.68797e-67	0.529991	0.46	0.088	1.79553e-62	v0c
olfm1b	2.85768e-66	1.0412	0.938	0.506	6.67411e-62	v0c
chrna2b	1.43814e-65	0.408386	0.322	0.045	3.35877e-61	v0c
atp6v1e1b	1.67677e-65	1.05871	0.943	0.574	3.91611e-61	v0c
kirrel3l	2.88981e-65	0.565077	0.327	0.048	6.74915e-61	v0c
gpm6ab	7.94538e-65	1.1575	0.972	0.754	1.85564e-60	v0c
chata	1.07673e-64	0.854753	0.777	0.255	2.51471e-60	v0c
zeb2b	1.47147e-64	0.872432	0.322	0.048	3.43663e-60	v0c
slc17a6b	2.19488e-64	0.803904	0.782	0.252	5.12613e-60	v0c
rims4	2.46817e-64	0.547103	0.45	0.09	5.76441e-60	v0c
sulf2b	6.50209e-64	0.865761	0.72	0.234	1.51856e-59	v0c
slc18a3a	1.05179e-63	0.895099	0.763	0.255	2.45646e-59	v0c
zgc:65851	1.32923e-63	1.38425	0.716	0.249	3.10441e-59	v0c
ppp3r1a	3.81782e-62	1.07232	0.938	0.559	8.91652e-58	v0c
ppp3ccb	1.14817e-61	0.766518	0.64	0.197	2.68155e-57	v0c
caln1	2.05931e-61	0.502842	0.346	0.056	4.80951e-57	v0c
bsnb	5.29297e-61	1.0831	0.777	0.333	1.23617e-56	v0c
gpm6aa	1.48025e-58	0.952994	0.995	0.82	3.45711e-54	v0c
rbfox3a	2.09687e-58	1.07257	0.915	0.49	4.89724e-54	v0c
robo2	9.54436e-57	0.92864	0.919	0.482	2.22908e-52	v0c
zmat4a	1.24382e-56	0.443783	0.346	0.06	2.90493e-52	v0c
atpv0e2	2.33897e-55	0.790957	0.858	0.42	5.46266e-51	v0c
stat5a	2.38055e-55	0.436865	0.332	0.057	5.55977e-51	v0c
vamp1a	4.56302e-55	0.972743	0.896	0.468	1.06569e-50	v0c
si:dkey-7j14.5	4.91235e-55	0.977086	0.839	0.381	1.14728e-50	v0c
pcsk1nl	7.50916e-53	0.879099	0.806	0.357	1.75376e-48	v0c
aclya	2.09627e-52	0.527505	0.507	0.133	4.89584e-48	v0c
atp6v0cb	6.06657e-52	0.940941	0.995	0.746	1.41685e-47	v0c
bdnf	2.06094e-51	0.598622	0.526	0.139	4.81334e-47	v0c
syt2b	2.25505e-51	0.779574	0.844	0.361	5.26667e-47	v0c
gabrp	2.32147e-51	0.660684	0.555	0.171	5.4218e-47	v0c
stmn2a	4.39103e-51	1.07532	0.943	0.59	1.02552e-46	v0c
meis3	1.58679e-50	0.44853	0.365	0.073	3.70595e-46	v0c
CABZ01064248.1	8.52679e-50	0.483801	0.318	0.058	1.99143e-45	v0c
atp6v1h	2.96817e-49	0.667243	0.716	0.283	6.93217e-45	v0c
appb	1.11123e-48	0.781352	0.934	0.57	2.59529e-44	v0c
plxna2	2.72746e-48	0.939195	0.654	0.256	6.36997e-44	v0c
sema3aa	6.7059e-48	0.522645	0.351	0.072	1.56616e-43	v0c
sncgb	8.42765e-48	1.09046	0.972	0.802	1.96828e-43	v0c
nptna	1.48765e-47	0.801054	0.877	0.432	3.4744e-43	v0c
ywhag2	2.66919e-47	0.841291	0.981	0.781	6.23389e-43	v0c
akap6	1.04828e-46	0.553444	0.46	0.123	2.44825e-42	v0c
dtnbb	1.5623e-46	0.698632	0.63	0.232	3.64875e-42	v0c
rbms3	2.47577e-46	0.64518	0.588	0.195	5.78217e-42	v0c
ctnnd2a	2.63797e-46	0.587234	0.54	0.167	6.16097e-42	v0c
aplp1	8.53958e-46	0.815846	0.924	0.624	1.99442e-41	v0c
anos1a	2.78509e-45	0.559538	0.488	0.136	6.50457e-41	v0c
ache	7.39277e-45	0.603275	0.758	0.322	1.72658e-40	v0c
nectin1b	6.63552e-44	0.699066	0.654	0.251	1.54972e-39	v0c
LO018148.1	1.01453e-42	0.422443	0.336	0.073	2.36944e-38	v0c
zeb1b	1.09223e-42	0.515946	0.398	0.101	2.5509e-38	v0c
stx1b	1.8116e-42	0.850594	0.995	0.841	4.231e-38	v0c
sypa	1.1956e-41	0.749519	0.886	0.487	2.79232e-37	v0c
znf536	1.48303e-41	0.777364	0.597	0.221	3.46361e-37	v0c
spegb	2.12171e-41	0.493053	0.436	0.12	4.95526e-37	v0c
eno2	3.15308e-41	0.749463	0.915	0.601	7.36402e-37	v0c
dynll2b	4.80586e-41	0.576611	0.64	0.244	1.12241e-36	v0c
mab21l2	6.81569e-41	0.506871	0.81	0.339	1.5918e-36	v0c
sdk2b	7.85385e-41	0.395548	0.336	0.075	1.83427e-36	v0c
dnajc5aa	1.7463e-40	0.74393	0.9	0.6	4.07848e-36	v0c
epha4b	3.40059e-40	0.797027	0.886	0.502	7.94208e-36	v0c
vsnl1a	1.68807e-39	0.708017	0.697	0.306	3.94249e-35	v0c
GALNTL6	2.30207e-39	0.467945	0.398	0.105	5.37648e-35	v0c
abi2b	2.77911e-39	0.478496	0.46	0.138	6.49061e-35	v0c
cacna2d2b	6.8156e-39	0.437794	0.422	0.118	1.59178e-34	v0c
IGLON5	8.19357e-39	0.691769	0.82	0.437	1.91361e-34	v0c
mcu	8.82773e-39	0.415314	0.389	0.101	2.06172e-34	v0c
si:dkey-35i13.1	1.25333e-38	0.452474	0.507	0.16	2.92715e-34	v0c
si:ch211-214j24.9	1.66117e-38	0.701551	0.791	0.4	3.87967e-34	v0c
myt1b	2.09178e-38	0.814628	0.953	0.724	4.88534e-34	v0c
spon1a	3.82529e-38	0.656515	0.526	0.178	8.93397e-34	v0c
rnasekb	4.34719e-38	0.67895	0.915	0.622	1.01529e-33	v0c
sypb	5.01212e-38	0.68911	0.825	0.453	1.17058e-33	v0c
nav3	6.06099e-38	0.501636	0.483	0.153	1.41554e-33	v0c
nsfa	1.22923e-37	0.638419	0.801	0.411	2.87086e-33	v0c
sox11a	1.45394e-37	-1.49863	0.152	0.604	3.39567e-33	v0c
si:ch211-11n16.3	1.4784e-37	0.414792	0.355	0.089	3.4528e-33	v0c
atp6v0b	2.0989e-37	0.594492	0.72	0.324	4.90198e-33	v0c
XLOC-022188	2.29852e-37	0.520649	0.512	0.172	5.3682e-33	v0c
clstn1	2.5252e-37	0.697899	0.919	0.612	5.89761e-33	v0c
pcbp3	4.7465e-37	0.664192	0.592	0.228	1.10855e-32	v0c
nptnb	5.27298e-37	0.486793	0.654	0.252	1.23151e-32	v0c
sncb	5.64293e-37	0.802274	0.981	0.791	1.31791e-32	v0c
cplx2l	6.07875e-37	0.748855	0.905	0.532	1.41969e-32	v0c
calm2b	1.7789e-36	0.803815	0.976	0.844	4.15462e-32	v0c
calm3b	1.81672e-36	0.72939	0.896	0.631	4.24295e-32	v0c
gapdhs	7.29086e-36	0.751463	0.991	0.823	1.70278e-31	v0c
gnao1a	9.62743e-36	0.718654	0.848	0.566	2.24849e-31	v0c
clta	2.1561e-35	0.601091	0.806	0.415	5.03558e-31	v0c
lhx1a	7.72501e-35	0.565522	0.754	0.34	1.80418e-30	v0c
tagln3b	1.17784e-34	1.67936	0.445	0.148	2.75085e-30	v0c
CR383676.1	1.38312e-34	-0.804197	1	1	3.23028e-30	v0c
pik3r3b	2.4065e-34	-1.28426	0.251	0.649	5.62039e-30	v0c
BX247868.1	3.13446e-34	0.670767	0.564	0.226	7.32054e-30	v0c
tob1a	6.17287e-34	0.672278	0.953	0.69	1.44167e-29	v0c
map1aa	7.23921e-34	0.78085	0.844	0.524	1.69072e-29	v0c
edil3a	1.23451e-33	0.712057	0.768	0.378	2.8832e-29	v0c
hspa8	1.24857e-33	0.662793	0.981	0.92	2.91603e-29	v0c
nptx1l	1.52222e-33	0.451368	0.46	0.146	3.55515e-29	v0c
pacsin1a	1.77981e-33	0.688772	0.872	0.558	4.15674e-29	v0c
tubb2	1.86383e-33	0.628019	0.592	0.243	4.35296e-29	v0c
camk1da	2.57482e-33	0.507863	0.521	0.192	6.01348e-29	v0c
atp1b2a	2.42273e-32	0.663826	0.962	0.664	5.6583e-28	v0c
atp1b3b	6.31928e-32	0.693059	0.834	0.48	1.47587e-27	v0c
frmpd3	1.0122e-31	0.474214	0.46	0.16	2.36399e-27	v0c
tspan7b	1.0877e-31	0.567682	0.735	0.38	2.54032e-27	v0c
calb1	1.20897e-31	1.03159	0.379	0.122	2.82354e-27	v0c
vamp2	1.23447e-31	0.66731	0.962	0.768	2.88311e-27	v0c
dusp3a	2.28773e-31	0.462825	0.498	0.185	5.34299e-27	v0c
scn8aa	5.4002e-31	0.61865	0.777	0.448	1.26122e-26	v0c
luzp2	5.98935e-31	0.467839	0.583	0.235	1.39881e-26	v0c
rbfox1	8.00067e-31	0.635858	0.844	0.501	1.86856e-26	v0c
gnb1a	1.45492e-30	0.585183	0.938	0.7	3.39797e-26	v0c
si:ch211-114m9.1	1.73206e-30	0.566195	0.55	0.226	4.04524e-26	v0c
atp6ap2	1.89582e-30	0.542649	0.796	0.426	4.42768e-26	v0c
elavl4	2.65783e-30	0.671844	0.986	0.922	6.20736e-26	v0c
plxna1a	4.06916e-30	0.481026	0.46	0.161	9.50353e-26	v0c
arhgdig	4.92028e-30	0.545218	0.403	0.132	1.14913e-25	v0c
nat8l	4.98829e-30	0.605701	0.744	0.408	1.16502e-25	v0c
hist2h2l	1.06407e-29	0.726311	0.825	0.521	2.48513e-25	v0c
cacna1ab	1.29319e-29	0.597075	0.72	0.376	3.02024e-25	v0c
cplx1	1.91906e-29	0.672779	0.9	0.572	4.48197e-25	v0c
syn2a	2.00554e-29	0.590308	0.692	0.36	4.68395e-25	v0c
dynll2a	2.76067e-29	0.434422	0.493	0.187	6.44753e-25	v0c
NC-002333.17	6.5641e-29	-0.674982	1	1	1.53304e-24	v0c
atp6v1g1	7.80825e-29	0.63535	0.877	0.567	1.82362e-24	v0c
camk2g1	1.08488e-28	0.53203	0.673	0.336	2.53375e-24	v0c
tspan9a	1.18677e-28	0.442511	0.427	0.147	2.77169e-24	v0c
gnb1b	1.26784e-28	0.574422	0.934	0.726	2.96104e-24	v0c
nos1apb	1.83283e-28	0.504989	0.564	0.24	4.28057e-24	v0c
kiaa1549la	2.18091e-28	0.470634	0.564	0.237	5.09352e-24	v0c
bcl2b	3.39585e-28	0.445378	0.502	0.197	7.931e-24	v0c
sv2a	3.54393e-28	0.532126	0.896	0.581	8.27685e-24	v0c
calm2a	3.60427e-28	0.606862	0.957	0.79	8.41777e-24	v0c
fgf12a	4.74887e-28	0.434654	0.37	0.117	1.1091e-23	v0c
atp6v1aa	5.56332e-28	0.421535	0.555	0.233	1.29931e-23	v0c
pabpc1b	7.61036e-28	0.522584	0.621	0.286	1.7774e-23	v0c
gria2b	9.59091e-28	0.401913	0.398	0.131	2.23996e-23	v0c
crim1	1.52835e-27	0.492467	0.464	0.177	3.56947e-23	v0c
celf5a	2.27108e-27	0.405865	0.507	0.199	5.30412e-23	v0c
CABZ01029822.1	5.81489e-27	0.456387	0.573	0.249	1.35807e-22	v0c
sez6l2	6.52561e-27	0.545092	0.645	0.323	1.52406e-22	v0c
BX936308.1	8.29322e-27	0.462803	0.55	0.236	1.93688e-22	v0c
rab6bb	9.12129e-27	0.43657	0.649	0.304	2.13028e-22	v0c
kcnc3a	1.13101e-26	0.512525	0.844	0.504	2.64149e-22	v0c
kif1b	1.13897e-26	0.545008	0.801	0.491	2.66006e-22	v0c
gng7	1.57686e-26	0.464524	0.668	0.332	3.68276e-22	v0c
ywhaba	2.0145e-26	0.571494	0.877	0.618	4.70487e-22	v0c
CU914144.1	2.35623e-26	0.394095	0.374	0.122	5.50296e-22	v0c
amigo1	3.07495e-26	0.418776	0.46	0.176	7.18155e-22	v0c
kcna1a	3.18251e-26	0.524013	0.592	0.272	7.43275e-22	v0c
napgb	5.65092e-26	0.513667	0.711	0.387	1.31977e-21	v0c
grin1a	8.07528e-26	0.565653	0.692	0.361	1.88598e-21	v0c
scn1bb	8.34292e-26	0.395211	0.507	0.204	1.94849e-21	v0c
ip6k2b	1.0289e-25	0.517634	0.645	0.327	2.403e-21	v0c
si:dkey-151g10.6	1.11794e-25	-0.824607	0.986	0.991	2.61094e-21	v0c
pcdh7b	1.24077e-25	0.641954	0.701	0.384	2.89782e-21	v0c
atp6v0ca	4.94616e-25	0.538652	0.834	0.533	1.15518e-20	v0c
si:ch73-119p20.1	5.78504e-25	0.475599	0.763	0.415	1.3511e-20	v0c
zfhx3	6.67902e-25	0.494741	0.863	0.489	1.55989e-20	v0c
si:ch211-222l21.1	1.36741e-24	-0.883179	0.64	0.827	3.19358e-20	v0c
tmie	1.38258e-24	0.399576	0.564	0.254	3.22902e-20	v0c
cadpsb	1.49149e-24	0.549882	0.754	0.462	3.48338e-20	v0c
sh3gl2a	2.58225e-24	0.535793	0.825	0.497	6.03084e-20	v0c
sox4a	3.81554e-24	-1.28338	0.147	0.495	8.91119e-20	v0c
dock3	5.01158e-24	0.383225	0.436	0.17	1.17046e-19	v0c
napbb	7.74177e-24	0.394872	0.502	0.216	1.80809e-19	v0c
tuba1c	8.5917e-24	0.565193	0.962	0.821	2.00659e-19	v0c
nlgn2b	1.19357e-23	0.403058	0.545	0.244	2.78759e-19	v0c
NAV1 (1 of many)	1.36998e-23	0.380164	0.422	0.161	3.1996e-19	v0c
gng3	2.15937e-23	0.497778	0.9	0.674	5.0432e-19	v0c
si:dkeyp-77h1.4	2.35489e-23	0.423194	0.573	0.26	5.49985e-19	v0c
dab1a	2.64712e-23	0.415559	0.564	0.26	6.18235e-19	v0c
nanos1	4.0138e-23	-1.02118	0.265	0.573	9.37423e-19	v0c
ywhaqa	5.37607e-23	0.443006	0.725	0.404	1.25558e-18	v0c
ppiab	5.50915e-23	0.557859	0.953	0.85	1.28666e-18	v0c
ank1b	7.55792e-23	0.441	0.578	0.274	1.76515e-18	v0c
rplp1	8.86137e-23	-0.927719	0.777	0.896	2.06957e-18	v0c
ncanb	2.48712e-22	0.394562	0.408	0.154	5.80868e-18	v0c
ckmt1	4.09615e-22	0.461247	0.668	0.351	9.56656e-18	v0c
glra1	4.30299e-22	0.457137	0.682	0.357	1.00496e-17	v0c
npas4a	4.88292e-22	0.595848	0.654	0.347	1.14041e-17	v0c
stau2	6.93335e-22	0.434477	0.583	0.294	1.61928e-17	v0c
tox	9.18452e-22	0.557336	0.754	0.473	2.14505e-17	v0c
rusc1	1.15312e-21	0.498349	0.697	0.409	2.69311e-17	v0c
syn1	1.20196e-21	0.394528	0.46	0.197	2.80718e-17	v0c
rps20	1.40184e-21	-0.795836	0.758	0.849	3.27399e-17	v0c
fam131bb	1.59665e-21	0.450284	0.564	0.279	3.72898e-17	v0c
adam23a	2.07032e-21	0.445122	0.654	0.363	4.83523e-17	v0c
rps12	2.59962e-21	-0.809444	0.725	0.849	6.07141e-17	v0c
gjd1a	3.59699e-21	0.470577	0.72	0.413	8.40078e-17	v0c
cd81a	4.06685e-21	0.399556	0.796	0.481	9.49812e-17	v0c
bin1a	7.4407e-21	0.395602	0.616	0.319	1.73778e-16	v0c
si:dkeyp-75h12.5	8.00496e-21	0.468734	0.806	0.522	1.86956e-16	v0c
apbb2b	1.72085e-20	0.403893	0.498	0.233	4.01904e-16	v0c
marcksl1a	1.72306e-20	-0.771497	0.341	0.62	4.02421e-16	v0c
cdc42	3.52674e-20	0.380209	0.673	0.379	8.23671e-16	v0c
atp2b3a	4.29402e-20	0.410048	0.82	0.506	1.00287e-15	v0c
NC-002333.4	5.21257e-20	-0.495864	1	1	1.2174e-15	v0c
FO082781.1	5.47087e-20	-0.694993	0.081	0.392	1.27772e-15	v0c
tenm3	5.50858e-20	0.451099	0.46	0.204	1.28653e-15	v0c
slc32a1	6.38699e-20	-1.07914	0.071	0.376	1.49168e-15	v0c
tmem59l	9.08841e-20	0.415304	0.782	0.487	2.1226e-15	v0c
rtn1b	1.30233e-19	0.408053	0.882	0.612	3.04159e-15	v0c
napba	2.19026e-19	0.422376	0.569	0.295	5.11536e-15	v0c
tmsb4x	2.79571e-19	0.429342	0.981	0.962	6.52937e-15	v0c
cbx1b	3.49785e-19	0.385233	0.73	0.415	8.16923e-15	v0c
cpe	5.77602e-19	0.438686	0.839	0.563	1.34899e-14	v0c
ctnnb1	9.21771e-19	0.447465	0.422	0.192	2.1528e-14	v0c
rpl36a	1.02238e-18	-0.674025	0.863	0.918	2.38777e-14	v0c
cirbpb	1.25149e-18	-0.536418	0.882	0.932	2.92284e-14	v0c
pcdh9	1.48852e-18	-0.574221	0.066	0.362	3.47644e-14	v0c
apbb1	1.51008e-18	0.389482	0.597	0.326	3.52679e-14	v0c
zgc:100920	1.82367e-18	0.432175	0.659	0.382	4.25918e-14	v0c
nrxn3a	2.3495e-18	-0.641402	0.047	0.335	5.48726e-14	v0c
nfil3-5	2.36985e-18	-0.654244	0.147	0.44	5.5348e-14	v0c
mapk10	6.25019e-18	0.43109	0.706	0.441	1.45973e-13	v0c
rps9	1.02186e-17	-0.66816	0.602	0.77	2.38656e-13	v0c
rpl23	1.48721e-17	-0.70955	0.73	0.856	3.47338e-13	v0c
rpl30	1.49578e-17	-0.661216	0.73	0.832	3.49338e-13	v0c
rps14	1.6018e-17	-0.653855	0.815	0.868	3.74099e-13	v0c
LOC100537384	2.14558e-17	-0.812659	0.242	0.512	5.011e-13	v0c
islr2	4.41847e-17	-0.730708	0.057	0.333	1.03193e-12	v0c
h2afx1	4.90337e-17	0.532944	0.943	0.843	1.14518e-12	v0c
cplx2	4.97963e-17	0.44119	0.668	0.397	1.16299e-12	v0c
esrrga	5.06014e-17	-0.843648	0.076	0.354	1.1818e-12	v0c
pcdh11	6.17173e-17	-0.696237	0.066	0.337	1.44141e-12	v0c
pclob	8.54275e-17	0.416717	0.711	0.435	1.99516e-12	v0c
gpx4b	1.08763e-16	0.409837	0.592	0.338	2.54016e-12	v0c
faua	1.76771e-16	-0.62583	0.825	0.891	4.1285e-12	v0c
rps27.1	2.7504e-16	-0.636224	0.81	0.875	6.42356e-12	v0c
rps23	3.26321e-16	-0.646462	0.787	0.878	7.62122e-12	v0c
rpl17	3.59308e-16	-0.610412	0.801	0.868	8.39164e-12	v0c
naca	3.60213e-16	-0.59841	0.711	0.809	8.41277e-12	v0c
rps21	4.49617e-16	-0.584595	0.872	0.918	1.05008e-11	v0c
ddit3	5.25867e-16	-0.831077	0.246	0.505	1.22816e-11	v0c
cbx7a	6.54259e-16	-0.840788	0.199	0.461	1.52802e-11	v0c
tmsb	3.20337e-15	-0.655227	0.161	0.418	7.48146e-11	v0c
bsg	3.58659e-15	0.403121	0.872	0.65	8.37647e-11	v0c
ckbb	5.89941e-15	0.456185	0.905	0.775	1.37781e-10	v0c
elavl3	6.36545e-15	-0.481267	0.972	0.978	1.48665e-10	v0c
myt1la	7.51852e-15	-0.433284	0.057	0.304	1.75595e-10	v0c
rpl39	8.30066e-15	-0.618256	0.844	0.926	1.93862e-10	v0c
CABZ01072614.1	1.4984e-14	-0.666687	0.986	0.995	3.49952e-10	v0c
h3f3d	2.12509e-14	-0.487027	0.948	0.949	4.96316e-10	v0c
zgc:65894	2.25496e-14	0.387134	0.806	0.577	5.26646e-10	v0c
jun	2.3322e-14	-1.06409	0.479	0.683	5.44685e-10	v0c
nfasca	2.49389e-14	0.767705	0.464	0.245	5.82449e-10	v0c
rps27a	2.69617e-14	-0.514311	0.825	0.886	6.2969e-10	v0c
rpl34	3.87265e-14	-0.549662	0.701	0.793	9.04458e-10	v0c
rps29	4.29112e-14	-0.488631	0.938	0.953	1.00219e-09	v0c
rps25	4.6483e-14	-0.509238	0.877	0.912	1.08561e-09	v0c
rpl27	8.9078e-14	-0.540436	0.649	0.781	2.08042e-09	v0c
rplp2l	9.60259e-14	-0.654498	0.611	0.754	2.24269e-09	v0c
foxp4	1.08664e-13	-0.952515	0.076	0.309	2.53785e-09	v0c
rpl32	1.28175e-13	-0.569486	0.853	0.892	2.99353e-09	v0c
tubb2b	1.45953e-13	0.42123	0.972	0.859	3.40874e-09	v0c
marcksl1b	1.7339e-13	-0.474967	0.967	0.969	4.04952e-09	v0c
slit3	1.76908e-13	-0.650233	0.109	0.346	4.13168e-09	v0c
rpl37	4.80291e-13	-0.580836	0.886	0.928	1.12172e-08	v0c
rps24	8.68485e-13	-0.517615	0.806	0.876	2.02835e-08	v0c
rpl14	9.2037e-13	-0.531945	0.791	0.853	2.14952e-08	v0c
atp1b1b	1.19673e-12	-1.26516	0.133	0.354	2.79496e-08	v0c
rps15a	2.19028e-12	-0.579601	0.801	0.871	5.11539e-08	v0c
rps5	3.29205e-12	-0.535798	0.725	0.802	7.68858e-08	v0c
CABZ01045617.1	6.55243e-12	-0.480782	0.607	0.745	1.53032e-07	v0c
rps15	7.53027e-12	-0.493007	0.82	0.878	1.7587e-07	v0c
rpl35	1.1753e-11	-0.511772	0.829	0.864	2.74491e-07	v0c
rpl10a	1.29962e-11	-0.507877	0.621	0.762	3.03525e-07	v0c
rpl18	1.42412e-11	-0.501752	0.763	0.83	3.32603e-07	v0c
rpl26	1.53161e-11	-0.516682	0.744	0.82	3.57707e-07	v0c
rpl38	2.44893e-11	-0.499778	0.882	0.895	5.71948e-07	v0c
nr2f1a	4.34191e-11	-0.632804	0.171	0.378	1.01405e-06	v0c
pnrc2	4.07719e-10	-0.488834	0.73	0.825	9.52228e-06	v0c
nr5a2	6.2499e-226	1.28886	0.665	0.053	1.45966e-221	v0v
pvalb7	1.82967e-223	1.34764	0.41	0.015	4.27319e-219	v0v
rgs4	1.43156e-215	1.74832	0.505	0.03	3.3434e-211	v0v
c1ql4a	2.48774e-169	0.723573	0.355	0.016	5.81012e-165	v0v
nxph3	1.12646e-162	1.08499	0.69	0.087	2.63085e-158	v0v
si:dkey-215k6.1	5.47948e-146	0.828232	0.61	0.072	1.27973e-141	v0v
slc17a6b	6.67727e-101	1.26726	0.88	0.249	1.55948e-96	v0v
syt1a	5.57311e-95	1.48898	0.945	0.425	1.3016e-90	v0v
evx2	1.20777e-94	0.464766	0.39	0.043	2.82075e-90	v0v
trhra	2.6097e-92	0.671107	0.43	0.056	6.09494e-88	v0v
ndnf	3.38856e-91	0.731128	0.415	0.053	7.91399e-87	v0v
gjd2b	2.11548e-90	0.425562	0.32	0.03	4.9407e-86	v0v
gapdhs	1.09352e-84	1.58443	1	0.823	2.55391e-80	v0v
sncb	4.71357e-84	1.52738	0.995	0.791	1.10086e-79	v0v
tmsb2	4.83535e-77	1.01338	0.8	0.255	1.1293e-72	v0v
eno1a	1.4493e-76	1.35551	0.94	0.485	3.38485e-72	v0v
sulf2b	2.81593e-75	1.22023	0.745	0.234	6.5766e-71	v0v
nrxn1a	7.54786e-73	1.20933	0.94	0.469	1.7628e-68	v0v
pcdh17	1.11037e-72	1.12166	0.795	0.263	2.59326e-68	v0v
ckmt1	1.25131e-71	1.04525	0.89	0.343	2.92243e-67	v0v
unc5db	1.39377e-71	0.463404	0.345	0.046	3.25516e-67	v0v
si:dkeyp-77h1.4	2.15603e-70	0.996459	0.77	0.252	5.0354e-66	v0v
rgs16	2.50573e-70	0.62574	0.42	0.07	5.85212e-66	v0v
klf7a	2.09563e-69	0.672274	0.595	0.143	4.89434e-65	v0v
ldha	5.25674e-66	1.09993	0.82	0.333	1.22771e-61	v0v
snap25b	7.46278e-66	1.31081	0.945	0.56	1.74293e-61	v0v
vamp2	2.93474e-64	1.03586	0.99	0.767	6.85408e-60	v0v
cdh24b	1.22661e-63	0.629606	0.54	0.125	2.86474e-59	v0v
gpia	2.62632e-63	0.882213	0.77	0.28	6.13378e-59	v0v
ndufa4	1.84503e-61	0.993674	0.875	0.383	4.30908e-57	v0v
slc17a6a	2.92586e-61	0.829039	0.66	0.191	6.83334e-57	v0v
atp6v0cb	7.88984e-60	1.0766	0.98	0.748	1.84267e-55	v0v
cntnap3	4.97417e-59	0.494918	0.34	0.054	1.16172e-54	v0v
cdh4	2.29512e-58	0.619085	0.62	0.172	5.36025e-54	v0v
sypb	6.70062e-56	0.962702	0.895	0.451	1.56493e-51	v0v
aldocb	6.88289e-56	1.08396	0.975	0.671	1.6075e-51	v0v
mab21l1	3.18439e-55	0.661924	0.56	0.147	7.43714e-51	v0v
clta	1.60764e-53	0.900635	0.84	0.415	3.75465e-49	v0v
si:ch73-119p20.1	3.28747e-53	0.844726	0.87	0.411	7.67788e-49	v0v
atp1a3a	4.96424e-52	1.05026	0.95	0.573	1.1594e-47	v0v
slc2a3a	7.40395e-52	1.01357	0.815	0.35	1.72919e-47	v0v
atp6v1e1b	7.59651e-52	0.926507	0.96	0.574	1.77416e-47	v0v
drd2b	6.83986e-51	0.540747	0.31	0.052	1.59745e-46	v0v
cycsb	8.12183e-51	0.972595	0.96	0.584	1.89685e-46	v0v
zfhx3	9.74696e-51	0.946737	0.945	0.486	2.2764e-46	v0v
mab21l2	2.22802e-50	1.00509	0.825	0.339	5.20354e-46	v0v
atp6v1g1	3.68947e-50	0.903647	0.94	0.565	8.61677e-46	v0v
apln	8.59689e-50	0.482625	0.405	0.088	2.0078e-45	v0v
cntnap5b	2.32292e-49	0.539498	0.435	0.101	5.42517e-45	v0v
fam131ba	2.74836e-49	0.558746	0.505	0.136	6.41881e-45	v0v
LOC108179567	4.96285e-48	0.591435	0.505	0.141	1.15907e-43	v0v
aldoaa	6.0787e-47	0.900987	0.9	0.53	1.41968e-42	v0v
ca2	1.11599e-46	0.817482	0.615	0.206	2.60639e-42	v0v
scxa	1.22145e-46	0.463536	0.355	0.071	2.85269e-42	v0v
uqcrh	1.05774e-45	0.745318	0.74	0.316	2.47036e-41	v0v
b3glcta	1.71611e-44	0.39246	0.315	0.06	4.00798e-40	v0v
gphna	2.33126e-43	0.460183	0.475	0.129	5.44467e-39	v0v
atp5f1b	2.51434e-43	0.803916	0.945	0.623	5.87223e-39	v0v
calb1	2.51121e-42	0.620939	0.455	0.119	5.86494e-38	v0v
cox4i1	8.59726e-42	0.811012	0.93	0.598	2.00789e-37	v0v
cadm2a	8.1701e-41	0.819756	0.635	0.253	1.90813e-36	v0v
epha4b	8.77801e-41	0.879468	0.89	0.502	2.0501e-36	v0v
ckbb	6.45967e-40	0.874344	0.99	0.772	1.50866e-35	v0v
atp5pd	7.47042e-40	0.739159	0.705	0.321	1.74472e-35	v0v
sypa	2.22379e-39	0.801985	0.855	0.489	5.19367e-35	v0v
cox6a1	2.69316e-39	0.746537	0.9	0.538	6.28986e-35	v0v
atp5mc3b	4.50768e-39	0.842072	0.935	0.644	1.05277e-34	v0v
tpi1b	8.64753e-39	0.752165	0.905	0.55	2.01963e-34	v0v
nrn1a	1.23564e-38	0.777898	0.825	0.365	2.88583e-34	v0v
inab	3.74999e-38	0.651995	0.63	0.237	8.7581e-34	v0v
pfkla	1.07497e-37	0.41306	0.415	0.113	2.51059e-33	v0v
stmn2a	1.28025e-37	0.808643	0.95	0.59	2.99003e-33	v0v
sv2a	3.39066e-37	0.856822	0.9	0.581	7.91888e-33	v0v
strbp	3.53133e-37	0.762575	0.68	0.309	8.24742e-33	v0v
sfxn3	3.86113e-37	0.388651	0.345	0.082	9.01768e-33	v0v
slc6a17	3.89385e-37	0.590968	0.8	0.369	9.09408e-33	v0v
synj1	4.37104e-37	0.413453	0.43	0.121	1.02086e-32	v0v
atp5mc1	4.66434e-37	0.780184	0.85	0.468	1.08936e-32	v0v
atp6ap2	1.35622e-36	0.673036	0.81	0.427	3.16745e-32	v0v
ywhag2	1.50589e-36	0.698589	0.995	0.781	3.517e-32	v0v
si:ch211-106h4.9	3.04803e-36	0.442102	0.335	0.08	7.11868e-32	v0v
slc7a8a	3.17023e-36	0.545145	0.595	0.222	7.40407e-32	v0v
oxr1a	4.57333e-36	0.463177	0.49	0.156	1.0681e-31	v0v
nptnb	4.6659e-36	0.590218	0.63	0.254	1.08972e-31	v0v
pkma	1.83233e-35	0.670734	0.765	0.369	4.2794e-31	v0v
atp6v1h	2.71295e-35	0.514551	0.685	0.285	6.3361e-31	v0v
rtn1b	2.84782e-35	0.712496	0.925	0.611	6.65109e-31	v0v
ldhba	4.18439e-35	0.593336	0.78	0.375	9.77265e-31	v0v
cox6b1	4.40235e-35	0.574279	0.55	0.198	1.02817e-30	v0v
si:ch211-214j24.9	1.02449e-34	0.627837	0.795	0.4	2.39269e-30	v0v
cplx1	1.51639e-34	0.856424	0.93	0.572	3.54153e-30	v0v
vdac1	3.2857e-33	0.62187	0.83	0.502	7.67376e-29	v0v
nnt	4.73345e-33	0.384103	0.44	0.135	1.1055e-28	v0v
tob1a	5.94332e-33	0.938124	0.92	0.692	1.38806e-28	v0v
slc25a3b	6.82329e-33	0.661213	0.87	0.515	1.59358e-28	v0v
COX5B	1.09707e-32	0.729146	0.91	0.598	2.56221e-28	v0v
scamp5a	1.23952e-32	0.582566	0.615	0.261	2.8949e-28	v0v
acsbg2	6.05463e-32	0.55349	0.585	0.238	1.41406e-27	v0v
rnasekb	7.02179e-32	0.654542	0.935	0.622	1.63994e-27	v0v
mllt11	7.14899e-32	0.507612	0.655	0.281	1.66965e-27	v0v
map7d2b	1.0196e-31	0.511474	0.58	0.232	2.38129e-27	v0v
syn1	1.69723e-31	0.4706	0.53	0.195	3.96387e-27	v0v
atp5fa1	2.13111e-31	0.664381	0.855	0.548	4.9772e-27	v0v
si:dkeyp-123h10.2	2.41708e-31	0.541155	0.525	0.197	5.64509e-27	v0v
cox7c	3.37255e-31	0.727519	0.89	0.615	7.87658e-27	v0v
nsfa	4.35424e-31	0.563775	0.805	0.412	1.01693e-26	v0v
cox8a	4.73406e-31	0.70494	0.915	0.615	1.10564e-26	v0v
atp5pf	5.20745e-31	0.643424	0.765	0.402	1.2162e-26	v0v
atp5meb	7.57089e-31	0.647223	0.755	0.404	1.76818e-26	v0v
atpv0e2	1.06074e-30	0.589932	0.785	0.424	2.47736e-26	v0v
XLOC-023304	2.20504e-30	0.385274	0.33	0.088	5.14988e-26	v0v
mpc1	2.85574e-30	0.550487	0.66	0.306	6.66959e-26	v0v
pygmb	6.76123e-30	0.6327	0.735	0.378	1.57909e-25	v0v
zgc:193541	7.11935e-30	0.615311	0.845	0.523	1.66272e-25	v0v
atp5l	7.30047e-30	0.638971	0.88	0.57	1.70503e-25	v0v
ndufs2	7.79412e-30	0.411399	0.505	0.184	1.82032e-25	v0v
LOC100334937	1.39965e-29	0.417513	0.465	0.16	3.26888e-25	v0v
edil3a	3.20227e-29	0.648198	0.74	0.38	7.4789e-25	v0v
tuba1c	3.23792e-29	0.698006	0.985	0.82	7.56216e-25	v0v
atp6v0ca	4.04866e-29	0.654804	0.855	0.533	9.45565e-25	v0v
sdhb	4.47467e-29	0.529497	0.675	0.327	1.04506e-24	v0v
uqcrq	5.05701e-29	0.528034	0.68	0.326	1.18106e-24	v0v
uqcrc1	6.79303e-29	0.482657	0.64	0.288	1.58651e-24	v0v
zgc:65894	8.20261e-29	0.690405	0.885	0.575	1.91572e-24	v0v
npas4a	9.38067e-29	0.636036	0.715	0.345	2.19086e-24	v0v
ap2m1a	9.97471e-29	0.546775	0.735	0.393	2.32959e-24	v0v
adcyap1r1b	1.3749e-28	0.439676	0.39	0.124	3.21108e-24	v0v
cox6c	1.80691e-28	0.654575	0.79	0.503	4.22003e-24	v0v
CR383676.1	1.97069e-28	-0.750512	1	1	4.60254e-24	v0v
atp1b2a	2.11308e-28	0.69907	0.93	0.666	4.9351e-24	v0v
mpped2a	2.32419e-28	0.396717	0.365	0.111	5.42815e-24	v0v
got2b	2.51039e-28	0.429805	0.51	0.197	5.86303e-24	v0v
tjp1a	2.88514e-28	0.547094	0.5	0.198	6.73825e-24	v0v
pik3r3b	3.51206e-28	-1.19344	0.29	0.647	8.20241e-24	v0v
pgk1	7.30876e-28	0.565933	0.645	0.311	1.70696e-23	v0v
pip4k2ab	1.18968e-27	0.502096	0.565	0.237	2.7785e-23	v0v
ndufb9	1.23495e-27	0.493489	0.625	0.287	2.88422e-23	v0v
slc25a5	3.71767e-27	0.523456	1	0.949	8.68261e-23	v0v
atp6v1d	4.73502e-27	0.488424	0.53	0.223	1.10586e-22	v0v
atp6v1c1a	5.15662e-27	0.388612	0.485	0.182	1.20433e-22	v0v
rab6bb	7.27398e-27	0.498299	0.65	0.305	1.69884e-22	v0v
pcbp3	7.32582e-27	0.433156	0.565	0.23	1.71095e-22	v0v
pgam1a	1.89135e-26	0.47081	0.515	0.208	4.41726e-22	v0v
CABZ01039304.1	4.86276e-26	0.483068	0.425	0.153	1.1357e-21	v0v
clstn1	4.87487e-26	0.645165	0.87	0.614	1.13853e-21	v0v
map1aa	7.08217e-26	0.640438	0.825	0.526	1.65404e-21	v0v
gap43	1.03049e-25	0.799787	0.795	0.49	2.40671e-21	v0v
rab3ab	2.03866e-25	0.506451	0.775	0.441	4.76129e-21	v0v
dynll2b	2.14527e-25	0.439654	0.565	0.248	5.01028e-21	v0v
aco2	2.20515e-25	0.409605	0.46	0.176	5.15013e-21	v0v
gdi1	2.20811e-25	0.521525	0.675	0.347	5.15703e-21	v0v
ndrg3a	2.58805e-25	0.595276	0.67	0.367	6.04439e-21	v0v
zfhx4	5.21888e-25	0.514594	0.785	0.414	1.21887e-20	v0v
XLOC-040108	5.64919e-25	0.526891	0.625	0.305	1.31937e-20	v0v
hk1	5.68382e-25	0.475285	0.61	0.283	1.32746e-20	v0v
atp2b3b	6.64667e-25	0.547762	0.705	0.385	1.55233e-20	v0v
vdac2	8.02518e-25	0.575223	0.825	0.521	1.87428e-20	v0v
vdac3	1.15214e-24	0.530395	0.85	0.562	2.69083e-20	v0v
calm3a	4.62547e-24	0.509111	0.805	0.473	1.08028e-19	v0v
tmsb4x	6.1942e-24	0.585638	0.99	0.962	1.44666e-19	v0v
cox5aa	7.38085e-24	0.502935	0.795	0.464	1.7238e-19	v0v
arhgdig	9.13545e-24	0.406156	0.385	0.133	2.13358e-19	v0v
zgc:153426	1.00822e-23	0.562101	0.735	0.406	2.3547e-19	v0v
pacsin1a	1.23291e-23	0.531791	0.86	0.559	2.87946e-19	v0v
CU467961.1	1.40182e-23	0.449816	0.445	0.178	3.27395e-19	v0v
prkag2a	1.73113e-23	0.410894	0.385	0.136	4.04306e-19	v0v
atp5mc3a	2.45315e-23	0.523102	0.645	0.348	5.72934e-19	v0v
ndufa2	2.48466e-23	0.403654	0.5	0.212	5.80293e-19	v0v
atp6ap1a	2.90112e-23	0.421053	0.605	0.286	6.77558e-19	v0v
cadpsb	3.17007e-23	0.57028	0.765	0.462	7.4037e-19	v0v
atp6v0d1	3.27683e-23	0.436914	0.52	0.231	7.65303e-19	v0v
ndufb8	3.43901e-23	0.479114	0.695	0.383	8.03181e-19	v0v
syn2a	3.57432e-23	0.474089	0.695	0.361	8.34783e-19	v0v
napgb	3.88427e-23	0.508069	0.705	0.388	9.07172e-19	v0v
cyc1	3.97788e-23	0.428747	0.575	0.27	9.29034e-19	v0v
XLOC-028064	4.5882e-23	0.465339	0.515	0.212	1.07158e-18	v0v
sox4a	8.84221e-23	-1.32128	0.16	0.494	2.0651e-18	v0v
atp6v0a1b	1.56186e-22	0.507917	0.745	0.438	3.64772e-18	v0v
atp5if1b	1.78575e-22	0.528732	0.765	0.484	4.17061e-18	v0v
pgam1b	1.89152e-22	0.398976	0.41	0.156	4.41765e-18	v0v
atp6v1b2	2.54321e-22	0.393764	0.575	0.267	5.93966e-18	v0v
cox5ab	3.40516e-22	0.447756	0.615	0.306	7.95275e-18	v0v
ndfip1	3.4979e-22	0.389443	0.525	0.233	8.16934e-18	v0v
grin1b	3.97024e-22	0.403925	0.54	0.239	9.27251e-18	v0v
glrbb	3.98602e-22	0.404983	0.59	0.283	9.30934e-18	v0v
serinc1	4.14622e-22	0.573234	0.825	0.595	9.68349e-18	v0v
dacha	9.78562e-22	0.423169	0.505	0.216	2.28543e-17	v0v
snap25a	1.18297e-21	0.528251	0.965	0.88	2.76283e-17	v0v
bsg	1.5159e-21	0.488194	0.89	0.649	3.54038e-17	v0v
si:ch1073-325m22.2	1.91703e-21	0.479445	0.66	0.356	4.47722e-17	v0v
ndufab1b	2.2576e-21	0.424263	0.495	0.217	5.27263e-17	v0v
rrad	2.6754e-21	0.7466	0.545	0.269	6.24841e-17	v0v
nanos1	3.33563e-21	-0.999277	0.275	0.572	7.79036e-17	v0v
stxbp5a	4.50795e-21	0.449126	0.495	0.225	1.05283e-16	v0v
gnao1a	4.66705e-21	0.451679	0.83	0.567	1.08999e-16	v0v
cox7a2a	9.10098e-21	0.536004	0.755	0.465	2.12553e-16	v0v
kif1aa	9.80802e-21	0.539312	0.785	0.544	2.29066e-16	v0v
ppiab	1.45895e-20	0.490868	0.985	0.849	3.40738e-16	v0v
atp6v0b	1.75551e-20	0.49294	0.615	0.33	4.09999e-16	v0v
atp5f1d	1.96923e-20	0.440175	0.67	0.369	4.59912e-16	v0v
atp2b4	2.51385e-20	0.505528	0.8	0.505	5.87109e-16	v0v
slc25a22a	2.56969e-20	0.495667	0.535	0.259	6.00152e-16	v0v
cdc42	2.80435e-20	0.411769	0.685	0.38	6.54957e-16	v0v
atp5f1e	3.17273e-20	0.475533	0.86	0.584	7.4099e-16	v0v
robo2	3.44122e-20	0.569515	0.765	0.489	8.03697e-16	v0v
ywhaba	4.20312e-20	0.489194	0.83	0.62	9.81638e-16	v0v
syngr3a	8.60172e-20	0.473698	0.645	0.373	2.00893e-15	v0v
stxbp1a	8.63287e-20	0.443036	0.935	0.691	2.01621e-15	v0v
tnc	9.45245e-20	0.401508	0.3	0.099	2.20762e-15	v0v
slc38a2	1.19757e-19	0.562338	0.81	0.585	2.79693e-15	v0v
cox7b	1.57757e-19	0.502381	0.825	0.563	3.68442e-15	v0v
atp5po	2.29804e-19	0.409015	0.68	0.381	5.36707e-15	v0v
ap2s1	4.42304e-19	0.403242	0.475	0.218	1.033e-14	v0v
atp2b2	5.23229e-19	0.563212	0.65	0.377	1.222e-14	v0v
elovl6	1.25819e-18	0.39088	0.49	0.231	2.93851e-14	v0v
mdh2	2.3114e-18	0.433836	0.54	0.275	5.39827e-14	v0v
ndufb7	3.16562e-18	0.391872	0.535	0.27	7.39331e-14	v0v
uqcrb	3.93946e-18	0.439974	0.56	0.289	9.20061e-14	v0v
ndufa5	4.0485e-18	0.383663	0.61	0.322	9.45528e-14	v0v
mdh1aa	4.11063e-18	0.422568	0.665	0.379	9.60038e-14	v0v
nrxn3a	4.43232e-18	-0.636199	0.04	0.335	1.03517e-13	v0v
pafah1b1b	4.88089e-18	0.39406	0.615	0.332	1.13993e-13	v0v
cplx2	5.10462e-18	0.459269	0.675	0.397	1.19218e-13	v0v
plxna3	6.43658e-18	0.45395	0.605	0.344	1.50326e-13	v0v
uqcr10	1.3074e-17	0.416257	0.625	0.353	3.05343e-13	v0v
clstn3	1.51728e-17	0.394468	0.595	0.316	3.5436e-13	v0v
mt-atp6	1.73952e-17	0.419078	0.99	0.961	4.06264e-13	v0v
necap1	1.87188e-17	0.395883	0.625	0.352	4.37178e-13	v0v
gng3	1.93219e-17	0.485097	0.88	0.675	4.51263e-13	v0v
si:dkeyp-75h12.5	2.25004e-17	0.469083	0.745	0.526	5.25496e-13	v0v
ndrg4	3.4682e-17	0.475036	0.7	0.444	8.09997e-13	v0v
cpe	3.53423e-17	0.432017	0.83	0.564	8.25418e-13	v0v
atp5md	3.53432e-17	0.425586	0.615	0.355	8.25441e-13	v0v
atp5mf	3.54425e-17	0.458226	0.77	0.515	8.27759e-13	v0v
dynll1	5.38498e-17	0.460226	0.69	0.429	1.25766e-12	v0v
ywhabl	6.11454e-17	0.444102	0.815	0.613	1.42805e-12	v0v
rusc1	6.6332e-17	0.39587	0.685	0.41	1.54918e-12	v0v
islr2	7.46356e-17	-0.764805	0.055	0.332	1.74312e-12	v0v
slit3	7.79929e-17	-0.726406	0.065	0.347	1.82152e-12	v0v
atp2b3a	1.08675e-16	0.443126	0.775	0.509	2.5381e-12	v0v
tubb5	1.33309e-16	0.451737	0.575	0.317	3.11343e-12	v0v
syt4	2.25014e-16	0.428976	0.66	0.406	5.2552e-12	v0v
atp5pb	3.62226e-16	0.380027	0.63	0.353	8.45978e-12	v0v
sox11a	1.03352e-15	-1.05044	0.36	0.594	2.41378e-11	v0v
kif1b	1.14686e-15	0.391504	0.735	0.495	2.67849e-11	v0v
cfl1	2.03406e-15	0.383214	0.975	0.881	4.75055e-11	v0v
si:dkey-151g10.6	2.03952e-15	-0.674033	0.995	0.991	4.76331e-11	v0v
ube2ql1	2.63776e-15	0.413983	0.86	0.62	6.16049e-11	v0v
gnb1a	3.48333e-15	0.400652	0.9	0.702	8.13532e-11	v0v
slc32a1	4.1287e-15	-1.02412	0.12	0.374	9.64259e-11	v0v
kif1ab	8.52881e-15	0.401677	0.705	0.471	1.9919e-10	v0v
nfil3-5	9.99917e-15	-0.610479	0.18	0.438	2.33531e-10	v0v
syt7a	1.38815e-14	0.382756	0.5	0.262	3.24202e-10	v0v
pcdh7a	2.28729e-14	-0.550274	0.155	0.419	5.34196e-10	v0v
hoxb8a	2.81782e-14	-0.620068	0.11	0.369	6.58103e-10	v0v
atp1b1b	4.04061e-14	0.475715	0.595	0.334	9.43686e-10	v0v
rps27a	4.82385e-14	-0.516074	0.81	0.887	1.12661e-09	v0v
l1cama	4.91694e-14	0.419528	0.575	0.344	1.14835e-09	v0v
rbfox1	8.00602e-14	-0.615176	0.285	0.525	1.86981e-09	v0v
zgc:65851	8.33319e-14	0.444149	0.49	0.26	1.94622e-09	v0v
hmgn7	8.39102e-14	0.384011	0.87	0.707	1.95972e-09	v0v
FO082781.1	9.54269e-14	-0.620907	0.145	0.389	2.2287e-09	v0v
ek1	1.06728e-13	0.460453	0.415	0.207	2.49263e-09	v0v
irf2bpl	1.07241e-13	0.391609	0.69	0.473	2.50462e-09	v0v
idh2	1.17056e-13	0.385876	0.74	0.485	2.73384e-09	v0v
gnb1b	1.26437e-13	0.424004	0.905	0.727	2.95293e-09	v0v
elavl4	1.48843e-13	0.458342	0.995	0.922	3.47623e-09	v0v
aplp2	2.25796e-13	0.385184	0.605	0.364	5.27347e-09	v0v
NC-002333.17	2.35587e-13	-0.463894	1	1	5.50215e-09	v0v
rps20	2.52492e-13	-0.647622	0.745	0.85	5.89695e-09	v0v
ncam1a	2.78226e-13	0.399391	0.625	0.398	6.49797e-09	v0v
rplp1	2.97402e-13	-0.757816	0.835	0.893	6.94581e-09	v0v
slc6a5	3.78099e-13	-1.46768	0.085	0.317	8.83049e-09	v0v
ndrg2	4.49082e-13	0.38482	0.71	0.486	1.04883e-08	v0v
fosaa	4.61807e-13	0.521417	0.69	0.461	1.07855e-08	v0v
gpm6aa	5.58173e-13	0.437047	0.95	0.822	1.30361e-08	v0v
rtn1a	1.19655e-12	0.446429	0.91	0.82	2.79455e-08	v0v
rps25	1.21663e-12	-0.483809	0.88	0.912	2.84144e-08	v0v
gpm6ab	1.38949e-12	0.400038	0.915	0.757	3.24516e-08	v0v
pcdh11	1.80463e-12	-0.622323	0.105	0.335	4.2147e-08	v0v
rpl32	4.21821e-12	-0.563515	0.855	0.892	9.85162e-08	v0v
foxp4	5.86371e-12	-0.937543	0.09	0.308	1.36947e-07	v0v
rps27.1	6.6195e-12	-0.548139	0.82	0.875	1.54598e-07	v0v
CABZ01045617.1	2.0251e-11	-0.485229	0.625	0.744	4.72961e-07	v0v
tubb4b	2.14402e-11	0.405857	0.785	0.592	5.00737e-07	v0v
h3f3d	5.6488e-11	-0.440159	0.945	0.95	1.31928e-06	v0v
ptprda	7.07183e-11	-0.500965	0.115	0.325	1.65162e-06	v0v
rps21	7.17204e-11	-0.490085	0.885	0.917	1.67503e-06	v0v
naca	1.84405e-10	-0.467343	0.695	0.81	4.30679e-06	v0v
hoxd10a	1.92521e-10	0.40288	0.56	0.359	4.49632e-06	v0v
rps14	2.7244e-10	-0.519769	0.81	0.868	6.36284e-06	v0v
GFP	0	3.36467	0.928	0.044	0	RB
scn1laa	0	2.09763	0.732	0.02	0	RB
entpd3	0	1.81417	0.634	0.004	0	RB
cckb	0	1.79761	0.603	0.013	0	RB
p2rx3a	0	1.61026	0.706	0.003	0	RB
htr3a	0	0.968998	0.49	0.003	0	RB
kitb	0	0.808483	0.423	0.005	0	RB
trarg1b	0	0.69145	0.402	0.002	0	RB
CU179656.1	1.40911e-272	1.13097	0.515	0.02	3.29098e-268	RB
prkcaa	8.16912e-210	1.21474	0.567	0.04	1.9079e-205	RB
akap12b	2.38485e-159	1.24931	0.753	0.113	5.56983e-155	RB
pmp22b	2.5476e-154	0.517864	0.32	0.014	5.94993e-150	RB
CABZ01072077.1	1.51912e-152	1.37797	0.521	0.048	3.54791e-148	RB
col4a5	1.68511e-151	1.15365	0.608	0.07	3.93557e-147	RB
itpr3	1.07911e-148	0.439885	0.314	0.014	2.52026e-144	RB
col4a6	5.59894e-144	1.11128	0.603	0.073	1.30763e-139	RB
sprn2	1.38527e-139	0.73624	0.387	0.027	3.2353e-135	RB
tp53i11a	5.51638e-138	0.651178	0.428	0.034	1.28835e-133	RB
hbegfa	4.75035e-135	1.50371	0.665	0.102	1.10944e-130	RB
tlx2	4.38882e-127	0.527765	0.32	0.019	1.02501e-122	RB
lgi2b	6.65211e-125	0.633274	0.366	0.027	1.5536e-120	RB
atp1b4	8.38007e-123	1.31245	0.675	0.114	1.95717e-118	RB
plecb	6.00297e-122	1.21206	0.649	0.105	1.40199e-117	RB
stm	8.43214e-118	1.71203	0.773	0.175	1.96933e-113	RB
sncga	2.71093e-115	0.930201	0.521	0.067	6.33138e-111	RB
kcnab2a	3.76521e-112	2.04832	0.794	0.197	8.79364e-108	RB
cacnb3b	2.54275e-106	0.676228	0.387	0.038	5.9386e-102	RB
pbxip1b	5.57714e-104	0.892378	0.526	0.076	1.30254e-99	RB
ptn	7.17165e-102	1.13341	0.577	0.098	1.67494e-97	RB
cx43	6.79726e-100	0.72184	0.469	0.061	1.5875e-95	RB
slc4a4a	1.23685e-98	1.27987	0.639	0.127	2.88866e-94	RB
ctgfa	1.66758e-98	0.811258	0.505	0.073	3.89464e-94	RB
mdka	1.71349e-98	1.30226	0.711	0.165	4.00185e-94	RB
wnt4b	7.68035e-96	1.2637	0.649	0.136	1.79374e-91	RB
thbs1b	3.19083e-95	0.725315	0.428	0.053	7.45219e-91	RB
atp1a1b	1.87064e-94	1.2653	0.742	0.189	4.36888e-90	RB
lurap1	2.09939e-94	0.570479	0.371	0.039	4.90313e-90	RB
nptx1l	6.10477e-93	1.15177	0.66	0.14	1.42577e-88	RB
zgc:165461	1.94083e-92	1.04584	0.552	0.096	4.53282e-88	RB
si:dkey-245n4.2	1.9856e-92	0.49153	0.32	0.029	4.63737e-88	RB
tppp2	2.09759e-91	1.20868	0.83	0.244	4.89892e-87	RB
mag	1.33765e-90	1.28237	0.649	0.143	3.12408e-86	RB
flna	4.666e-88	0.578724	0.387	0.046	1.08974e-83	RB
atp1b1a	3.13655e-87	1.35253	0.722	0.194	7.3254e-83	RB
hmga2	4.97721e-87	0.711361	0.49	0.077	1.16243e-82	RB
slc6a11b	3.54081e-86	0.588505	0.402	0.051	8.26956e-82	RB
clstn2	1.11808e-84	1.04724	0.763	0.208	2.61127e-80	RB
krt18a.1	2.00814e-83	1.03744	0.515	0.092	4.69002e-79	RB
sdc4	6.17617e-83	1.17256	0.701	0.172	1.44245e-78	RB
plscr3b	6.7967e-83	0.841795	0.495	0.085	1.58737e-78	RB
cav1	2.69307e-82	0.832011	0.51	0.091	6.28967e-78	RB
il11a	7.28227e-82	0.75721	0.464	0.073	1.70078e-77	RB
cd81a	1.39391e-81	1.51784	0.902	0.478	3.25548e-77	RB
hpca	1.10486e-80	1.58964	0.784	0.267	2.58041e-76	RB
cavin1b	3.73796e-80	0.673038	0.443	0.068	8.73e-76	RB
zfp36l1b	2.15474e-78	0.944346	0.572	0.122	5.0324e-74	RB
slc6a9	1.14536e-77	1.05609	0.629	0.151	2.67498e-73	RB
zgc:153704	2.37185e-77	1.23883	0.696	0.195	5.53945e-73	RB
lmna	3.14321e-77	0.484074	0.32	0.035	7.34097e-73	RB
rgs6	1.60082e-76	0.525429	0.33	0.039	3.73871e-72	RB
pleca	1.88577e-76	0.845911	0.629	0.147	4.40421e-72	RB
endouc	1.03151e-75	0.754795	0.459	0.077	2.40909e-71	RB
zgc:113531	1.75638e-75	0.521834	0.376	0.051	4.10202e-71	RB
anxa13l	2.18271e-75	1.29735	0.588	0.142	5.09771e-71	RB
tpm4a	2.87051e-74	0.633978	0.428	0.068	6.70408e-70	RB
igfbp7	2.65812e-73	0.744883	0.469	0.083	6.20804e-69	RB
gpm6bb	3.50477e-72	0.639263	0.423	0.068	8.18539e-68	RB
eml2	1.75219e-71	0.695238	0.428	0.072	4.09224e-67	RB
fosl1a	7.4545e-71	0.955135	0.686	0.188	1.741e-66	RB
cldn7a	1.6232e-68	0.93194	0.536	0.118	3.79099e-64	RB
fabp7a	5.13967e-65	1.56914	0.851	0.447	1.20037e-60	RB
pth1a	3.20173e-64	1.12724	0.701	0.226	7.47764e-60	RB
tuft1a	5.91453e-64	0.533496	0.397	0.067	1.38134e-59	RB
slc3a2a	2.06979e-63	0.655476	0.376	0.061	4.83399e-59	RB
cldn19	7.1627e-63	0.994244	0.598	0.164	1.67285e-58	RB
flot1b	1.32016e-62	0.384947	0.309	0.041	3.08323e-58	RB
XLOC-008935	1.81007e-62	0.938371	0.546	0.135	4.22743e-58	RB
gfap	1.89904e-62	1.6067	0.866	0.488	4.43521e-58	RB
lgi2a	5.81559e-61	0.693169	0.381	0.066	1.35823e-56	RB
si:ch211-251b21.1	1.13408e-60	0.779806	0.428	0.083	2.64864e-56	RB
ptmab	1.61231e-60	-1.16766	0.938	0.991	3.76555e-56	RB
plp2	1.73162e-60	0.554611	0.412	0.076	4.04421e-56	RB
uchl1	1.43616e-59	0.856581	0.448	0.095	3.35415e-55	RB
si:ch73-265d7.2	2.08118e-59	1.11191	0.768	0.307	4.8606e-55	RB
capn1b	2.1893e-59	0.631799	0.361	0.061	5.11312e-55	RB
CABZ01072614.1	2.66509e-59	1.04538	1	0.994	6.22433e-55	RB
wnt7aa	7.72408e-59	0.436912	0.325	0.048	1.80396e-54	RB
slc1a2b	1.06318e-58	1.21414	0.758	0.312	2.48305e-54	RB
SEMA4F	3.25729e-58	0.505277	0.335	0.052	7.60741e-54	RB
krt8	4.22869e-57	0.548833	0.345	0.057	9.87611e-53	RB
ptmaa	7.58088e-57	-1.18881	0.912	0.991	1.77051e-52	RB
sparc	2.48643e-55	0.427336	0.314	0.047	5.80706e-51	RB
si:ch211-156j16.1	1.79649e-54	0.911263	0.598	0.178	4.19571e-50	RB
ptgdsb.2	3.49564e-52	0.558991	0.392	0.078	8.16408e-48	RB
cldnk	3.60473e-52	0.854901	0.541	0.149	8.41884e-48	RB
qki2	4.15955e-52	0.772866	0.593	0.18	9.71462e-48	RB
si:ch1073-303k11.2	5.00178e-52	0.430546	0.33	0.055	1.16817e-47	RB
cd82a	1.03638e-51	0.683813	0.418	0.09	2.42047e-47	RB
neflb	3.83172e-50	0.985347	0.552	0.156	8.94897e-46	RB
s1pr1	5.00151e-50	0.412367	0.309	0.051	1.1681e-45	RB
cnn3a	9.46624e-50	0.565564	0.433	0.097	2.21084e-45	RB
timp2b	1.71951e-48	0.56939	0.361	0.072	4.01591e-44	RB
slc7a10a	7.17981e-48	0.591491	0.381	0.08	1.67684e-43	RB
ppp3cca	1.23885e-46	0.574449	0.376	0.082	2.89334e-42	RB
ank2a	2.31127e-46	1.04627	0.613	0.222	5.39796e-42	RB
amigo3	2.57417e-46	0.546587	0.428	0.102	6.01197e-42	RB
adam11	8.29357e-45	0.906632	0.485	0.14	1.93696e-40	RB
vim	4.93608e-43	0.877516	0.742	0.335	1.15282e-38	RB
rgcc	8.42748e-42	0.744003	0.454	0.127	1.96824e-37	RB
h3f3d	2.65854e-41	-0.953216	0.794	0.956	6.20902e-37	RB
CR383676.1	2.29326e-40	-0.833818	1	1	5.35591e-36	RB
si:ch211-153f2.7	1.05302e-39	0.572225	0.572	0.191	2.45934e-35	RB
atf3	1.29142e-39	0.852105	0.887	0.524	3.01612e-35	RB
prph	2.49776e-39	0.67151	0.469	0.138	5.83352e-35	RB
alcamb	4.64684e-38	0.677978	0.546	0.174	1.08527e-33	RB
sox2	2.10248e-37	0.485196	0.34	0.079	4.91034e-33	RB
mpz	3.6571e-37	0.584526	0.32	0.071	8.54116e-33	RB
ptgdsb.1	8.19458e-37	0.467353	0.376	0.095	1.91384e-32	RB
slc7a5	8.49441e-37	0.529933	0.387	0.102	1.98387e-32	RB
kctd5a	2.19692e-36	0.786067	0.495	0.17	5.13092e-32	RB
trarg1a	3.33174e-36	0.880316	0.711	0.316	7.78128e-32	RB
h3f3a	9.3997e-36	-0.849157	0.655	0.902	2.1953e-31	RB
NC-002333.17	1.17664e-34	0.729775	1	1	2.74804e-30	RB
actb2	4.66886e-34	0.801321	0.948	0.815	1.09041e-29	RB
nova2	8.01528e-34	-0.840477	0.686	0.929	1.87197e-29	RB
cd59	2.09981e-33	0.608476	0.381	0.107	4.9041e-29	RB
slc44a1b	4.08099e-33	0.484364	0.407	0.12	9.53116e-29	RB
cnn2	6.10329e-33	0.449779	0.33	0.083	1.42542e-28	RB
ndrg3a	7.11697e-33	0.750292	0.706	0.366	1.66217e-28	RB
spegb	1.15635e-32	0.494445	0.412	0.122	2.70065e-28	RB
ptprfb	1.78034e-32	0.530568	0.567	0.218	4.15799e-28	RB
tuba8l3	2.37836e-30	0.504191	0.397	0.122	5.55466e-26	RB
msna	3.5406e-30	0.487931	0.392	0.119	8.26906e-26	RB
NC-002333.4	6.3678e-30	0.528406	1	1	1.4872e-25	RB
ywhah	1.35625e-28	-0.759023	0.541	0.822	3.16752e-24	RB
h3f3c	3.97185e-28	-0.701003	0.593	0.861	9.27626e-24	RB
camk2g1	4.49551e-28	1.05718	0.665	0.337	1.04993e-23	RB
hapln1a	1.06733e-26	0.469329	0.407	0.138	2.49276e-22	RB
tpm1	1.36324e-26	0.380795	0.412	0.138	3.18384e-22	RB
socs3a	1.53231e-26	0.596103	0.392	0.133	3.57872e-22	RB
si:ch73-335l21.4	2.63664e-26	0.40832	0.325	0.093	6.15787e-22	RB
XLOC-043834	3.11086e-26	0.627915	0.985	0.958	7.26542e-22	RB
XLOC-003690	1.74759e-25	0.445624	0.345	0.107	4.0815e-21	RB
scn8ab	1.89521e-25	0.877334	0.624	0.316	4.42627e-21	RB
marcksl1b	3.44943e-25	-0.737874	0.892	0.972	8.05613e-21	RB
si:ch211-196l7.4	6.89547e-25	-0.757458	0.598	0.81	1.61044e-20	RB
txn	7.26861e-25	0.473085	0.423	0.15	1.69758e-20	RB
hmgb1b	1.6619e-24	-0.703594	0.546	0.816	3.88137e-20	RB
si:ch211-195b15.8	1.99142e-24	-0.876173	0.32	0.661	4.65097e-20	RB
nova1	5.92014e-24	-0.805241	0.392	0.702	1.38265e-19	RB
phf24	1.86653e-23	0.47239	0.351	0.117	4.35929e-19	RB
reep5	2.6107e-23	0.426819	0.376	0.133	6.0973e-19	RB
sgk1	5.79141e-23	0.42882	0.345	0.115	1.35258e-18	RB
scn2b	7.23638e-23	0.451559	0.448	0.18	1.69006e-18	RB
si:ch73-1a9.3	1.03097e-22	-0.731883	0.845	0.937	2.40782e-18	RB
h2afx1	1.67506e-22	-0.852859	0.675	0.854	3.9121e-18	RB
cirbpb	1.50501e-21	-0.632047	0.825	0.934	3.51496e-17	RB
zgc:158463	1.83037e-21	0.470162	1	1	4.27483e-17	RB
CT583728.24	1.94748e-21	0.544044	0.521	0.248	4.54835e-17	RB
sncb	2.44085e-21	-1.06814	0.608	0.807	5.7006e-17	RB
cacna1aa	4.14749e-21	-0.581859	0.211	0.554	9.68647e-17	RB
map1ab	1.65695e-20	0.759731	0.634	0.35	3.86981e-16	RB
ankrd12	2.02087e-20	-0.606488	0.335	0.646	4.71974e-16	RB
fgf13a	2.39882e-20	0.511056	0.448	0.197	5.60245e-16	RB
ntrk2a	3.11161e-20	0.678376	0.34	0.127	7.26716e-16	RB
calm1b	7.87177e-20	0.514476	0.887	0.633	1.83845e-15	RB
epb41a	9.34585e-20	-0.569619	0.258	0.585	2.18272e-15	RB
arl6ip5b	1.13246e-19	0.382939	0.325	0.115	2.64487e-15	RB
rsrp1	1.39749e-19	-0.735362	0.464	0.719	3.26384e-15	RB
cebpd	8.94178e-19	0.401894	0.392	0.157	2.08835e-14	RB
CR383676.2	1.9695e-18	0.505971	0.644	0.364	4.59977e-14	RB
pcbp4	2.99357e-18	0.48139	0.397	0.17	6.99149e-14	RB
myt1b	6.82998e-18	-0.70631	0.505	0.742	1.59514e-13	RB
adcyap1b	6.84953e-18	0.414946	0.696	0.404	1.59971e-13	RB
nat16	7.99237e-18	-0.600052	0.247	0.552	1.86662e-13	RB
slc4a10a	1.09501e-17	0.495297	0.567	0.306	2.55739e-13	RB
hoxd3a	1.14498e-17	-0.695902	0.402	0.649	2.67409e-13	RB
atp6v0cb	1.16779e-17	-0.904279	0.634	0.762	2.72737e-13	RB
kcnma1a	3.04903e-17	-0.507786	0.201	0.513	7.12101e-13	RB
glula	4.08082e-17	0.479872	0.407	0.181	9.53076e-13	RB
alcama	4.87456e-17	0.526687	0.536	0.266	1.13845e-12	RB
gpr85	5.78898e-17	-0.461284	0.082	0.384	1.35202e-12	RB
flot2b	6.26653e-17	0.49011	0.438	0.212	1.46355e-12	RB
tnrc6c1	7.47939e-17	-0.563088	0.314	0.609	1.74681e-12	RB
CABZ01045617.1	8.24445e-17	0.479572	0.871	0.734	1.92549e-12	RB
hnrnpa0l	9.55971e-17	-0.582673	0.644	0.809	2.23267e-12	RB
nptxrb	1.04527e-16	0.394194	0.335	0.133	2.44123e-12	RB
ywhag1	1.16604e-16	0.634705	0.706	0.473	2.72328e-12	RB
stmn2a	2.50722e-16	0.539423	0.861	0.594	5.85561e-12	RB
gria2a	2.9826e-16	-0.472087	0.067	0.349	6.96586e-12	RB
dclk1b	4.1394e-16	0.434671	0.433	0.206	9.66757e-12	RB
prnprs3	5.28697e-16	0.446601	0.443	0.216	1.23477e-11	RB
cdk5r2a	8.01552e-16	-0.529448	0.165	0.45	1.87203e-11	RB
ppfia3	1.17916e-15	-0.487813	0.32	0.584	2.75393e-11	RB
map1b	1.21224e-15	0.416454	0.531	0.276	2.83119e-11	RB
kcna1a	2.24983e-15	0.660667	0.515	0.276	5.25448e-11	RB
si:ch211-222l21.1	2.91907e-15	-0.684556	0.649	0.826	6.81749e-11	RB
egr4	3.32371e-15	-0.928563	0.263	0.527	7.76252e-11	RB
LOC100537384	4.38015e-15	-0.735781	0.247	0.511	1.02299e-10	RB
wu:fb55g09	6.80509e-15	-0.59305	0.304	0.562	1.58933e-10	RB
scn4ba	6.95664e-15	0.472483	0.412	0.188	1.62472e-10	RB
sptbn1	7.90541e-15	0.47846	0.49	0.272	1.84631e-10	RB
gjd1a	7.97442e-15	-0.536742	0.165	0.436	1.86242e-10	RB
hnrnpa0b	1.1134e-14	-0.508164	0.402	0.649	2.60034e-10	RB
h2afvb	2.29462e-14	-0.450786	0.294	0.547	5.35907e-10	RB
hist2h2l	2.77634e-14	-0.698148	0.309	0.543	6.48414e-10	RB
her15.1	2.82464e-14	0.529225	0.433	0.215	6.59695e-10	RB
lrrc4bb	2.97197e-14	-0.411017	0.103	0.372	6.94103e-10	RB
cadm3	3.07536e-14	0.617532	0.716	0.547	7.1825e-10	RB
her4.2	3.42121e-14	0.405884	0.304	0.124	7.99023e-10	RB
sh3gl2a	4.0275e-14	-0.574525	0.268	0.52	9.40623e-10	RB
actb1	5.13403e-14	0.437531	0.809	0.621	1.19905e-09	RB
tox	5.62981e-14	-0.519553	0.232	0.495	1.31484e-09	RB
hmgn2	6.51194e-14	-0.640172	0.505	0.727	1.52086e-09	RB
dedd1	7.31244e-14	-0.485444	0.412	0.652	1.70782e-09	RB
hmgb3a	8.5876e-14	-0.657836	0.758	0.857	2.00563e-09	RB
kdm6bb	9.35663e-14	-0.49302	0.247	0.509	2.18524e-09	RB
ptprda	9.39388e-14	-0.558044	0.077	0.326	2.19394e-09	RB
tubb5	1.04983e-13	0.381734	0.557	0.318	2.45188e-09	RB
syt2a	1.58898e-13	-0.857837	0.531	0.694	3.71106e-09	RB
CABZ01080702.1	1.71437e-13	0.483342	0.644	0.441	4.00392e-09	RB
nrxn2a	2.5363e-13	-0.453667	0.16	0.416	5.92354e-09	RB
znf704	2.58102e-13	-0.650469	0.361	0.571	6.02796e-09	RB
si:ch73-386h18.1	3.19505e-13	-0.671442	0.314	0.536	7.46205e-09	RB
adam23a	3.42156e-13	0.726262	0.577	0.367	7.99105e-09	RB
prelid3b	3.67604e-13	-0.493679	0.32	0.573	8.58538e-09	RB
spock3	4.9451e-13	0.451695	0.485	0.269	1.15493e-08	RB
si:ch211-26b3.4	7.92802e-13	-0.398906	0.139	0.392	1.85159e-08	RB
grin1a	8.82072e-13	-0.563628	0.144	0.384	2.06008e-08	RB
elavl3	9.4273e-13	-0.480251	0.928	0.979	2.20175e-08	RB
rplp0	1.05206e-12	-0.514185	0.799	0.89	2.45709e-08	RB
gpm6aa	1.1152e-12	-0.567885	0.675	0.834	2.60454e-08	RB
cdh2	1.17089e-12	0.426988	0.515	0.307	2.73462e-08	RB
oaz1b	1.40544e-12	-0.430756	0.459	0.685	3.28241e-08	RB
sncgb	1.41189e-12	-1.12303	0.778	0.81	3.29748e-08	RB
tob1a	1.63499e-12	-0.6994	0.531	0.708	3.81852e-08	RB
atf7ip	1.73477e-12	-0.541547	0.407	0.615	4.05156e-08	RB
nrxn3a	2.11322e-12	-0.562658	0.098	0.332	4.93543e-08	RB
rab6bb	2.12127e-12	0.410151	0.521	0.311	4.95423e-08	RB
ncam1a	2.492e-12	-0.408065	0.165	0.417	5.82006e-08	RB
dnajc5aa	2.49372e-12	-0.47972	0.412	0.62	5.82409e-08	RB
nfasca	2.54155e-12	0.395067	0.448	0.246	5.93578e-08	RB
ptprga	2.61493e-12	-0.578286	0.206	0.438	6.10716e-08	RB
ube2ql1	3.49443e-12	-0.572174	0.454	0.636	8.16123e-08	RB
pacsin1a	4.44932e-12	-0.524323	0.361	0.579	1.03914e-07	RB
ier2b	4.48636e-12	-0.587712	0.232	0.457	1.04779e-07	RB
hmga1a	5.20957e-12	0.451374	0.732	0.572	1.21669e-07	RB
syn2a	5.54319e-12	-0.435631	0.149	0.383	1.29461e-07	RB
hsp70.2	6.72491e-12	-1.85909	0.665	0.704	1.5706e-07	RB
rnasekb	1.16438e-11	-0.511805	0.443	0.642	2.7194e-07	RB
cnbpb	1.75415e-11	-0.397263	0.691	0.837	4.09681e-07	RB
ube2e3	1.89158e-11	-0.413748	0.361	0.587	4.41778e-07	RB
mdkb	2.2983e-11	0.562723	0.711	0.553	5.36768e-07	RB
eif4ebp1	2.32419e-11	-0.434624	0.18	0.407	5.42816e-07	RB
scn1ba	2.7616e-11	0.39214	0.418	0.228	6.44971e-07	RB
zc4h2	2.8958e-11	-0.40091	0.222	0.457	6.76313e-07	RB
atp1a3a	2.92815e-11	-0.696153	0.423	0.594	6.83869e-07	RB
vdac1	3.05355e-11	-0.435775	0.304	0.523	7.13157e-07	RB
slc38a2	3.08797e-11	-0.477577	0.412	0.601	7.21196e-07	RB
vamp2	3.46552e-11	-0.565776	0.665	0.781	8.09373e-07	RB
spen	3.7583e-11	-0.41709	0.304	0.54	8.77751e-07	RB
fosaa	5.23171e-11	-0.568531	0.268	0.478	1.22187e-06	RB
cpe	5.36334e-11	-0.54443	0.387	0.582	1.25261e-06	RB
nanos1	5.5384e-11	-0.755298	0.387	0.567	1.29349e-06	RB
prr12b	8.01302e-11	-0.39294	0.232	0.458	1.87144e-06	RB
btg1	1.07219e-10	-0.470744	0.644	0.77	2.50409e-06	RB
camk2n1a	1.0998e-10	-0.609544	0.284	0.477	2.56859e-06	RB
gabrb4	1.14584e-10	-0.399469	0.227	0.456	2.6761e-06	RB
baz2ba	1.32206e-10	-0.439569	0.376	0.593	3.08768e-06	RB
dnajb1b	1.6746e-10	-1.66234	0.361	0.516	3.91104e-06	RB
pbx3b	2.42418e-10	-0.671796	0.335	0.521	5.66168e-06	RB
cdk5r1b	2.66283e-10	-0.392256	0.222	0.447	6.21904e-06	RB
si:ch211-137a8.4	3.81671e-10	-0.38926	0.186	0.4	8.91392e-06	RB
vsx2	0	2.25542	0.854	0.037	0	v2a
shox2	0	2.17231	0.649	0.032	0	v2a
sp8b	3.2821e-286	0.951909	0.481	0.023	7.66534e-282	v2a
sox14	3.54225e-278	0.920436	0.484	0.024	8.27293e-274	v2a
lhx4	8.87667e-118	0.837168	0.604	0.127	2.07315e-113	v2a
robo2	1.47855e-110	1.22121	0.937	0.471	3.45315e-106	v2a
ntng1a	6.12036e-106	0.609022	0.389	0.055	1.42941e-101	v2a
ptprk	9.52122e-101	0.607455	0.437	0.075	2.22368e-96	v2a
nrn1a	6.10175e-94	1.02234	0.908	0.348	1.42506e-89	v2a
strbp	1.79165e-90	1.01014	0.759	0.295	4.18441e-86	v2a
nr5a2	1.49644e-85	0.889376	0.358	0.058	3.49495e-81	v2a
ndnf	2.82804e-85	0.800079	0.329	0.05	6.60488e-81	v2a
pcdh17	1.0318e-81	1.0213	0.696	0.257	2.40977e-77	v2a
slc17a6b	2.18241e-80	0.770565	0.734	0.243	5.09703e-76	v2a
islr2	1.54237e-70	1.01555	0.722	0.294	3.6022e-66	v2a
zfhx4	2.29675e-70	0.959271	0.842	0.401	5.36406e-66	v2a
hif1aa	4.69287e-70	0.39239	0.32	0.055	1.09602e-65	v2a
bhlhe22	6.65389e-61	1.34233	0.43	0.122	1.55402e-56	v2a
gapdhs	2.63939e-53	1.11306	0.972	0.82	6.16429e-49	v2a
ptprda	3.06595e-50	0.712316	0.665	0.293	7.16052e-46	v2a
cdh4	1.77161e-49	0.493987	0.5	0.169	4.13759e-45	v2a
ank1b	5.03524e-47	0.58799	0.614	0.265	1.17598e-42	v2a
hs6st1a	6.2628e-47	0.526939	0.427	0.138	1.46268e-42	v2a
anos1a	4.47899e-46	0.52009	0.421	0.132	1.04607e-41	v2a
slc17a6a	1.62327e-45	0.53759	0.522	0.188	3.79115e-41	v2a
glrbb	1.7775e-43	0.618152	0.598	0.275	4.15134e-39	v2a
kiaa1549la	2.95192e-43	0.539978	0.551	0.23	6.89421e-39	v2a
stx1b	9.92083e-43	0.660316	0.975	0.839	2.31701e-38	v2a
tspan18a	5.19581e-41	0.443746	0.32	0.089	1.21348e-36	v2a
ckmt1	3.7667e-40	0.605365	0.684	0.343	8.79712e-36	v2a
raly	2.46005e-39	0.434878	0.316	0.089	5.74545e-35	v2a
rbfox3b	5.47075e-39	0.547995	0.449	0.17	1.27769e-34	v2a
atp2b4	6.37669e-39	0.623268	0.82	0.496	1.48928e-34	v2a
calm3a	3.38308e-38	0.637174	0.785	0.466	7.90119e-34	v2a
pip4k2ab	6.78663e-38	0.543605	0.532	0.231	1.58502e-33	v2a
epha4b	1.00424e-37	0.587982	0.832	0.497	2.3454e-33	v2a
zfhx3	3.89007e-37	0.808186	0.788	0.485	9.08525e-33	v2a
ldha	3.75813e-36	0.695491	0.633	0.333	8.77711e-32	v2a
meis2a	1.91219e-35	0.482198	0.639	0.319	4.46592e-31	v2a
nell2b	2.24843e-35	0.564497	0.57	0.262	5.2512e-31	v2a
nptna	3.00497e-35	0.649747	0.747	0.43	7.01811e-31	v2a
ndufa4	2.12191e-34	0.614305	0.715	0.382	4.95572e-30	v2a
atp6v1e1b	1.90074e-33	0.592026	0.845	0.572	4.43917e-29	v2a
cplx1	2.25033e-33	0.630112	0.864	0.567	5.25564e-29	v2a
sncb	4.63085e-33	0.798469	0.943	0.79	1.08153e-28	v2a
nptnb	1.0139e-32	0.423724	0.547	0.251	2.36797e-28	v2a
atp2b3a	7.14394e-32	0.483356	0.832	0.498	1.66847e-27	v2a
eno1a	8.02871e-32	0.935873	0.741	0.487	1.8751e-27	v2a
brinp1	9.14185e-32	0.401946	0.519	0.229	2.13508e-27	v2a
snap25b	4.34978e-31	0.768606	0.81	0.559	1.01589e-26	v2a
nectin1b	5.53252e-31	0.44779	0.538	0.249	1.29212e-26	v2a
camk1da	1.99285e-30	0.407907	0.453	0.19	4.65431e-26	v2a
vsnl1b	2.33119e-30	0.543606	0.851	0.556	5.4445e-26	v2a
slc32a1	4.66215e-30	-1.10848	0.07	0.383	1.08885e-25	v2a
atp2b2	1.46641e-29	0.494599	0.661	0.369	3.42481e-25	v2a
aldocb	1.56461e-28	0.718083	0.883	0.669	3.65414e-24	v2a
dab1a	1.96556e-28	0.413467	0.532	0.256	4.59056e-24	v2a
ptprt	9.75371e-28	0.401873	0.348	0.133	2.27798e-23	v2a
atp1a3a	1.79904e-27	0.557514	0.829	0.572	4.20167e-23	v2a
GRIK2	3.5429e-27	0.440938	0.411	0.175	8.27443e-23	v2a
gria2a	7.26726e-27	0.487951	0.582	0.322	1.69727e-22	v2a
ppp3r1a	8.46646e-27	0.468077	0.826	0.558	1.97734e-22	v2a
lhx1a	1.35577e-26	-0.732242	0.082	0.376	3.1664e-22	v2a
cox7b	3.43553e-26	0.480385	0.829	0.556	8.02368e-22	v2a
slc25a5	3.60072e-26	0.456685	0.997	0.948	8.40948e-22	v2a
gpia	3.63947e-26	0.481734	0.538	0.284	8.49999e-22	v2a
pbx3b	3.73159e-26	0.683333	0.744	0.498	8.71512e-22	v2a
sv2a	3.80782e-26	0.477899	0.835	0.578	8.89317e-22	v2a
pacsin1a	1.1049e-25	0.420191	0.829	0.554	2.58051e-21	v2a
gpm6aa	1.53623e-25	0.517951	0.943	0.82	3.58787e-21	v2a
atp6v0cb	2.31719e-25	0.54102	0.918	0.746	5.41179e-21	v2a
meis2b	7.15156e-25	0.422723	0.551	0.288	1.67025e-20	v2a
atp6v1g1	8.7334e-25	0.530004	0.782	0.566	2.03969e-20	v2a
pkma	8.88453e-25	0.520235	0.623	0.368	2.07498e-20	v2a
nrxn1a	1.43824e-24	0.465952	0.744	0.47	3.359e-20	v2a
tuba1c	1.62113e-24	0.431431	0.975	0.817	3.78615e-20	v2a
stmn2a	2.022e-24	0.466241	0.845	0.588	4.72239e-20	v2a
sypb	2.29212e-24	0.53241	0.703	0.453	5.35324e-20	v2a
ddit3	6.19123e-24	-0.859802	0.231	0.512	1.44596e-19	v2a
atp1b2a	7.00937e-24	0.530482	0.873	0.664	1.63704e-19	v2a
sncgb	3.53817e-23	0.429271	0.946	0.8	8.2634e-19	v2a
luzp2	4.44233e-23	0.4266	0.462	0.235	1.03751e-18	v2a
olfm1b	5.39315e-23	0.577077	0.731	0.511	1.25957e-18	v2a
si:ch73-119p20.1	6.11021e-23	0.523054	0.655	0.414	1.42704e-18	v2a
aplp1	1.22077e-22	0.503457	0.832	0.624	2.85111e-18	v2a
snap25a	1.77403e-22	0.493563	0.962	0.878	4.14324e-18	v2a
pgam1a	1.82797e-22	0.466574	0.421	0.207	4.26922e-18	v2a
IGLON5	1.92536e-22	0.422824	0.684	0.438	4.49668e-18	v2a
si:dkeyp-77h1.4	4.54992e-22	0.405179	0.509	0.257	1.06263e-17	v2a
hist2h2l	1.1861e-21	0.449103	0.766	0.518	2.77013e-17	v2a
cox6b1	5.83759e-21	0.469448	0.408	0.199	1.36337e-16	v2a
COX5B	9.03014e-21	0.461799	0.794	0.598	2.10899e-16	v2a
aldoaa	9.04128e-21	0.516975	0.731	0.532	2.11159e-16	v2a
tpi1b	2.1174e-20	0.490352	0.772	0.551	4.94518e-16	v2a
atp2b3b	2.65259e-20	0.422343	0.627	0.382	6.19511e-16	v2a
rtn1b	6.79972e-20	0.423534	0.823	0.61	1.58807e-15	v2a
ywhag2	8.3245e-20	0.440688	0.924	0.78	1.94419e-15	v2a
mab21l2	1.12446e-19	-0.925655	0.133	0.373	2.62618e-15	v2a
vamp2	4.34112e-19	0.448951	0.899	0.768	1.01387e-14	v2a
si:dkey-151g10.6	5.84243e-19	-0.589993	0.987	0.991	1.3645e-14	v2a
pgk1	1.03569e-18	0.442698	0.528	0.311	2.41884e-14	v2a
ca2	1.06226e-18	0.563805	0.402	0.21	2.48091e-14	v2a
atp5f1b	1.26752e-18	0.424149	0.816	0.623	2.96029e-14	v2a
foxp4	1.37747e-18	-0.922856	0.085	0.314	3.21708e-14	v2a
hmgb3a	2.62727e-18	0.426306	0.968	0.846	6.13599e-14	v2a
slc2a3a	1.08926e-17	0.52149	0.563	0.355	2.54396e-13	v2a
ckbb	1.3924e-17	0.410456	0.927	0.771	3.25194e-13	v2a
pygmb	2.55653e-17	0.407572	0.595	0.379	5.97077e-13	v2a
si:dkey-7j14.5	3.10836e-17	0.42852	0.627	0.385	7.25957e-13	v2a
FO082781.1	4.11182e-17	-0.550128	0.168	0.393	9.60317e-13	v2a
cox4i1	5.05483e-17	0.431566	0.785	0.6	1.18055e-12	v2a
cox6a1	7.11256e-17	0.42326	0.756	0.539	1.66114e-12	v2a
bsg	7.54724e-17	0.392256	0.82	0.648	1.76266e-12	v2a
CR383676.1	1.88786e-16	-0.472867	1	1	4.40909e-12	v2a
cycsb	3.2655e-16	0.395292	0.772	0.587	7.62657e-12	v2a
rplp1	3.32551e-16	-0.680162	0.848	0.894	7.76673e-12	v2a
syt1a	7.05972e-16	0.550516	0.63	0.433	1.6488e-11	v2a
cox8a	1.08379e-15	0.420426	0.797	0.615	2.53119e-11	v2a
slc25a3b	2.4917e-15	0.389861	0.703	0.518	5.81936e-11	v2a
clstn1	2.57409e-15	0.402421	0.794	0.613	6.01179e-11	v2a
atp5mc3b	2.61303e-15	0.401062	0.81	0.645	6.10273e-11	v2a
dacha	3.54597e-15	0.445693	0.396	0.217	8.28162e-11	v2a
pik3r3b	3.85414e-15	-0.645134	0.484	0.643	9.00134e-11	v2a
jun	4.27372e-15	-0.923103	0.528	0.684	9.98127e-11	v2a
marcksl1a	6.03718e-15	-0.488113	0.418	0.621	1.40998e-10	v2a
tmsb	8.10556e-15	-0.541137	0.215	0.421	1.89305e-10	v2a
nr2f2	2.9821e-14	-0.43536	0.104	0.301	6.96468e-10	v2a
nefma	3.22753e-14	0.501897	0.364	0.195	7.5379e-10	v2a
hunk	4.12971e-14	-0.445813	0.104	0.3	9.64495e-10	v2a
nfil3-5	4.1833e-14	-0.458526	0.237	0.44	9.7701e-10	v2a
CABZ01072614.1	5.92331e-14	-0.547748	1	0.994	1.38339e-09	v2a
slc6a5	8.10509e-14	-1.34948	0.136	0.319	1.89294e-09	v2a
nat8l	1.35207e-13	0.47638	0.604	0.41	3.15776e-09	v2a
inab	1.40105e-13	0.722199	0.402	0.242	3.27214e-09	v2a
pcdh11	6.88998e-13	-0.539447	0.155	0.337	1.60916e-08	v2a
cplx2l	2.61527e-12	0.518936	0.696	0.538	6.10796e-08	v2a
rpl36a	3.36587e-12	-0.45232	0.905	0.917	7.86099e-08	v2a
rpl10	5.33117e-12	-0.394743	0.75	0.827	1.24509e-07	v2a
rps23	6.03815e-12	-0.447743	0.835	0.876	1.41021e-07	v2a
rpl30	2.60334e-11	-0.417198	0.797	0.83	6.08011e-07	v2a
XR-002458691.1	3.11514e-11	-0.477076	0.861	0.912	7.27541e-07	v2a
sox11a	3.49121e-11	-0.648105	0.44	0.595	8.15372e-07	v2a
rps20	4.18674e-11	-0.412295	0.804	0.848	9.77812e-07	v2a
rps15a	7.77657e-11	-0.418738	0.826	0.871	1.81622e-06	v2a
slit3	2.16294e-10	-0.528673	0.19	0.346	5.05155e-06	v2a
crema	3.07902e-10	-0.62559	0.234	0.399	7.19105e-06	v2a
sat1a.2	3.44323e-10	-0.49219	0.326	0.475	8.04166e-06	v2a
chrna4b	0	0.680555	0.514	0.005	0	DoLA
pnoca	3.83959e-302	3.82705	0.958	0.036	8.96736e-298	DoLA
XLOC-019866	6.94126e-195	0.700799	0.556	0.016	1.62113e-190	DoLA
plrdgb	1.6623e-172	0.616127	0.333	0.005	3.88229e-168	DoLA
[truncated: 2,110 more rows]
