# Supplementary material for: Single-cell RNAseq analysis of spinal locomotor circuitry in larval zebrafish
Source: eLife. 2023 Nov 17;12:RP89338. doi: 10.7554/eLife.89338 (PMC10656102; doi:10.7554/eLife.89338)
Supplement: Supplementary file 2. [file elife-89338-supp2.xlsx]

## Sheet: Sheet 1 - Supplemental Table 2
Supplemental Table 2. DEGs in PMns versus SMns
gene	gene name
p_val	The Wilcox rank sum p-value
avg_log2FC	The average log base 2 fold change in expression
pct.1	The percentage of cells in the Primary MN expressing a gene
pct.2	The percentage of cells in the Secondary MN expressing a gene
p_val_adj	The Bonferroni adjusted p value
gene	p_val	avg_log2FC	pct.1	pct.2	p_val_adj
sox4a	1.72624e-167	-1.80477	0.414	0.926	4.15938e-163
pik3r3b	5.4149e-163	-1.70591	0.373	0.918	1.30472e-158
sox11a	8.47866e-118	-1.52265	0.543	0.91	2.04293e-113
nr2f1a	3.46987e-138	-1.33409	0.267	0.833	8.36065e-134
ddit3	1.99823e-96	-1.33171	0.347	0.785	4.81473e-92
nr2f2	5.89144e-123	-1.25109	0.254	0.799	1.41954e-118
nanos1	7.90339e-110	-1.22477	0.291	0.784	1.90432e-105
LOC100537384	2.33612e-94	-1.20536	0.552	0.859	5.62889e-90
alcamb	9.99861e-109	-1.18484	0.233	0.765	2.40916e-104
FO082781.1	9.0784e-119	-1.18479	0.33	0.855	2.18744e-114
pou2f2a	2.73431e-94	-1.17359	0.241	0.722	6.58831e-90
rplp1	5.29856e-94	-1.1501	0.894	0.976	1.27669e-89
mycn	5.63974e-94	-1.12053	0.155	0.655	1.3589e-89
CR383676.1	1.2646e-147	-1.0454	1	1	3.04705e-143
islr2	3.73701e-92	-0.980423	0.394	0.814	9.00432e-88
nfil3-5	3.31496e-90	-0.973284	0.269	0.735	7.98739e-86
marcksl1b	1.31153e-106	-0.96984	0.901	0.977	3.16013e-102
onecut1	1.46874e-58	-0.96792	0.312	0.669	3.53893e-54
znf704	3.41614e-87	-0.952315	0.42	0.831	8.23118e-83
tmsb	8.06296e-75	-0.919429	0.284	0.701	1.94277e-70
rpl12	4.84302e-57	-0.913687	0.711	0.86	1.16693e-52
pnrc2	1.52789e-77	-0.909911	0.737	0.91	3.68145e-73
pou3f1	7.53409e-68	-0.906616	0.183	0.599	1.81534e-63
isl2b	7.62966e-67	-0.90158	0.19	0.608	1.83837e-62
rps20	2.42554e-61	-0.900326	0.698	0.871	5.84435e-57
foxp1b	4.45193e-32	-0.894245	0.2	0.469	1.07269e-27
hunk	2.64834e-78	-0.881013	0.101	0.569	6.38117e-74
si:dkey-151g10.6	5.95061e-68	-0.841721	0.968	0.994	1.4338e-63
naca	3.74766e-67	-0.838079	0.688	0.868	9.02999e-63
rps27.1	1.20486e-59	-0.830114	0.748	0.888	2.9031e-55
rps12	1.26205e-48	-0.815181	0.741	0.876	3.04092e-44
rpl30	2.60913e-53	-0.812979	0.688	0.84	6.28671e-49
btf3	9.55631e-63	-0.810021	0.638	0.839	2.30259e-58
marcksl1a	1.04068e-54	-0.796976	0.619	0.839	2.50751e-50
BX569787.1	9.83246e-67	-0.795365	0.112	0.543	2.36913e-62
rpl32	4.54105e-53	-0.783747	0.8	0.903	1.09417e-48
rps15a	9.94516e-50	-0.77255	0.765	0.888	2.39629e-45
rpl23	9.83674e-48	-0.76837	0.752	0.889	2.37016e-43
rps23	3.98863e-53	-0.759672	0.806	0.914	9.6106e-49
rpl36a	2.3458e-45	-0.758141	0.812	0.913	5.6522e-41
elavl3	7.32136e-83	-0.757224	0.97	0.996	1.76408e-78
ephb3	1.37806e-45	-0.75436	0.405	0.683	3.32043e-41
znf503	2.4828e-56	-0.745772	0.259	0.626	5.98231e-52
fthl27	2.1143e-33	-0.704224	0.42	0.653	5.09441e-29
faua	2.79701e-43	-0.697025	0.791	0.888	6.73941e-39
rpl37	3.28477e-39	-0.684113	0.866	0.917	7.91464e-35
rps21	5.93702e-40	-0.683306	0.797	0.883	1.43053e-35
rps14	3.20565e-43	-0.682823	0.776	0.881	7.72401e-39
si:ch211-222l21.1	5.32028e-57	-0.669716	0.703	0.913	1.28192e-52
rps27.2	7.6452e-47	-0.665101	0.524	0.76	1.84211e-42
rpl8	3.4343e-37	-0.652191	0.772	0.878	8.27494e-33
sinhcafl	6.47169e-56	-0.650694	0.142	0.522	1.55935e-51
rps4x	7.97952e-43	-0.650132	0.681	0.835	1.92266e-38
rnf44	6.37091e-43	-0.649973	0.36	0.659	1.53507e-38
rpl14	1.08571e-38	-0.648716	0.761	0.853	2.61603e-34
esrrga	6.48988e-38	-0.647499	0.151	0.465	1.56374e-33
rplp2	1.04613e-34	-0.644873	0.744	0.843	2.52066e-30
hoxd9a	2.94528e-40	-0.644686	0.155	0.468	7.09666e-36
dachd	3.82776e-51	-0.641479	0.244	0.6	9.22298e-47
rpl27a	7.51415e-35	-0.641215	0.61	0.785	1.81053e-30
CR383676.2	1.3568e-24	-0.636521	0.317	0.538	3.26921e-20
rpl35	1.00533e-39	-0.635414	0.731	0.861	2.42234e-35
hmgb1b	1.10101e-42	-0.626493	0.668	0.824	2.65287e-38
rpl11	1.46559e-32	-0.623558	0.718	0.835	3.53133e-28
rps16	2.84423e-38	-0.621883	0.707	0.848	6.85317e-34
rpl36	3.41138e-35	-0.612846	0.767	0.855	8.21973e-31
hmga1a	2.73342e-39	-0.611878	0.554	0.773	6.58618e-35
hoxa11b	8.54082e-30	-0.610618	0.205	0.469	2.05791e-25
hoxa10b	1.88586e-39	-0.609278	0.166	0.476	4.54397e-35
rpl18	4.14856e-38	-0.605798	0.752	0.867	9.99595e-34
zgc:194659	1.71909e-44	-0.605175	0.071	0.397	4.14214e-40
anp32a	3.39944e-40	-0.604726	0.528	0.748	8.19094e-36
pou3f3b	4.46779e-34	-0.603311	0.388	0.639	1.07651e-29
ptmaa	2.89371e-44	-0.598651	0.95	0.983	6.9724e-40
jun	1.3719e-16	-0.597582	0.825	0.897	3.30558e-12
hnrnpa0l	3.4525e-41	-0.596287	0.657	0.833	8.31879e-37
rpl39	1.31428e-31	-0.595084	0.866	0.906	3.16675e-27
rps28	7.09637e-32	-0.593049	0.705	0.832	1.70987e-27
rps9	1.97129e-38	-0.593032	0.698	0.852	4.74983e-34
rpl13	1.17737e-36	-0.584316	0.718	0.861	2.83688e-32
rpl10a	6.65577e-30	-0.582642	0.685	0.813	1.60371e-25
rplp0	4.32e-31	-0.582477	0.815	0.884	1.0409e-26
ret	8.9331e-47	-0.579918	0.179	0.53	2.15243e-42
gfra3	1.23951e-45	-0.578773	0.101	0.442	2.9866e-41
baz2ba	4.90438e-40	-0.578444	0.457	0.718	1.18171e-35
hoxc10a	1.81992e-42	-0.571917	0.19	0.515	4.38511e-38
si:dkey-67c22.2	9.03537e-37	-0.563068	0.267	0.554	2.17707e-32
ackr3b	4.91012e-34	-0.561639	0.06	0.33	1.18309e-29
rpl10	8.35717e-30	-0.55876	0.724	0.843	2.01366e-25
rps3a	4.42815e-31	-0.558679	0.724	0.843	1.06696e-26
CR847968.1	5.45511e-37	-0.553971	0.131	0.43	1.31441e-32
bach2b	7.07534e-38	-0.549425	0.31	0.602	1.7048e-33
foxp4	4.08514e-37	-0.548149	0.136	0.452	9.84314e-33
rack1	3.02121e-35	-0.544827	0.655	0.821	7.27961e-31
rps19	1.6101e-30	-0.540846	0.778	0.864	3.87954e-26
si:ch211-137a8.4	3.14267e-39	-0.538286	0.179	0.485	7.57227e-35
BX005254.3	2.57719e-36	-0.535059	0.086	0.375	6.20974e-32
rpl27	4.60027e-27	-0.532527	0.675	0.795	1.10844e-22
pcdh9	1.75974e-36	-0.521722	0.151	0.453	4.24008e-32
serbp1a	3.72729e-34	-0.521119	0.634	0.812	8.9809e-30
rplp2l	3.2167e-24	-0.519647	0.677	0.806	7.75063e-20
si:ch73-1a9.3	6.7987e-34	-0.514276	0.862	0.936	1.63815e-29
rpl28	6.3137e-30	-0.513787	0.815	0.884	1.52129e-25
hoxd10a	4.38709e-24	-0.510385	0.226	0.457	1.05707e-19
rpl13a	1.05526e-28	-0.508922	0.763	0.869	2.54265e-24
epb41a	9.84073e-36	-0.504841	0.444	0.715	2.37112e-31
auts2a	5.45022e-33	-0.502602	0.166	0.444	1.31323e-28
stmn1a	4.97164e-32	-0.499235	0.056	0.313	1.19792e-27
rpl18a	4.26535e-28	-0.496874	0.737	0.839	1.02774e-23
rsrp1	2.19568e-22	-0.496079	0.716	0.832	5.29049e-18
hoxc4a	1.34983e-32	-0.494618	0.159	0.44	3.25243e-28
chd7	6.26629e-32	-0.493138	0.332	0.595	1.50986e-27
tshz3b	5.69089e-29	-0.492229	0.114	0.368	1.37122e-24
baz1b	6.85514e-22	-0.491027	0.388	0.589	1.65175e-17
rps27a	1.278e-25	-0.49072	0.746	0.859	3.07935e-21
sec61g	2.20245e-24	-0.485434	0.442	0.631	5.30681e-20
tfap4	9.77157e-36	-0.482719	0.211	0.503	2.35446e-31
kdm1a	2.69016e-33	-0.481406	0.381	0.636	6.48194e-29
seta	5.89325e-28	-0.480731	0.379	0.613	1.41998e-23
onecut2	4.31177e-23	-0.479467	0.364	0.588	1.03892e-18
rpl5b	6.94987e-29	-0.479172	0.394	0.63	1.67457e-24
cirbpb	2.16065e-36	-0.477215	0.864	0.965	5.20608e-32
pbx4	3.35088e-28	-0.476915	0.474	0.686	8.07394e-24
si:ch73-386h18.1	1.49339e-21	-0.476229	0.304	0.517	3.59831e-17
rpl9	5.13539e-25	-0.476014	0.737	0.838	1.23737e-20
rps24	3.435e-23	-0.474399	0.804	0.856	8.27662e-19
meis1b	2.38174e-31	-0.474054	0.653	0.831	5.7388e-27
eif4ebp1	8.07865e-32	-0.472935	0.267	0.533	1.94655e-27
ube2e3	5.21829e-32	-0.470008	0.315	0.58	1.25735e-27
meis2a	1.47366e-28	-0.468993	0.241	0.493	3.55078e-24
ankrd12	1.68108e-24	-0.46831	0.53	0.71	4.05057e-20
tshz1	2.19219e-28	-0.467481	0.131	0.378	5.28209e-24
rps8a	1.62278e-22	-0.46457	0.733	0.832	3.91009e-18
ddx21	1.26797e-29	-0.463868	0.159	0.415	3.05517e-25
rpl15	1.74485e-22	-0.461747	0.651	0.795	4.20421e-18
meis2b	4.2725e-29	-0.460457	0.136	0.394	1.02946e-24
rps25	9.98293e-25	-0.459947	0.8	0.885	2.40539e-20
rps15	3.03627e-21	-0.454165	0.765	0.851	7.31589e-17
gtpbp4	8.29303e-34	-0.454007	0.166	0.454	1.9982e-29
prr12b	1.42542e-22	-0.453907	0.375	0.569	3.43454e-18
gpc2	4.19111e-30	-0.45203	0.08	0.336	1.00985e-25
si:dkey-42i9.4	1.09384e-27	-0.451747	0.121	0.365	2.63561e-23
clk4a	5.9001e-26	-0.450823	0.502	0.704	1.42163e-21
gpm6aa	8.98874e-24	-0.44982	0.511	0.694	2.16584e-19
rpl26	3.69787e-20	-0.449498	0.726	0.83	8.91001e-16
hoxd11a	1.01753e-21	-0.449324	0.155	0.366	2.45175e-17
LOC110438055	1.71764e-26	-0.445822	0.08	0.312	4.13866e-22
klf7b	5.16375e-21	-0.444603	0.386	0.583	1.24421e-16
rps26l	4.96203e-18	-0.440156	0.716	0.793	1.1956e-13
zbtb20	3.32415e-26	-0.439057	0.213	0.455	8.00953e-22
rbm39a	8.8162e-29	-0.434969	0.373	0.619	2.12426e-24
LOC100331115	4.99e-38	-0.433214	0.06	0.353	1.20234e-33
mex3b	5.13772e-28	-0.42913	0.205	0.461	1.23793e-23
atf4b	8.56833e-24	-0.428721	0.547	0.723	2.06454e-19
rpl35a	1.98037e-19	-0.428055	0.746	0.825	4.77171e-15
marcksa	1.69562e-31	-0.427874	0.129	0.398	4.0856e-27
hoxd3a	6.75909e-22	-0.427816	0.519	0.685	1.6286e-17
setb	9.0229e-22	-0.425859	0.438	0.629	2.17407e-17
hnrnpabb	4.89459e-20	-0.424376	0.444	0.629	1.17935e-15
ptmab	3.98371e-26	-0.423819	0.972	0.986	9.59875e-22
rpl38	3.314e-20	-0.423539	0.804	0.863	7.98508e-16
h3f3d	4.78335e-23	-0.423106	0.901	0.939	1.15255e-18
rps5	7.91753e-21	-0.422943	0.683	0.814	1.90773e-16
sox4b	2.77789e-29	-0.420707	0.134	0.39	6.69333e-25
spen	1.45295e-17	-0.41908	0.539	0.673	3.50089e-13
rps3	4.55482e-18	-0.418112	0.614	0.728	1.09748e-13
rerea	1.2993e-24	-0.415901	0.422	0.639	3.13067e-20
chd4a	5.46649e-19	-0.412584	0.401	0.596	1.31715e-14
rpl22	6.51303e-17	-0.412063	0.683	0.775	1.56932e-12
klf6a	4.09824e-16	-0.410671	0.427	0.604	9.8747e-12
tpt1	6.45376e-17	-0.409345	0.631	0.73	1.55503e-12
rpl7a	8.03031e-21	-0.409306	0.668	0.804	1.9349e-16
rpl34	3.42683e-18	-0.406842	0.731	0.817	8.25696e-14
rpl7	6.67267e-17	-0.406728	0.703	0.8	1.60778e-12
rps7	6.40963e-19	-0.406317	0.698	0.818	1.5444e-14
atf7ip	1.42468e-17	-0.405956	0.537	0.693	3.43276e-13
eef1g	1.36717e-19	-0.400852	0.629	0.772	3.29419e-15
ank2b	5.44092e-19	-0.400694	0.513	0.695	1.31099e-14
brd2a	2.11441e-21	-0.396724	0.265	0.476	5.09468e-17
kmt2a	2.7318e-22	-0.395948	0.284	0.503	6.58227e-18
rpl19	2.37263e-16	-0.392978	0.782	0.861	5.71685e-12
si:dkey-12h9.6	1.00491e-27	-0.39232	0.093	0.336	2.42133e-23
cux1a	2.02556e-24	-0.389447	0.188	0.423	4.88059e-20
rps29	3.73699e-17	-0.387563	0.836	0.893	9.00429e-13
XLOC-007078	8.00228e-28	-0.386949	0.082	0.327	1.92815e-23
stmn1b	9.48336e-21	-0.385291	0.595	0.786	2.28502e-16
fbxl6	6.28682e-24	-0.384234	0.116	0.337	1.51481e-19
hmgn6	3.06441e-20	-0.383416	0.586	0.748	7.38369e-16
rps13	3.55611e-18	-0.381789	0.709	0.824	8.56845e-14
pank2	8.18396e-25	-0.380869	0.226	0.466	1.97193e-20
nfil3	1.48368e-29	-0.380862	0.093	0.349	3.57492e-25
map1aa	5.08061e-27	0.380597	0.558	0.332	1.22417e-22
mt-nd4	2.94312e-29	0.38087	0.573	0.339	7.09144e-25
gria2a	9.65518e-38	0.381141	0.45	0.204	2.32642e-33
reep5	7.62137e-80	0.382719	0.336	0.078	1.83637e-75
ppm1e	1.32078e-31	0.387599	0.442	0.218	3.18242e-27
EML5	1.26383e-55	0.387701	0.31	0.089	3.0452e-51
fgf12b	5.11713e-37	0.388044	0.463	0.219	1.23297e-32
dpysl3	1.58382e-24	0.388359	0.582	0.384	3.81623e-20
nell2b	1.10372e-38	0.389529	0.36	0.144	2.65941e-34
hk1	5.20055e-57	0.39239	0.373	0.119	1.25307e-52
adam23a	2.87274e-24	0.393138	0.534	0.334	6.92186e-20
palm1a	2.62057e-31	0.39396	0.569	0.324	6.31426e-27
vat1	1.05735e-34	0.394222	0.431	0.203	2.54767e-30
mt-co3	8.06498e-22	0.397336	0.976	0.952	1.94326e-17
stau2	1.51438e-59	0.398552	0.375	0.118	3.64889e-55
cox5ab	2.87181e-60	0.39996	0.384	0.121	6.91962e-56
fosaa	2.51102e-29	0.40031	0.466	0.247	6.05031e-25
clta	4.34094e-38	0.400463	0.459	0.218	1.04595e-33
pcdh11	1.54377e-28	0.401779	0.547	0.305	3.71972e-24
vdac2	2.80671e-26	0.402824	0.688	0.496	6.76277e-22
atp6v1h	3.41752e-81	0.4041	0.336	0.078	8.23452e-77
camk1da	3.18076e-89	0.404477	0.358	0.08	7.66405e-85
fermt2	1.9316e-28	0.405071	0.526	0.3	4.65418e-24
pcdh7a	2.76505e-18	0.40755	0.666	0.505	6.6624e-14
gnb1a	1.31752e-30	0.409356	0.776	0.578	3.17456e-26
dynll2b	2.60193e-57	0.410843	0.336	0.1	6.26934e-53
si:ch73-127m5.1	5.66857e-45	0.411553	0.362	0.134	1.36584e-40
idh2	7.04205e-27	0.415008	0.571	0.369	1.69678e-22
spock3	3.73561e-58	0.416518	0.373	0.118	9.00094e-54
si:dkey-178k16.1	2.56549e-40	0.417667	0.468	0.218	6.18155e-36
ca2	1.94605e-75	0.420414	0.33	0.078	4.689e-71
gphnb	1.26774e-62	0.422612	0.414	0.135	3.05463e-58
si:dkey-276j7.1	4.25938e-26	0.424037	0.599	0.39	1.0263e-21
grid1b	5.3333e-132	0.425851	0.33	0.048	1.28506e-127
napgb	7.25166e-58	0.425968	0.429	0.15	1.74729e-53
mcu	1.85654e-149	0.426621	0.323	0.041	4.47334e-145
crema	8.07178e-17	0.428595	0.433	0.276	1.94489e-12
smdt1b	1.18267e-56	0.429921	0.334	0.102	2.84964e-52
abcg4a	1.18049e-85	0.430069	0.334	0.074	2.8444e-81
bcl2b	5.77882e-134	0.433565	0.338	0.05	1.39241e-129
il6st	4.05326e-21	0.434083	0.353	0.189	9.76634e-17
rab6bb	5.69896e-52	0.434114	0.457	0.181	1.37317e-47
ldhba	3.16588e-55	0.434499	0.481	0.19	7.62819e-51
atp8a1	2.09514e-48	0.434936	0.489	0.213	5.04825e-44
olfm2a	1.0696e-112	0.435036	0.312	0.051	2.5772e-108
napba	1.69687e-78	0.435613	0.379	0.1	4.08862e-74
nat16	7.2597e-23	0.436623	0.685	0.485	1.74923e-18
pip4k2ab	1.24847e-88	0.43891	0.379	0.091	3.0082e-84
bin1a	2.81138e-59	0.44018	0.472	0.177	6.77401e-55
ywhae1	6.89529e-26	0.44093	0.638	0.439	1.66142e-21
elmsan1b	3.81938e-22	0.441424	0.341	0.178	9.20279e-18
XLOC-040108	1.06481e-35	0.442023	0.438	0.205	2.56566e-31
hspa8	2.08287e-29	0.442115	0.931	0.831	5.01868e-25
kiaa1549la	1.0886e-63	0.442502	0.388	0.121	2.62298e-59
gpx4b	2.49838e-52	0.443447	0.433	0.168	6.01985e-48
oip5-as1	4.08905e-24	0.44559	0.679	0.511	9.85256e-20
clstn3	2.21346e-44	0.446963	0.446	0.191	5.33334e-40
si:ch211-114m9.1	1.26211e-151	0.44827	0.345	0.046	3.04105e-147
stat3	5.32006e-25	0.448376	0.591	0.378	1.28187e-20
si:ch211-254n4.3	4.50861e-136	0.448749	0.302	0.039	1.08635e-131
nlgn2b	1.2669e-74	0.450372	0.369	0.098	3.05259e-70
atp5pd	1.29365e-76	0.450793	0.418	0.12	3.11704e-72
tnr	5.26751e-50	0.452461	0.405	0.152	1.26921e-45
scn1bb	1.40715e-122	0.452598	0.345	0.057	3.39052e-118
ptprsa	2.70505e-22	0.455048	0.746	0.583	6.51783e-18
NC-002333.17	1.60447e-18	0.456767	0.994	0.997	3.86596e-14
cicb	6.5233e-22	0.45801	0.435	0.261	1.57179e-17
pfkpa	3.58374e-117	0.458741	0.39	0.075	8.63503e-113
gpr158a	3.04408e-76	0.458898	0.409	0.116	7.33471e-72
cox6b2	5.14247e-41	0.459185	0.504	0.245	1.23908e-36
tjp1b	6.57616e-47	0.461911	0.554	0.262	1.58453e-42
rph3ab	3.67634e-79	0.464517	0.356	0.09	8.85813e-75
cpeb4b	1.17099e-48	0.466757	0.506	0.223	2.8215e-44
gadd45ba	9.65204e-20	0.46941	0.353	0.192	2.32566e-15
slc3a2b	3.17569e-26	0.469594	0.582	0.363	7.65181e-22
nova1	7.4888e-34	0.470143	0.838	0.636	1.80443e-29
egr4	8.27872e-16	0.470963	0.537	0.386	1.99476e-11
pcsk1	2.91709e-44	0.471132	0.36	0.135	7.02873e-40
tusc3	8.26828e-93	0.474852	0.394	0.094	1.99224e-88
cdh4	1.35506e-90	0.475391	0.418	0.107	3.26501e-86
tob1a	5.66077e-19	0.475579	0.685	0.546	1.36396e-14
spock2	6.36073e-54	0.476153	0.446	0.172	1.53262e-49
cd99l2	6.84413e-42	0.477738	0.524	0.263	1.64909e-37
SEMA4F	1.13633e-125	0.479168	0.384	0.069	2.73799e-121
slitrk4	1.71745e-132	0.480735	0.358	0.057	4.13819e-128
dscaml1	1.15938e-79	0.482482	0.332	0.077	2.79353e-75
ubc	4.26256e-25	0.486186	0.672	0.504	1.02706e-20
prnprs3	1.45888e-53	0.48619	0.42	0.157	3.51516e-49
vapb	1.5003e-69	0.486191	0.498	0.177	3.61498e-65
syngr3b	7.21977e-157	0.487782	0.364	0.05	1.7396e-152
si:dkey-46i9.1	1.26291e-133	0.488444	0.386	0.066	3.04298e-129
xbp1	1.51118e-27	0.489958	0.575	0.354	3.64118e-23
mvp	1.50002e-60	0.490896	0.319	0.088	3.6143e-56
cox5aa	7.84716e-42	0.491188	0.55	0.287	1.89077e-37
atp1a3a	2.45484e-35	0.492171	0.627	0.379	5.91494e-31
ppib	5.94729e-93	0.492365	0.39	0.093	1.433e-88
NC-002333.4	1.49818e-22	0.492695	0.998	0.999	3.60986e-18
cycsb	1.59033e-36	0.49305	0.547	0.298	3.83189e-32
zgc:65894	8.70037e-27	0.49463	0.599	0.4	2.09635e-22
eef2l2	1.89411e-99	0.495185	0.392	0.089	4.56386e-95
sv2a	1.49806e-38	0.497488	0.591	0.334	3.60959e-34
grm4	1.57614e-100	0.497947	0.412	0.096	3.79771e-96
slc25a3b	1.28788e-47	0.503958	0.64	0.349	3.10315e-43
atp5md	4.50686e-58	0.504259	0.425	0.153	1.08593e-53
atp5meb	2.83711e-63	0.504817	0.463	0.167	6.83601e-59
scg2b	3.87336e-35	0.505687	0.466	0.228	9.33285e-31
ppp3ca	8.76894e-52	0.506253	0.659	0.354	2.11287e-47
brinp1	2.47299e-53	0.506847	0.457	0.183	5.95867e-49
atp5pf	8.93989e-66	0.507189	0.466	0.165	2.15407e-61
ajap1	3.15568e-109	0.512948	0.369	0.072	7.6036e-105
bsnb	8.09449e-62	0.51311	0.47	0.173	1.95037e-57
pdcd6	6.85164e-246	0.51472	0.336	0.024	1.6509e-241
mt-co1	3.76688e-34	0.517338	0.976	0.936	9.07629e-30
atp6v0b	8.02611e-93	0.51874	0.468	0.131	1.93389e-88
glra1	3.10704e-36	0.526768	0.649	0.404	7.48641e-32
casz1	1.1721e-53	0.527542	0.494	0.204	2.82417e-49
ank2a	3.01563e-60	0.531216	0.5	0.199	7.26615e-56
cpe	1.217e-56	0.532323	0.58	0.267	2.93237e-52
cdk5r2a	3.35842e-83	0.53277	0.517	0.167	8.09212e-79
si:ch211-153j24.3	7.40193e-37	0.532952	0.384	0.166	1.7835e-32
si:ch211-214j24.9	3.17081e-77	0.533513	0.511	0.177	7.64007e-73
mt-nd1	9.06755e-52	0.538355	0.657	0.336	2.18483e-47
si:ch211-195b13.1	7.75706e-71	0.539183	0.498	0.175	1.86906e-66
vdac3	6.35742e-46	0.540285	0.681	0.405	1.53182e-41
cadm4	5.3346e-52	0.546673	0.642	0.344	1.28537e-47
cd81a	1.40118e-27	0.54846	0.812	0.666	3.37614e-23
pclob	1.0827e-46	0.548961	0.532	0.251	2.60877e-42
zgc:193541	3.44594e-49	0.54936	0.584	0.299	8.303e-45
zgc:153426	1.12209e-39	0.551747	0.513	0.27	2.70368e-35
grin2db	1.81628e-121	0.556321	0.358	0.062	4.37632e-117
nrcama	3.07756e-110	0.557002	0.422	0.095	7.41538e-106
atp5f1e	4.78056e-45	0.557469	0.595	0.324	1.15188e-40
lhx4	3.1562e-43	0.560862	0.552	0.274	7.60486e-39
mt-co2	7.68542e-38	0.561174	0.978	0.96	1.8518e-33
fosb	3.95582e-47	0.561531	0.356	0.128	9.53155e-43
dnajc5aa	3.33294e-51	0.561752	0.653	0.362	8.03071e-47
aldoaa	8.08013e-62	0.561903	0.595	0.271	1.94691e-57
mdh1aa	6.65601e-79	0.562506	0.532	0.188	1.60376e-74
agrn	1.29999e-29	0.564964	0.851	0.756	3.13232e-25
atp5fa1	8.72878e-57	0.567371	0.696	0.386	2.1032e-52
chata	2.13886e-36	0.569156	0.862	0.674	5.15359e-32
aplp2	1.35944e-85	0.571322	0.496	0.158	3.27556e-81
slc25a5	2.16768e-28	0.571848	0.909	0.886	5.22304e-24
slc18a3a	8.94014e-37	0.576497	0.881	0.73	2.15413e-32
slc2a3a	1.30079e-54	0.576786	0.384	0.133	3.13426e-50
ckmt1	7.43289e-130	0.580066	0.45	0.093	1.79095e-125
pygmb	4.2341e-101	0.580912	0.522	0.151	1.02021e-96
gpr186	1.2297e-39	0.581496	0.468	0.224	2.96296e-35
pcdh10b	4.11503e-52	0.583967	0.509	0.223	9.91516e-48
cox6c	9.38039e-48	0.586091	0.55	0.274	2.2602e-43
stmn4l	9.82298e-22	0.586215	0.841	0.707	2.36685e-17
kif1aa	9.05924e-42	0.586631	0.825	0.614	2.18282e-37
atp5mf	2.38287e-47	0.58716	0.597	0.322	5.74151e-43
IGLON5	6.96467e-71	0.587435	0.571	0.232	1.67814e-66
mapk10	2.93728e-60	0.588127	0.724	0.389	7.07739e-56
cacna2d1a	8.11135e-70	0.58958	0.569	0.226	1.95443e-65
mdkb	3.62412e-49	0.592338	0.591	0.302	8.73233e-45
flot2a	1.90819e-52	0.59765	0.726	0.448	4.59778e-48
nrxn1a	2.79246e-76	0.599188	0.526	0.187	6.72843e-72
cbln2b	3.75714e-116	0.599484	0.347	0.061	9.05282e-112
map1b	5.06845e-91	0.604561	0.519	0.161	1.22124e-86
BX927333.1	2.40952e-270	0.605226	0.375	0.027	5.80573e-266
syt3	1.48066e-64	0.608557	0.571	0.245	3.56765e-60
rims2a	6.31623e-88	0.610636	0.448	0.128	1.5219e-83
mir132-2	1.83148e-131	0.615259	0.369	0.061	4.41295e-127
mtbl	4.95312e-92	0.619013	0.446	0.123	1.19345e-87
ywhag1	3.18289e-48	0.622116	0.614	0.327	7.66918e-44
sv2bb	2.35625e-200	0.627408	0.414	0.051	5.67737e-196
itm2cb	8.91122e-50	0.628153	0.433	0.176	2.14716e-45
ywhaba	6.08687e-64	0.631633	0.731	0.412	1.46663e-59
syn2a	2.62149e-91	0.631952	0.517	0.163	6.31647e-87
ank1a	7.87695e-250	0.634071	0.397	0.035	1.89795e-245
eno2	1.48034e-50	0.634666	0.694	0.403	3.56688e-46
h2afx1	2.0588e-15	0.634912	0.774	0.678	4.96068e-11
nfia	7.91421e-193	0.636822	0.397	0.048	1.90693e-188
mcama	9.51881e-268	0.640128	0.373	0.028	2.29356e-263
aplp1	2.18971e-58	0.641161	0.886	0.631	5.27612e-54
ywhaqa	1.87919e-60	0.641306	0.575	0.269	4.5279e-56
gjd1a	1.33957e-52	0.64539	0.683	0.404	3.22769e-48
glrbb	2.49946e-117	0.646471	0.517	0.136	6.02244e-113
cadpsb	1.08884e-71	0.648759	0.647	0.298	2.62357e-67
sik1	7.66785e-60	0.651028	0.315	0.09	1.84757e-55
kif1b	6.00085e-45	0.65222	0.681	0.417	1.44591e-40
clstn1	4.56121e-60	0.654164	0.737	0.427	1.09902e-55
gng3	9.65659e-49	0.654911	0.707	0.455	2.32676e-44
bsg	1.87273e-64	0.655312	0.703	0.375	4.51234e-60
cox4i1	1.12065e-50	0.655868	0.679	0.403	2.70021e-46
pkma	1.75383e-94	0.660179	0.532	0.169	4.22584e-90
cox7b	1.56177e-52	0.66174	0.567	0.284	3.7631e-48
sypb	3.29472e-92	0.664188	0.588	0.209	7.93863e-88
dab1a	6.15334e-91	0.664454	0.578	0.203	1.48265e-86
camta1a	2.70366e-112	0.665985	0.569	0.169	6.51446e-108
ywhaqb	8.03811e-64	0.666502	0.849	0.568	1.93678e-59
npas4a	1.07509e-91	0.670871	0.388	0.096	2.59043e-87
COX5B	3.20539e-70	0.672237	0.655	0.315	7.7234e-66
atpv0e2	2.50784e-116	0.673013	0.537	0.149	6.04265e-112
tagln3b	2.66032e-89	0.678975	0.341	0.075	6.41005e-85
hist2h2l	4.26008e-39	0.682685	0.556	0.308	1.02647e-34
atp5l	5.88765e-63	0.683754	0.623	0.298	1.41863e-58
znf536	2.17547e-113	0.686073	0.489	0.124	5.2418e-109
atp6v0a1b	9.246e-85	0.686245	0.597	0.227	2.22782e-80
pabpc1b	1.17642e-149	0.687554	0.519	0.112	2.83459e-145
calr	1.03315e-126	0.689916	0.498	0.118	2.48938e-122
syt12	2.43477e-138	0.705067	0.524	0.123	5.86658e-134
si:dkeyp-77h1.4	9.32319e-177	0.705978	0.459	0.073	2.24642e-172
atp6ap2	1.26526e-139	0.706154	0.532	0.126	3.04864e-135
kcna1a	2.40432e-95	0.707292	0.485	0.142	5.79321e-91
cox7a2a	1.30688e-74	0.708844	0.541	0.209	3.14894e-70
CABZ01029822.1	2.75221e-64	0.709215	0.489	0.187	6.63146e-60
atp2b3b	2.33223e-124	0.710611	0.591	0.164	5.6195e-120
slc8a1b	3.22014e-182	0.710736	0.489	0.082	7.75894e-178
calb2b	3.67387e-91	0.714791	0.345	0.077	8.85219e-87
hmgb3a	2.3518e-34	0.715846	0.851	0.733	5.66665e-30
slitrk1	3.97918e-129	0.719273	0.519	0.127	9.58784e-125
mnx2b	3.22534e-43	0.71939	0.543	0.278	7.77145e-39
nat8l	7.55018e-49	0.720683	0.7	0.408	1.81922e-44
tubb2	3.63144e-217	0.722494	0.414	0.047	8.74996e-213
CABZ01039304.1	3.12576e-140	0.722668	0.509	0.113	7.53153e-136
atp5f1b	1.28568e-68	0.72418	0.787	0.473	3.09784e-64
cplx1	3.31217e-115	0.726199	0.61	0.188	7.98068e-111
atp6v1g1	1.42293e-83	0.728526	0.586	0.228	3.42855e-79
ntrk1	0	0.738619	0.341	0.014	0
pacsin1a	3.7803e-94	0.741302	0.72	0.325	9.10863e-90
cox6a1	8.56589e-73	0.747703	0.606	0.27	2.06395e-68
scn8aa	6.78995e-85	0.761231	0.647	0.285	1.63604e-80
si:ch73-119p20.1	1.67882e-128	0.767557	0.606	0.174	4.04512e-124
eno1a	1.38833e-141	0.768557	0.601	0.158	3.34518e-137
atp5mc1	3.3502e-85	0.770453	0.578	0.22	8.07231e-81
cox7c	1.94942e-63	0.775499	0.616	0.314	4.69712e-59
cpeb2	1.53369e-73	0.788092	0.746	0.388	3.69543e-69
rab3ab	1.66848e-130	0.796752	0.647	0.201	4.02021e-126
appb	1.05312e-86	0.809554	0.739	0.365	2.5375e-82
tpi1b	6.29752e-85	0.811421	0.679	0.306	1.51739e-80
cox8a	2.77388e-71	0.815038	0.623	0.299	6.68367e-67
calm3b	3.24564e-78	0.816605	0.75	0.447	7.82036e-74
slc5a7a	6.87763e-66	0.827033	0.847	0.568	1.65717e-61
nsfa	1.54424e-140	0.828976	0.597	0.164	3.72086e-136
si:ch211-113g11.6	2.80571e-164	0.830921	0.537	0.112	6.76035e-160
SLC35D3	0	0.833163	0.474	0.029	0
atp5mc3b	2.96453e-67	0.8371	0.728	0.427	7.14304e-63
atp2b3a	1.48192e-110	0.844234	0.765	0.331	3.57069e-106
fkbp1aa	3.81408e-69	0.845734	0.666	0.362	9.19003e-65
si:dkey-33c12.3	4.18606e-245	0.846968	0.407	0.039	1.00863e-240
rnasekb	1.51524e-92	0.847252	0.703	0.319	3.65097e-88
CR848683.2	0	0.847303	0.489	0.015	0
vsnl1a	5.44676e-128	0.862929	0.565	0.158	1.3124e-123
sv2c	2.68065e-92	0.8683	0.7	0.312	6.45904e-88
sypa	1.6264e-130	0.874236	0.657	0.214	3.9188e-126
scn8ab	5.68355e-104	0.880139	0.642	0.241	1.36945e-99
aldocb	5.75269e-105	0.881837	0.817	0.413	1.38611e-100
BX247868.1	1.23368e-85	0.882083	0.664	0.289	2.97255e-81
CT027989.1	5.22223e-58	0.883623	0.422	0.161	1.2583e-53
ppp3r1a	6.15606e-115	0.883818	0.713	0.293	1.4833e-110
ppiab	1.67854e-42	0.888688	0.81	0.715	4.04445e-38
sh3gl2a	2.74584e-177	0.891422	0.623	0.141	6.61609e-173
colq	4.05623e-157	0.901102	0.638	0.166	9.77349e-153
calca	2.54785e-160	0.909026	0.5	0.1	6.13904e-156
stx1b	1.20831e-87	0.916276	0.925	0.727	2.91141e-83
slc8a2b	6.34477e-302	0.922512	0.532	0.057	1.52877e-297
atp6v1e1b	6.0509e-147	0.940919	0.629	0.176	1.45797e-142
si:dkey-85n7.6	8.09913e-150	0.944437	0.545	0.13	1.95148e-145
bcam	3.88599e-141	0.945744	0.685	0.209	9.36329e-137
nefma	1.3184e-187	0.949785	0.455	0.068	3.17667e-183
atp6v0ca	1.21756e-120	0.963421	0.746	0.319	2.93371e-116
mt-cyb	3.99137e-77	0.964195	0.918	0.714	9.61719e-73
gapdhs	1.73256e-92	0.97476	0.86	0.532	4.1746e-88
tuba1c	1.11816e-64	0.978239	0.894	0.737	2.6942e-60
vgf	5.76227e-83	0.985814	0.679	0.299	1.38842e-78
tmem59l	5.57828e-125	0.997181	0.765	0.326	1.34409e-120
ckbb	2.0113e-71	0.997521	0.806	0.537	4.84623e-67
syt2a	9.1622e-70	1.00787	0.86	0.614	2.20763e-65
tppp2	6.33781e-90	1.0106	0.748	0.399	1.52709e-85
neurod1	4.58342e-138	1.02212	0.399	0.069	1.10437e-133
si:dkey-56f14.4	8.26759e-258	1.02454	0.448	0.047	1.99208e-253
vamp1b	9.97544e-255	1.04757	0.578	0.084	2.40358e-250
snap25a	5.88816e-92	1.04823	0.916	0.73	1.41875e-87
ndufa4	7.16966e-237	1.05141	0.614	0.104	1.72753e-232
rbfox1	6.53217e-141	1.09436	0.888	0.438	1.57393e-136
pcbp3	4.87636e-118	1.09922	0.69	0.258	1.17496e-113
calm2b	1.27385e-62	1.10926	0.86	0.705	3.06935e-58
rbfox3a	4.75854e-121	1.11134	0.774	0.333	1.14657e-116
epha4b	9.43171e-70	1.12406	0.672	0.367	2.27257e-65
atp1b3b	1.20809e-134	1.1264	0.769	0.312	2.9109e-130
atp1a3b	7.35249e-277	1.14066	0.56	0.072	1.77158e-272
cacna1ab	1.50094e-132	1.15346	0.744	0.298	3.6165e-128
mt-atp6	5.85733e-95	1.15729	0.894	0.602	1.41132e-90
pcp4a	1.32908e-185	1.162	0.442	0.067	3.20242e-181
fosab	1.46865e-49	1.16554	0.759	0.546	3.53871e-45
pcdh7b	9.93285e-242	1.16573	0.713	0.146	2.39332e-237
atp1b2a	2.4301e-140	1.17058	0.892	0.485	5.85532e-136
ywhag2	1.06004e-117	1.20374	0.873	0.523	2.55418e-113
neflb	1.91969e-128	1.2115	0.569	0.164	4.62548e-124
grin1a	6.43578e-208	1.22638	0.653	0.146	1.5507e-203
atp6v0cb	4.62791e-147	1.23535	0.873	0.421	1.1151e-142
stmn2a	9.54267e-123	1.24035	0.75	0.337	2.29931e-118
edil3a	9.61202e-189	1.2792	0.584	0.121	2.31602e-184
mafba	5.00286e-153	1.28851	0.397	0.064	1.20544e-148
stxbp1a	2.49789e-161	1.30845	0.849	0.396	6.01866e-157
calm3a	2.89747e-208	1.38133	0.647	0.143	6.98146e-204
si:dkey-7j14.5	2.87116e-187	1.40756	0.677	0.179	6.91805e-183
nptna	5.5566e-300	1.42649	0.754	0.139	1.33886e-295
vamp1a	3.44669e-138	1.44371	0.83	0.391	8.30479e-134
vsnl1b	1.29039e-205	1.51375	0.828	0.275	3.10919e-201
atp2b4	3.77438e-177	1.51414	0.834	0.357	9.09436e-173
cplx2l	7.46081e-185	1.57966	0.78	0.272	1.79768e-180
nefmb	3.11839e-128	1.62976	0.647	0.225	7.51377e-124
scn4ba	1.3846e-299	1.63432	0.662	0.101	3.33618e-295
kcnc3a	3.60611e-197	1.70558	0.894	0.379	8.68891e-193
atp1a1a.1	1.4973e-177	1.71469	0.869	0.423	3.60775e-173
trarg1a	9.30358e-261	1.73613	0.763	0.174	2.2417e-256
calm1a	3.01425e-142	1.76191	0.948	0.695	7.26284e-138
ache	3.55941e-187	1.86008	0.873	0.385	8.57639e-183
zgc:65851	3.29421e-247	1.95795	0.608	0.105	7.93739e-243
sncgb	6.52255e-180	1.98952	0.916	0.52	1.57161e-175
syt2b	4.00858e-238	2.1109	0.894	0.34	9.65867e-234
chga	0	2.22443	0.767	0.103	0
calm1b	1.95377e-207	2.22686	0.821	0.276	4.70762e-203
